# Supplementary material for: Physical Activity-Related Health Competence, Physical Activity, and Physical Fitness: Analysis of Control Competence for the Self-Directed Exercise of Adolescents
Source: MDPI journal article supplement (doi:10.3390/ijerph17010039), 2019-12-19
Supplement: s1 [file s1]

## Supplementary Material

**Table S2.** Mean values, standard deviation, and bivariate correlations of the relevant variables.

|   |                                                      | N   | M     | SD   | 1      | 2      | 3      | 4      | 5      | 6      | 7      | 8 |
|---|------------------------------------------------------|-----|-------|------|--------|--------|--------|--------|--------|--------|--------|---|
| 1 | Cognitive attitudes towards the health effects of PA | 832 | 4.65  | 0.44 | -      |        |        |        |        |        |        |   |
| 2 | Affective attitudes towards the health effects of PA | 832 | 3.84  | 0.75 | 0.48** | -      |        |        |        |        |        |   |
| 3 | Interest in training, physical fitness, and health   | 830 | 3.36  | 0.86 | 0.37** | 0.54** | -      |        |        |        |        |   |
| 4 | Health-related fitness knowledge                     | 834 | 0.00  | 1.26 | 0.14** | 0.08*  | 0.19** | -      |        |        |        |   |
| 5 | Control competence for physical training             | 831 | 3.47  | 0.71 | 0.32** | 0.44** | 0.48** | 0.10** | -      |        |        |   |
| 6 | Sport activity                                       | 811 | 4.92  | 4.06 | 0.24** | 0.40** | 0.29** | 0.05   | 0.40** | -      |        |   |
| 7 | Cardiorespiratory fitness                            | 782 | 0.39  | 0.83 | 0.21** | 0.34** | 0.26** | 0.23** | 0.27** | 0.34** | -      |   |
| 8 | Muscular fitness                                     | 786 | -0.56 | 0.85 | 0.19** | 0.27** | 0.23** | 0.23** | 0.26** | 0.34** | 0.51** | - |

*Note.* N = sample size; M = Mean; SD = Standard Deviation.

\*  $p < 0.05$ , \*\*  $p < 0.001$ .
