# Supplementary material for: Physical Activity-Related Health Competence, Physical Activity, and Physical Fitness: Analysis of Control Competence for the Self-Directed Exercise of Adolescents
Source: MDPI journal article supplement (doi:10.3390/ijerph17010039), 2019-12-19
Supplement: s1 [file s1]

## Supplementary Material

**Table S1.** Descriptive statistics for the individual items of control competence for studies A and B (English-translated and German versions).

| Abbr.                     | Item                                                                                                                                                       |   | <i>M</i> | <i>SD</i> | <i>S</i> | <i>K</i> | <i>r<sub>it</sub></i> | $\alpha$<br>(A/B) |
|---------------------------|------------------------------------------------------------------------------------------------------------------------------------------------------------|---|----------|-----------|----------|----------|-----------------------|-------------------|
| CCPT1                     | I am able to adjust my training effort well to my physical condition.                                                                                      | A | 3.80     | 0.91      | -0.55    | 0.11     | 0.55                  |                   |
|                           | Ich bin in der Lage eine Trainingsbelastung gut auf meine körperlichen Voraussetzungen anzupassen.                                                         | B | 3.77     | 0.86      | -0.47    | 0.03     | 0.54                  |                   |
| CCPT2                     | I know how to use physical training to improve my endurance in the best possible way.                                                                      | A | 3.77     | 0.94      | -0.60    | 0.07     | 0.56                  |                   |
|                           | Ich weiß, wie ich mit körperlichem Training meine Ausdauerleistung am besten steigern kann.                                                                | B | 3.64     | 0.98      | -0.46    | -0.30    | 0.55                  |                   |
| CCPT3                     | If my muscles are tensed up, I know exactly how to counter this through physical activity.                                                                 | A | 2.90     | 1.20      | 0.09     | -0.91    | 0.47                  |                   |
|                           | Wenn ich muskulär verspannt bin, weiß ich genau, wie ich mit körperlicher Aktivität etwas dagegen tun kann.                                                | B | 2.81     | 1.18      | 0.22     | -0.82    | 0.54                  |                   |
| CCPT4                     | I can use my body signals (pulse, breathing speed) very well to gauge and regulate the amount of physical load.                                            | A | 3.23     | 1.16      | -0.18    | -0.84    | 0.53                  | 0.77/<br>0.78     |
|                           | Ich kann Signale meines Körpers (Puls, Atemgeschwindigkeit) sehr gut dafür nutzen, um die Höhe der körperlichen Belastung einzuschätzen und zu regulieren. | B | 3.21     | 1.12      | -0.22    | -0.78    | 0.50                  |                   |
| CCPT5                     | If I want to enhance my health by strengthening trunk muscles (back, stomach), I am confident that I know the right exercises to do.                       | A | 3.61     | 1.12      | -0.50    | -0.53    | 0.52                  |                   |
|                           | Wenn ich meine Gesundheit durch die Kräftigung der Rumpfmuskulatur (Rücken, Bauch) fördern möchte, traue ich mir zu, die richtigen Übungen auszuwählen.    | B | 3.65     | 1.03      | -0.60    | -0.14    | 0.54                  |                   |
| CCPT6                     | I know what to pay attention to in relation to my body in order to avoid excess load or insufficient load.                                                 | A | 3.75     | 0.97      | -0.66    | 0.25     | 0.54                  |                   |
|                           | Ich weiß, worauf ich bei meinem Körper achten muss, damit ich mich nicht über- oder unterfordere.                                                          | B | 3.76     | 0.95      | -0.60    | 0.08     | 0.55                  |                   |
| Mean Value for Scale CCPT |                                                                                                                                                            | A | 3.51     | 0.73      | -0.29    | -0.01    |                       |                   |
|                           |                                                                                                                                                            | B | 3.47     | 0.71      | -0.27    | -0.06    |                       |                   |

|                           |                                                                                       |   |      |      |       |       |      |       |
|---------------------------|---------------------------------------------------------------------------------------|---|------|------|-------|-------|------|-------|
| PAAR1                     | I am able to regulate my mood through physical activity.                              | A | 3.56 | 1.13 | -0.56 | -0.35 | 0.60 |       |
|                           | Ich bin in der Lage durch körperliche Aktivität meine Stimmung zu regulieren.         | B | 3.71 | 0.99 | -0.59 | 0.05  | 0.66 |       |
| PAAR2                     | If I am feeling down, I can distract myself well through physical activity.           | A | 3.45 | 1.31 | -0.40 | -0.99 | 0.72 |       |
|                           | Wenn es mir schlecht geht, kann ich mich durch körperliche Aktivität gut ablenken.    | B | 3.38 | 1.28 | -0.29 | -1.02 | 0.76 |       |
| PAAR3                     | I am well able to improve my depressed mood by exercising.                            | A | 3.49 | 1.21 | -0.39 | -0.76 | 0.75 | 0.85/ |
|                           | Mir gelingt es gut, meine gedrückte Stimmung durch Bewegung zu verbessern.            | B | 3.46 | 1.15 | -0.42 | -0.57 | 0.82 | 0.88  |
| PAAR4                     | I am well able to work off pent-up stress and inner tension through exercise.         | A | 3.61 | 1.20 | -0.54 | -0.59 | 0.67 |       |
|                           | Ich kann aufgestauten Stress und innere Anspannung durch Bewegung gut wieder abbauen. | B | 3.57 | 1.15 | -0.49 | -0.57 | 0.75 |       |
| Mean Value for Scale PAAR |                                                                                       | A | 3.53 | 1.01 | -0.44 | -0.51 |      |       |
|                           |                                                                                       | B | 3.53 | 0.98 | -0.42 | -0.44 |      |       |

*Note.* CCPT = Control competence for physical training; PAAR = Physical activity-specific affect regulation; M = Mean; SD = Standard Deviation; S = Skewness; K = Kurtosis;  $r_{it}$  = Corrected item-test-correlation;  $\alpha$  = Cronbachs alpha.
