# Supplementary material for: Physical Activity-Related Health Competence, Physical Activity, and Physical Fitness: Analysis of Control Competence for the Self-Directed Exercise of Adolescents
Source: MDPI journal article supplement (doi:10.3390/ijerph17010039), 2019-12-19
Supplement: s1 [file s1]

**Supplementary Material**  
**File S5. Explanation variables study A and study B**

| Study A  |                                                                                                              |                      |
|----------|--------------------------------------------------------------------------------------------------------------|----------------------|
| Variable | Explanation                                                                                                  | Values               |
| Laufnr   | consecutive number of test person                                                                            |                      |
| gender   | gender                                                                                                       | 1 = female; 2 = male |
| school   | cluster variable                                                                                             | 1-22                 |
| Alter    | age                                                                                                          |                      |
| SKT1     | Item control competence for physical training 1                                                              | 1-5                  |
| SKT2     | Item control competence for physical training 2                                                              | 1-5                  |
| SKT3     | Item control competence for physical training 3                                                              | 1-5                  |
| SKT4     | Item control competence for physical training 4                                                              | 1-5                  |
| SKT5     | Item control competence for physical training 5                                                              | 1-5                  |
| SKT6     | Item control competence for physical training 6                                                              | 1-5                  |
| BR1      | Item physical activity-specific affect regulation 1                                                          | 1-5                  |
| BR2      | Item physical activity-specific affect regulation 2                                                          | 1-5                  |
| BR3      | Item physical activity-specific affect regulation 3                                                          | 1-5                  |
| BR4      | Item physical activity-specific affect regulation 4                                                          | 1-5                  |
| SKT      | Mean score control competence for physical training                                                          |                      |
| BR       | Mean score physical activity-specific affect regulation                                                      |                      |
|          |                                                                                                              |                      |
| Study B  |                                                                                                              |                      |
| Variable | Explanation                                                                                                  | Values               |
| Laufnr   | consecutive number of test person                                                                            |                      |
| sex      | gender                                                                                                       | 0 = female; 1 = male |
| class    | cluster variable                                                                                             | 1-48                 |
| Alter    | age                                                                                                          |                      |
| T1CCPL1  | Item control competence for physical training 1                                                              | 1-5                  |
| T1CCPL2  | Item control competence for physical training 2                                                              | 1-5                  |
| T1CCPL3  | Item control competence for physical training 3                                                              | 1-5                  |
| T1CCPL4  | Item control competence for physical training 4                                                              | 1-5                  |
| T1CCPL5  | Item control competence for physical training 5                                                              | 1-5                  |
| T1CCPL6  | Item control competence for physical training 6                                                              | 1-5                  |
| T1PAMR1  | Item physical activity-specific affect regulation 1                                                          | 1-5                  |
| T1PAMR2  | Item physical activity-specific affect regulation 2                                                          | 1-5                  |
| T1PAMR3  | Item physical activity-specific affect regulation 3                                                          | 1-5                  |
| T1PAMR4  | Item physical activity-specific affect regulation 4                                                          | 1-5                  |
| T1CCPL   | Mean score control competence for physical training                                                          |                      |
| T1PAMR   | Mean score physical activity-specific affect regulation                                                      |                      |
|          |                                                                                                              |                      |
| T1HrFK   | WLE Score health-related fitness knowledge                                                                   |                      |
| T1FG     | Mean score interest in training, physical fitness, and health                                                |                      |
| T1ATTK   | Mean score cognitive attitudes towards the health effects of PA                                              |                      |
| T1ATTA   | Mean score affective attitudes towards the health effects of PA                                              |                      |
| T1pA     | weekly duration (in hours) of habitual physical activity                                                     |                      |
| T1zSR    | Shuttle Run: z-standardised (age and gender [43]) values of running speed (km/h) at the last completed stage |                      |
| T1zStr   | mean of three z-standardised strength exercises (age and gender [44])                                        |                      |
