# Supplementary material for: Physical Activity-Related Health Competence, Physical Activity, and Physical Fitness: Analysis of Control Competence for the Self-Directed Exercise of Adolescents
Source: Int J Environ Res Public Health. 2019 Dec 19;17(1):39. doi: 10.3390/ijerph17010039 (PMC6981936; doi:10.3390/ijerph17010039)
Supplement: Supplementary file 1 [file ijerph-17-00039-s001.zip]

Archive with 5 entries (5 files):
- Supplementary Material_PAHCO/Supplementary Material_File S4.xlsx
- Supplementary Material_PAHCO/Supplementary Material_File S5.pdf
- Supplementary Material_PAHCO/Supplementary Material_Table S1.pdf
- Supplementary Material_PAHCO/Supplementary Material_Table S2.pdf
- Supplementary Material_PAHCO/Supplemetary Material_File S3.xlsx
