# Supplementary material for: Physical Activity-Related Health Competence, Physical Activity, and Physical Fitness: Analysis of Control Competence for the Self-Directed Exercise of Adolescents
Source: Int J Environ Res Public Health. 2019 Dec 19;17(1):39. doi: 10.3390/ijerph17010039 (PMC6981936; doi:10.3390/ijerph17010039)
Supplement: Supplementary file 1 [file ijerph-17-00039-s001.zip › Supplementary Material_PAHCO/Supplementary Material_File S4.xlsx]

## Sheet: Supplementary Material_File S4
Laufnr	age	class	sex	T1CCPL1	T1CCPL2	T1CCPL3	T1CCPL4	T1CCPL5	T1CCPL6	T1PAMR1	T1PAMR2	T1PAMR3	T1PAMR4	T1CCPL	T1PAMR	T1HRFK	T1FG	T1ATTK	T1ATTA	T1pA	T1zSR	T1zStr
1	14	1	1	3	4	2	3	4	4	3	3	3	4	3.33333	3.25	-0.726002	3.25	4.66667	4.25	15	0.0280641	-0.288794
2	13	1	1	5	5	3	4	5	5	4	4	4	4	4.5	4	1.39367	4.75	5	5	7.5	1.04398	1.15457
3	14	1	1	3	5	2	3	5	4	3	1	3	1	3.66667	2	0.128065	2.5	4.33333	4.25	8	0.0280641	-0.797746
4	15	1	1	2	2	1	3	4	2	3	3	3	3	2.33333	3	-1.25963	1.5	4	2.5	0.666667	-0.0965922	-1.6365
5	14	1	1	-99	-99	-99	-99	-99	-99	-99	-99	-99	-99	-99	-99	-99	-99	-99	-99	-99	0.0280641	-0.776765
6	14	1	1	4	5	4	4	4	4	3	4	3	4	4.16667	3.5	-3.12553	2.66667	4.66667	4.5	3	-0.751352	-1.35907
7	14	1	1	4	3	2	2	5	4	3	2	2	2	3.33333	2.25	1.2244	4	4.66667	4.5	1	0.0280641	0.261511
8	14	1	1	2	2	3	2	3	3	3	1	2	1	2.5	1.75	-0.871419	2	4.66667	1.75	3	0.0280641	-1.05048
9	14	1	1	4	3	3	2	4	2	4	2	3	2	3	2.75	-0.41465	3.25	4.33333	3.25	2.25	0.41788	-0.5281
10	14	1	1	4	3	4	2	4	4	4	4	4	4	3.5	4	-0.254547	4.5	4.66667	4.5	4.5	0.0280641	-0.515874
11	14	1	1	5	3	2	4	2	4	4	2	3	3	3.33333	3	-0.813246	3.5	4.66667	5	8.5	1.58772	0.517725
12	14	1	1	3	3	1	2	4	2	1	2	2	3	2.5	2	0.782018	3	4.33333	2.5	0	0.807764	0.044241
13	14	1	1	4	3	1	2	3	3	5	5	5	3	2.66667	4.5	-2.05853	3	5	4.5	17.67	0.807764	0.356295
14	14	1	1	5	3	2	3	3	5	4	2	3	3	3.5	3	-0.931632	3.25	4.33333	3.5	6.5	0.0280641	-0.791176
15	14	1	1	1	2	2	4	1	1	2	4	1	1	1.83333	2	-2.46374	1.75	4.33333	3.25	0	-1.14094	-2.05744
16	14	1	1	4	4	4	3	4	3	4	4	5	3	3.66667	4	-2.53429	2.5	4.33333	3	2	0.41788	0.312979
17	14	1	1	3	3	3	3	3	4	4	4	4	4	3.16667	4	1.84546	3.5	4.66667	3.75	5.75	0.807764	0.135549
18	14	1	1	5	5	4	2	4	4	3	3	2	4	4	3	-1.43284	2.5	4.66667	3.5	9.5	1.19771	-0.481684
19	15	1	1	-99	-99	-99	-99	-99	-99	-99	-99	-99	-99	-99	-99	-99	-99	-99	-99	-99	1.02684	0.158803
20	14	2	0	4	2	1	2	1	3	3	4	3	2	2.16667	3	-0.543891	2	3.66667	3.75	0	0.120529	-1.74318
21	14	2	0	5	2	1	5	1	3	5	5	5	3	2.83333	4.5	-0.359485	3.5	5	3.75	0	0.120529	-1.38117
22	14	2	0	4	4	5	3	4	4	2	1	1	1	4	1.25	2.71547	2.75	5	3.75	0	0.120529	-1.56449
23	14	2	0	5	5	5	5	4	4	5	5	5	5	4.66667	5	-0.896737	4.5	3.66667	4.75	10.5	1.74037	0.260823
24	14	2	0	3	3	4	2	5	5	3	2	3	5	3.66667	3.25	-0.0627835	3.25	4.33333	3.75	5.5	0.659338	-0.852638
25	14	2	0	2	5	3	3	4	4	2	3	3	3	3.5	2.75	-0.526152	2.5	5	3.75	0	0.659338	-0.746332
26	15	2	0	3	4	2	2	4	4	3	3	3	4	3.16667	3.25	-1.40522	2	4.33333	3.25	0	0.0977617	-1.56728
27	14	2	0	4	4	5	1	4	5	3	3	3	3	3.83333	3	1.20171	2.75	5	3.25	0.833333	0.120529	-2.14733
28	13	2	0	4	5	3	2	5	5	2	2	2	2	4	2	0.16701	4	5	2.5	1	0.704185	-0.718023
29	14	2	0	4	2	1	1	5	3	3	2	2	1	2.66667	2	-1.22447	3	4.66667	3.25	0	0.120529	-1.19137
30	14	2	0	3	3	3	3	3	3	5	5	5	5	3	5	-1.13015	3.5	5	3.75	5	1.1993	-0.145634
31	14	2	0	4	3	-99	3	3	4	4	4	3	4	3.4	3.75	-0.580344	4.25	4.66667	4.5	2	-0.417068	-1.11865
32	13	2	0	5	5	4	5	5	5	5	5	5	5	4.83333	5	0.71306	4.5	5	5	9	1.25741	-0.292199
33	15	2	0	5	5	4	5	4	4	5	4	5	5	4.5	4.75	-0.523509	4.25	4.66667	4.5	6	0.0977617	-0.805357
34	14	2	0	4	3	3	2	3	4	3	3	3	3	3.16667	3	-0.0120645	3.5	5	4.5	4	1.1993	0.599422
35	14	2	0	4	4	2	2	3	4	4	2	3	4	3.16667	3.25	-1.30547	3.25	4.33333	4.5	3	0.120529	-0.940828
36	14	2	0	4	3	2	3	5	3	3	2	3	3	3.33333	2.75	-0.198438	2.25	5	3.75	4	-99	-99
37	14	2	0	5	4	4	3	5	5	3	3	4	4	4.33333	3.5	0.330406	3.25	4.33333	4.75	-99	-99	1.13178
38	14	2	0	5	4	3	3	4	4	5	5	5	5	3.83333	5	1.54342	4.75	5	4.75	6.25	-99	0.511232
39	14	3	0	4	3	3	3	4	4	5	5	5	5	3.5	5	0.603497	2.75	4.33333	4.25	2	-99	-99
40	14	3	0	4	3	2	5	4	4	4	5	5	5	3.66667	4.75	0.756067	3.5	4.33333	4.25	4	0.659338	-0.84268
41	14	3	0	4	4	3	4	4	4	3	4	4	5	3.83333	4	1.02515	4.25	4.66667	3.5	1	0.120529	-2.12979
42	14	3	0	4	5	2	4	4	5	2	3	3	4	4	3	-0.978655	4.25	5	4.75	1.33333	-99	-99
43	14	3	0	4	3	4	3	4	3	3	3	3	3	3.5	3	0.923477	2.25	5	3.75	4.08333	1.1993	-0.815189
44	14	3	0	3	4	2	5	4	2	3	3	4	4	3.33333	3.5	2.0894	3.75	5	3.75	4.41667	-99	-99
45	14	3	0	4	3	3	4	3	4	4	3	3	3	3.5	3.25	0.293898	3.5	5	4.75	3.5	0.120529	-0.976152
46	14	3	0	3	3	2	3	4	3	4	4	4	3	3	3.75	0.940857	4	4.66667	3.75	4	0.659338	-1.14248
47	14	3	0	2	2	3	2	2	2	2	1	1	2	2.16667	1.5	1.23434	2.25	4.33333	2.75	1.91667	-0.417068	-1.83529
48	14	3	0	2	2	3	2	2	3	5	5	4	5	2.33333	4.75	0.245456	2.5	5	5	3	1.1993	-1.00053
49	14	3	0	3	3	5	3	3	5	4	5	5	4	3.66667	4.5	1.17183	3.75	4.33333	5	4	0.659338	-1.78236
50	14	3	0	5	5	5	5	5	5	5	5	5	5	5	5	-0.99493	4.75	5	4	5.25	0.659338	-1.64478
51	14	3	0	3	4	2	2	3	4	3	3	2	3	3	2.75	1.75691	2	4.66667	2.5	4	-99	-99
52	14	3	0	5	4	4	4	5	4	5	5	5	5	4.33333	5	-0.400459	4.5	4.66667	4.75	13	-0.417068	-0.891947
53	14	3	0	3	5	1	5	5	5	5	5	5	5	4	5	-1.53616	5	5	4.5	5.25	-0.953393	-2.33803
54	14	3	0	4	4	3	3	3	4	4	5	4	4	3.5	4.25	-1.58177	3.5	5	4.25	6.16667	1.1993	-1.59757
55	14	3	0	4	2	2	4	3	4	4	2	3	3	3.16667	3	2.85859	2.75	4	3	0.5	-99	-99
56	14	4	0	5	4	4	4	5	4	5	5	4	4	4.33333	4.5	-0.991005	4.5	5	3.75	3.08333	-99	-99
57	14	4	0	4	4	2	3	4	4	3	4	3	3	3.5	3.25	-1.4495	3.5	4.66667	4.25	3	-99	-0.805231
58	15	4	0	2	3	1	2	3	3	4	4	3	3	2.33333	3.5	-0.101264	3.25	5	3.75	6	1.16293	-0.996432
59	14	4	0	2	1	5	3	3	2	4	1	2	1	2.66667	2	-0.0914213	4.5	5	4.5	1	-0.953393	-2.38512
60	14	4	0	3	3	3	1	5	5	1	1	5	3	3.33333	2.5	-0.901891	2.5	4.33333	3	2	-0.417068	-2.32429
61	14	4	0	4	3	3	4	5	3	4	4	4	4	3.66667	4	1.32133	4.5	4.33333	4.25	7	0.659338	-1.1569
62	15	4	0	4	5	2	1	4	4	3	2	2	2	3.33333	2.25	0.239749	3.25	4.66667	4.25	1	-0.433055	-1.3379
63	14	4	0	4	4	4	2	2	2	5	5	5	5	3	5	-1.3796	3.25	5	4.5	9.33333	1.1993	-1.61568
64	14	4	0	3	4	1	3	4	4	2	2	4	4	3.16667	3	-0.767955	2.5	4.66667	2.5	1	-0.417068	-1.16575
65	15	4	0	4	5	3	4	5	5	4	5	4	5	4.33333	4.5	-1.18605	3.75	4.66667	4.5	14	0.0977617	-1.09315
66	14	4	0	3	5	2	2	2	5	4	2	4	4	3.16667	3.5	0.351136	2.5	5	4.75	6	0.659338	-0.836964
67	14	4	0	4	4	2	2	5	4	4	4	4	5	3.5	4.25	-2.21565	4.5	5	4.25	6	1.74037	-0.805231
68	14	4	0	4	4	3	3	5	4	4	3	3	3	3.83333	3.25	-0.438758	4.25	4.66667	4.5	8.08333	1.1993	-1.45439
69	14	5	0	5	4	4	4	4	4	4	3	2	3	4.16667	3	-0.0792023	2.5	4	3.25	1.52917	1.1993	-0.676129
70	14	5	0	4	4	3	4	3	4	4	4	4	4	3.66667	4	1.06082	4.75	5	4.25	4.08333	1.1993	-0.518756
71	14	5	0	4	3	2	5	4	4	4	2	2	2	3.66667	2.5	-1.58834	3	4.33333	3	0	0.120529	-0.907878
72	13	5	0	4	3	3	2	3	4	3	4	4	3	3.16667	3.5	-0.142828	3.5	5	3.75	14	0.704185	-1.6181
73	14	5	0	4	3	3	3	3	4	5	5	5	4	3.33333	4.75	0.895384	3.5	5	3.25	8.66667	1.1993	-0.932057
74	14	5	0	3	1	2	1	3	2	-99	3	3	4	2	3.33333	1.59929	3	4.66667	3.25	1	-0.953393	-2.50883
75	14	5	0	4	3	3	3	4	3	5	5	5	5	3.33333	5	1.50963	4.25	4.66667	3.75	4.66667	0.659338	-0.518628
76	14	5	0	2	4	2	2	2	5	1	1	1	1	2.83333	1	-0.88573	1	3	1.5	0	-0.417068	-1.86105
77	14	5	0	4	5	3	4	4	3	4	2	5	5	3.83333	4	0.184152	3.25	5	3.75	9.33333	0.659338	-1.47604
78	14	5	0	4	5	3	5	5	5	4	4	5	4	4.5	4.25	-0.917699	5	5	5	5	-99	-99
79	14	5	0	4	2	1	2	3	3	4	5	4	4	2.5	4.25	-0.439211	3.25	4.66667	4	5.66667	-99	-99
80	14	6	0	3	2	1	3	2	2	2	2	2	2	2.16667	2	0.645955	2.5	4.33333	4	0	0.120529	-1.76563
81	14	6	0	3	3	2	2	4	3	4	3	3	3	2.83333	3.25	-0.47259	4.25	4.33333	3	3	1.1993	-0.546861
82	14	6	0	3	2	4	3	4	1	2	1	1	3	2.83333	1.75	1.46097	1.5	5	2.25	1	-0.417068	-2.20928
83	14	6	0	4	4	3	4	3	4	4	4	4	4	3.66667	4	-0.574874	3	4.33333	4.25	8.375	1.74037	0.784089
84	14	6	0	3	3	2	3	4	3	4	4	3	4	3	3.75	0.643767	3.75	4.66667	3.5	2.5	0.659338	-0.25833
85	14	6	0	2	2	2	1	2	2	4	5	5	5	1.83333	4.75	0.455773	3.5	4.33333	3.75	2.83333	1.1993	0.0282732
86	14	6	0	3	3	2	4	4	4	4	4	4	4	3.33333	4	-0.907456	4.75	4.66667	4	0	0.120529	-1.17132
87	14	6	0	3	4	4	3	3	4	2	2	2	2	3.5	2	0.539952	1.75	4	2.5	3	1.1993	-0.149294
88	14	6	0	4	4	2	5	4	4	4	5	5	5	3.83333	4.75	0.349166	3	5	4.5	2	0.659338	-1.20957
89	14	6	0	4	4	3	2	4	4	3	3	3	3	3.5	3	-0.822408	2.75	4.66667	3.25	2	1.1993	-0.831664
90	14	6	0	4	3	3	3	2	4	4	4	4	4	3.16667	4	-1.38544	2.75	4.33333	4.75	6	2.2825	0.309289
91	13	6	0	4	4	2	2	2	2	3	3	3	3	2.66667	3	-0.62132	2.75	4.33333	3.75	1	0.704185	-0.537294
92	14	6	0	4	5	3	2	1	3	3	4	4	4	3	3.75	0.619436	2.5	5	3.5	4	0.659338	-0.264975
93	14	6	0	3	4	1	2	4	3	3	2	2	3	2.83333	2.5	-0.409788	4	4.66667	3.25	0	0.659338	-0.836579
94	14	7	0	3	3	2	1	3	3	3	3	3	3	2.5	3	0.0385697	2.25	5	3.75	2.1375	1.1993	-1.04681
95	15	7	0	4	4	3	3	3	4	4	3	3	4	3.5	3.5	-0.715471	5	5	5	3.08333	1.16293	-0.652849
96	14	7	0	4	4	2	4	5	4	3	3	3	3	3.83333	3	0.462816	3.75	4	3.5	2.33333	0.120529	-1.06913
97	14	7	0	3	3	2	2	3	3	2	2	2	2	2.66667	2	-1.36488	2.75	4	3.25	7.5	0.659338	-1.17418
98	-99	7	0	-99	-99	-99	-99	-99	-99	-99	-99	-99	-99	-99	-99	-99	-99	-99	-99	-99	-99	-99
99	14	7	0	3	1	2	2	3	3	4	3	3	2	2.33333	3	4.50555	1.25	5	2.75	7	0.120529	-1.58083
100	14	7	0	4	4	4	4	4	4	5	4	4	4	4	4.25	2.08057	3.75	5	4	3	0.659338	-1.13513
101	14	7	0	4	4	4	4	4	4	4	3	3	4	4	3.5	-1.7668	3.5	4.66667	3.75	-99	0.120529	-1.54258
102	15	7	0	3	2	1	2	1	4	3	1	3	5	2.16667	3	-1.45727	2	5	4	15.75	-0.433055	-99
103	15	7	0	5	4	2	4	5	5	5	4	4	3	4.16667	4	-0.797286	4	5	4.5	5	0.0977617	-0.578207
104	15	7	0	4	2	1	2	1	2	5	4	4	5	2	4.5	-0.251457	2.75	5	3.25	1.5	-0.433055	-1.42597
105	14	7	0	5	2	5	5	3	5	5	2	5	3	4.16667	3.75	-0.440584	2.5	5	4	0.75	-0.417068	-1.8481
106	14	7	0	3	3	2	3	4	3	3	4	4	4	3	3.75	1.20428	3.25	5	3.25	1	-0.417068	-1.53905
107	14	7	0	5	3	2	4	4	4	5	5	4	4	3.66667	4.5	-0.766538	3.75	5	3.5	4	0.659338	-0.836836
108	15	7	0	-99	-99	-99	-99	-99	-99	-99	-99	-99	-99	-99	-99	-99	-99	-99	-99	-99	0.0977617	-2.27553
109	14	7	0	3	4	3	2	4	4	3	5	4	4	3.33333	4	0.36176	3.75	5	3.5	4.5	1.74037	-0.368424
110	14	7	0	4	3	3	3	4	-99	3	4	3	4	3.4	3.5	0.899894	-99	5	-99	3.03333	0.120529	-0.823763
111	14	7	0	4	4	1	1	3	3	5	5	4	3	2.66667	4.25	-0.220881	3.25	5	4.25	2.75	0.659338	-0.591213
112	-99	7	0	-99	-99	-99	-99	-99	-99	-99	-99	-99	-99	-99	-99	-99	-99	-99	-99	-99	-99	-99
113	-99	7	0	-99	-99	-99	-99	-99	-99	-99	-99	-99	-99	-99	-99	-99	-99	-99	-99	-99	-99	-99
114	14	7	0	4	4	3	4	4	4	4	4	4	4	3.83333	4	0.662534	3.25	4.33333	4.5	6.25	0.659338	-0.230838
115	14	7	0	4	5	5	5	5	5	5	5	5	5	4.83333	5	2.46262	5	5	4.75	6.33333	1.1993	-0.333902
116	14	7	0	3	3	2	1	2	3	2	2	2	3	2.33333	2.25	1.52242	4	5	3.5	0.5	-99	-99
117	14	7	0	4	3	3	4	4	3	4	3	4	3	3.5	3.5	-0.908615	3.25	4.66667	4.5	1.5	-99	-1.50366
118	14	7	0	5	4	3	4	3	5	5	5	5	5	4	5	-1.0722	3.25	5	5	4.5	-99	-0.427194
119	14	7	0	4	5	2	4	5	4	3	4	4	3	4	3.5	2.42507	3	4.66667	4.25	1	-99	-99
120	14	8	0	5	4	2	2	5	5	5	5	5	5	3.83333	5	1.71954	4	5	5	4.5	-0.417068	0.184322
121	14	8	0	4	4	4	3	4	5	3	2	3	3	4	2.75	0.0347915	2	3.66667	2.25	3	0.120529	-0.385829
122	14	8	0	2	3	3	2	4	3	4	5	4	4	2.83333	4.25	-0.850942	4.5	4.66667	4.5	6	-0.417068	-0.882859
123	14	8	0	4	5	4	3	5	5	4	3	4	4	4.33333	3.75	-1.0954	4	5	4.5	0.75	1.74037	-0.195317
124	14	8	0	4	3	1	1	3	4	2	1	1	2	2.66667	1.5	0.516169	2.25	4.66667	3.25	1.5	0.659338	0.0861141
125	14	8	0	5	2	2	4	3	4	4	3	3	4	3.33333	3.5	0.705343	2.5	5	4.75	3	0.659338	-1.36973
126	14	8	0	4	3	2	2	3	4	4	2	2	2	3	2.5	-1.05746	4	4.33333	4	1.5	0.120529	-1.3706
127	14	8	0	3	4	2	3	4	4	3	3	3	3	3.33333	3	0.273708	3.5	5	4	2	0.659338	-0.340804
128	14	8	0	4	4	3	4	4	4	5	4	5	5	3.83333	4.75	0.133529	4.5	5	3.25	1.66667	1.1993	-0.492808
129	14	8	0	4	4	4	4	3	4	5	5	5	4	3.83333	4.75	1.41645	3.25	5	5	10.5	2.2825	0.596693
130	14	8	0	3	4	2	3	2	4	3	3	4	4	3	3.5	0.347673	2.75	4.66667	3.5	1.66667	0.659338	-0.592143
131	14	8	0	3	2	1	1	4	3	2	2	2	3	2.33333	2.25	-0.710098	4	4.66667	3.75	2.25	0.659338	-0.241598
132	14	8	0	2	2	2	2	4	4	4	4	4	4	2.66667	4	-0.222958	3.25	5	3.25	4.83333	0.659338	-0.630393
133	14	8	0	4	3	2	3	4	3	4	3	3	3	3.16667	3.25	0.278489	4	5	4	3.33333	0.659338	-0.951716
134	14	8	0	4	5	4	3	5	4	4	5	5	5	4.16667	4.75	-2.41579	4	5	4	13	0.659338	-0.234952
135	13	8	0	3	3	2	4	3	4	4	5	4	3	3.16667	4	1.01789	2.5	5	3	1.5	0.704185	-1.23301
136	-99	8	0	-99	-99	-99	-99	-99	-99	-99	-99	-99	-99	-99	-99	-99	-99	-99	-99	-99	-99	-99
137	13	9	0	4	4	3	3	3	5	5	5	4	5	3.66667	4.75	1.48042	4	4.33333	4.75	8.75	0.704185	-1.59293
138	14	9	0	4	4	3	4	4	4	3	3	4	4	3.83333	3.5	0.163537	3.5	4.33333	4.25	1.75	0.120529	-1.42404
139	14	9	0	2	5	1	4	3	3	4	4	4	4	3	4	0.183444	3	3.66667	4.75	5.75	0.659338	-1.49576
140	14	9	0	3	5	3	4	4	5	4	4	4	5	4	4.25	-0.179531	3	5	4.25	12.6667	1.74037	-0.763518
141	14	9	0	3	3	3	4	4	3	5	2	4	5	3.33333	4	0.756441	4	5	4.25	5.66667	0.120529	-2.03184
142	14	9	0	5	5	4	5	5	5	5	4	4	4	4.83333	4.25	-0.229688	4.5	5	4.25	4.75	1.1993	-0.786223
143	14	9	0	3	2	2	2	2	2	4	3	4	4	2.16667	3.75	1.57251	3.75	4.33333	5	6	0.659338	-2.6597
144	15	9	0	2	2	2	2	2	3	4	4	3	5	2.16667	4	0.0425459	3	4	4.5	2	-0.470937	-1.15889
145	14	9	0	5	4	2	4	5	3	3	3	5	5	3.83333	4	-0.0398084	4.75	4.66667	3.5	-99	1.1993	-1.45452
146	14	9	0	2	2	2	4	2	4	3	3	3	2	2.66667	2.75	-0.993604	3	4	4.25	7	1.1993	-1.32404
147	15	9	0	4	3	4	4	4	3	5	5	5	5	3.66667	5	-0.252788	3.5	4.66667	5	1.5	1.16293	-1.7017
148	14	9	0	4	5	5	4	4	3	5	5	5	5	4.16667	5	1.82953	3.5	5	4.5	4.5	2.2825	-0.211248
149	14	9	0	4	5	2	4	5	5	3	3	3	3	4.16667	3	0.924397	4.25	5	3.5	3.25	1.74037	0.269851
150	14	9	0	4	5	4	4	4	5	5	3	5	5	4.33333	4.5	3.62225	3.75	5	3.5	3.33333	1.1993	-0.921367
151	14	9	0	3	3	2	2	3	3	1	1	1	1	2.66667	1	0.0385194	2.75	5	3.5	0.75	0.120529	-2.80095
152	14	9	0	5	4	2	4	4	5	3	2	3	4	4	3	-1.38931	3.25	4.66667	2.25	0.833333	-99	-99
153	15	9	0	3	2	1	2	2	3	3	2	2	2	2.16667	2.25	1.1885	2.25	5	2.75	0	-99	-99
154	14	9	0	3	3	2	4	2	4	3	2	3	3	3	2.75	0.435727	2.5	5	4	5.33333	-99	-99
155	14	10	1	4	4	4	4	5	5	5	5	5	5	4.33333	5	1.79492	3.5	4.33333	3.25	15	1.19771	-0.0711485
156	14	10	1	4	2	1	4	4	4	-99	-99	-99	-99	3.16667	-99	0.787238	2.5	5	2.5	10.75	1.19771	0.236527
157	15	10	1	4	3	4	2	3	4	4	1	3	2	3.33333	2.5	-0.290223	3.5	5	4.25	4.66667	-0.845211	-0.471185
158	13	10	1	5	4	2	4	5	4	4	2	3	5	4	3.5	-0.765686	3.75	5	4	3	-0.605056	-1.81748
159	14	10	1	4	5	4	4	4	4	5	5	4	5	4.16667	4.75	0.342512	4.5	4.66667	4.5	4.5	0.0280641	0.112611
160	14	10	1	5	5	4	5	5	5	4	4	5	4	4.83333	4.25	0.733047	5	5	4	5.25	1.19771	0.419308
161	14	10	1	5	5	4	4	5	4	3	2	2	4	4.5	2.75	0.40938	3.75	3.66667	2.75	0.583333	-0.751352	-1.13802
162	14	10	1	4	3	2	3	4	4	4	4	4	3	3.33333	3.75	2.02086	3.5	5	4	4.5	1.19771	0.682924
163	14	10	1	3	4	3	2	3	3	4	2	3	2	3	2.75	0.131201	3.25	4.66667	4	1.25	0.0280641	-0.821898
164	14	10	1	3	4	2	2	3	3	5	5	5	5	2.83333	5	0.280226	3.5	5	4	16.3333	1.58772	1.53751
165	14	10	1	4	4	3	4	4	3	5	5	5	4	3.66667	4.75	2.37944	4.5	5	4.75	9.5	1.58772	0.918221
166	14	10	1	4	5	3	4	5	3	3	4	4	4	4	3.75	0.286401	3.25	5	4.25	4.66667	1.58772	0.881171
167	14	10	1	3	4	3	4	3	4	3	3	3	4	3.5	3.25	-1.36267	2.75	4.33333	3.25	0.5	-0.361681	-1.15305
168	14	10	1	4	5	3	5	4	5	4	3	4	3	4.33333	3.5	-0.580913	4	5	4.25	3	0.807764	1.38786
169	14	10	1	4	3	1	1	2	5	3	5	3	3	2.66667	3.5	0.803223	3	5	3.75	10.5	1.58772	0.318939
170	14	10	1	4	5	5	4	4	4	4	5	3	5	4.33333	4.25	1.2069	4.75	5	4	9.75	0.807764	-0.0679839
171	14	10	1	3	4	4	2	4	3	4	4	4	3	3.33333	3.75	-0.607638	3.5	5	3.5	2	0.0280641	-0.127903
172	14	10	1	5	4	5	5	5	5	4	3	1	4	4.83333	3	0.168392	4.5	5	2.75	12.25	0.0280641	0.108837
173	15	11	1	3	3	1	3	3	3	2	2	3	2	2.66667	2.25	-2.90116	1.75	3.66667	2.5	0	-99	-99
174	14	11	1	4	4	2	2	3	4	4	3	3	3	3.16667	3.25	-1.51266	4.5	5	3.5	1	-0.361681	-1.88462
175	14	11	1	5	5	1	5	3	5	5	5	5	5	4	5	-1.54052	3.25	5	4.75	6	-0.361681	-1.30195
176	16	11	1	5	4	5	3	5	4	5	4	5	5	4.33333	4.75	1.24122	4.5	5	4.75	11.5	-0.194943	-0.349571
177	14	11	1	4	4	2	3	4	4	4	3	4	4	3.5	3.75	1.31917	3.5	4.33333	3.5	6	0.41788	-0.587878
178	15	11	1	3	2	1	2	2	3	3	2	2	3	2.16667	2.5	-0.420581	2.5	5	3.5	0	-0.470937	-1.87545
179	13	11	1	2	5	3	2	2	2	3	2	4	3	2.66667	3	0.489776	2	5	2.25	0	-0.192911	-1.23379
180	15	11	1	4	4	3	4	5	4	5	5	5	5	4	5	-0.526467	4	4.33333	4.25	4.5	0.652299	-0.88657
181	14	11	1	-99	-99	-99	-99	-99	-99	-99	-99	-99	-99	-99	-99	-0.585666	3.25	4.33333	3.75	6.25	0.807764	-0.00277874
182	15	11	1	5	5	5	5	2	5	5	5	5	5	4.5	5	-0.364783	2.25	5	3.75	9.83333	0.652299	-0.172234
183	14	11	1	4	5	3	4	4	5	4	3	3	4	4.16667	3.5	-0.935554	3.75	4.33333	4.5	5.25	0.807764	-0.625234
184	14	11	1	4	4	4	3	4	4	4	3	4	3	3.83333	3.5	-1.93096	2.75	4.66667	3.5	1.5	-0.361681	-1.57732
185	15	11	1	5	5	5	3	5	5	4	4	3	4	4.66667	3.75	0.0373719	4	5	4.75	12	1.02684	-0.260324
186	14	11	1	5	4	4	5	5	5	3	4	4	4	4.66667	3.75	-1.45808	4.5	5	4	16	1.58772	0.727892
187	14	11	1	4	4	3	3	4	4	5	4	4	5	3.66667	4.5	0.897742	3	5	2.5	0	-0.361681	0.53938
188	14	12	1	3	5	2	4	4	4	3	4	3	4	3.66667	3.5	-1.62163	3	4.66667	4	4.5	0.41788	-0.710511
189	14	12	1	4	4	2	2	4	3	3	4	3	3	3.16667	3.25	-0.0624476	3.25	5	3.5	4	0.807764	-0.0473017
190	15	12	1	3	3	3	4	4	4	4	4	4	5	3.5	4.25	-0.0465896	2.5	3.66667	4.5	9	1.02684	-0.107169
191	-99	12	1	-99	-99	-99	-99	-99	-99	-99	-99	-99	-99	-99	-99	-99	-99	-99	-99	-99	-99	-99
192	14	12	1	5	4	1	1	5	4	5	1	5	3	3.33333	3.5	-1.64296	3.5	4.33333	4	13.5	-1.14094	-1.43937
193	14	12	1	4	4	2	3	4	4	3	5	3	4	3.5	3.75	-0.0664061	3.75	4.66667	3.5	8.5	0.0280641	-0.0660968
194	14	12	1	-99	-99	-99	-99	-99	-99	-99	-99	-99	-99	-99	-99	-6.04956	2	5	3.75	6.75	1.19771	-0.08277
195	14	12	1	3	3	2	3	2	4	4	4	3	3	2.83333	3.5	1.1177	4.25	4.66667	4.5	6.25	1.58772	0.10416
196	14	12	1	5	-99	5	5	3	5	-99	5	5	5	4.6	5	-5.16989	-99	5	4.33333	14.17	0.0280641	0.193587
197	15	12	1	5	5	3	5	5	5	5	5	5	5	4.66667	5	0.980215	5	5	4.5	15.75	0.652299	1.31561
198	15	12	1	4	4	2	3	4	4	4	4	3	4	3.5	3.75	0.0208905	3.75	5	3.75	4	-0.0965922	-1.2448
199	14	12	1	3	4	2	2	3	3	3	2	2	4	2.83333	2.75	-2.01068	2.25	5	4.25	0.666667	-1.14094	-0.802429
200	14	12	1	4	4	4	4	4	5	5	5	5	3	4.16667	4.5	-0.941672	3.25	5	3.5	14.5	0.41788	-0.862951
201	14	12	1	4	4	3	4	4	4	5	5	5	5	3.83333	5	-0.0833231	1.5	4	3.5	9.41667	-1.14094	-0.711185
202	14	12	1	4	3	3	4	4	4	4	4	4	4	3.66667	4	2.54404	3.25	4.66667	4.5	4.5	1.9778	-0.320722
203	-99	12	1	3	5	4	2	5	4	5	5	4	4	3.83333	4.5	0.248142	4.5	4.66667	4.75	9.20833	-99	-99
204	14	12	1	3	4	4	4	3	4	2	3	4	3	3.66667	3	1.11424	2.75	5	3.5	6.5	1.9778	0.0922394
205	14	13	1	5	5	5	4	5	5	5	5	4	4	4.83333	4.5	0.0858237	3.5	5	4.75	5.58333	0.807764	0.748199
206	14	13	1	5	4	5	4	5	5	4	5	5	5	4.66667	4.75	0.341976	4.25	4.66667	4	8.25	-0.361681	0.51432
207	14	13	1	3	4	1	2	3	3	3	3	3	3	2.66667	3	0.745244	2.75	5	3.75	4	0.807764	-0.924083
208	14	13	1	2	4	1	3	4	4	4	2	2	2	3	2.5	0.363101	2.75	4.66667	3.25	0	-0.361681	-1.23078
209	14	13	1	4	5	4	4	3	4	4	3	4	3	4	3.5	0.187292	2.5	4.33333	4	9.16667	0.807764	-0.0115346
210	14	13	1	5	4	3	4	4	3	4	3	4	3	3.83333	3.5	-0.173728	3.75	4.33333	3.5	6.83333	0.807764	0.373501
211	14	13	1	3	3	2	3	2	3	5	1	1	1	2.66667	2	3.43815	1.25	3.66667	1.25	0	-0.751352	-0.304119
212	14	13	1	2	3	1	2	2	3	2	1	3	1	2.16667	1.75	-1.08187	2	4.33333	3.25	4.5	0.807764	-0.50011
213	14	13	1	4	4	4	2	3	4	4	4	4	4	3.5	4	-2.25934	4.5	5	4.75	8	2.36792	0.529646
214	14	13	1	3	4	4	2	5	4	3	5	3	3	3.66667	3.5	0.298217	3.75	5	4.25	13	1.58772	0.631831
215	-99	13	1	-99	-99	-99	-99	-99	-99	-99	-99	-99	-99	-99	-99	-99	-99	-99	-99	-99	-99	-99
216	14	14	1	5	4	2	3	-99	4	-99	-99	-99	5	3.6	-99	0.590381	5	5	3.25	12.67	0.807764	0.253499
217	15	14	1	4	3	2	3	3	4	4	3	3	4	3.16667	3.5	0.190249	1.5	5	2.75	1	-0.0965922	-1.04836
218	14	14	1	4	3	1	2	4	4	5	4	4	4	3	4.25	0.112075	2.5	5	4.25	2.5	-0.361681	-0.456864
219	14	14	1	4	4	4	4	4	4	4	4	4	4	4	4	-1.94212	4	4.66667	3.75	5.5	-1.14094	-0.852543
220	15	14	1	3	4	4	4	3	4	4	3	3	3	3.66667	3.25	0.0497968	2.75	4.66667	2.75	4.5	-0.470937	-0.528766
221	-99	14	1	-99	-99	-99	-99	-99	-99	-99	-99	-99	-99	-99	-99	-99	-99	-99	-99	-99	-99	-99
222	15	14	1	4	5	3	4	4	4	4	4	4	4	4	4	-0.490689	3.5	4.33333	4.25	8.5	-0.470937	-0.260628
223	15	14	1	3	4	3	5	4	4	4	5	4	4	3.83333	4.25	-0.751234	3.5	4.66667	3.75	-99	-0.470937	-0.668654
224	14	14	1	4	4	1	1	1	1	4	2	1	3	2	2.5	-1.66274	2.25	5	4.25	1.5	0.41788	-0.281855
225	15	14	1	3	4	4	4	4	3	3	2	2	2	3.66667	2.25	-0.65194	2.25	4	2.5	1.66667	-0.470937	-0.923113
226	14	14	1	4	4	2	4	4	4	3	3	3	3	3.66667	3	-0.181377	2.25	4	3.25	3.75	1.58772	1.13392
227	14	14	1	4	4	3	2	4	3	3	4	3	3	3.33333	3.25	1.63442	2.75	4.33333	4	4.5	1.19771	0.257133
228	14	14	1	4	3	2	3	4	4	3	3	2	3	3.33333	2.75	0.0580599	2.75	5	4.25	4.25	1.19771	0.808493
229	14	14	1	4	5	3	4	4	5	4	1	4	4	4.16667	3.25	-0.144443	1.75	4.66667	2.75	3	1.19771	-0.433017
230	15	14	1	5	5	4	4	3	4	4	5	3	4	4.16667	4	-0.638183	3.5	5	4.75	9	1.02684	0.569192
231	-99	14	1	-99	-99	-99	-99	-99	-99	-99	-99	-99	-99	-99	-99	-99	-99	-99	-99	-99	-99	-99
232	15	14	1	4	4	1	2	2	2	2	1	1	1	2.5	1.25	-0.506516	3.75	5	3.25	0	-99	-99
233	-99	14	1	-99	-99	-99	-99	-99	-99	-99	-99	-99	-99	-99	-99	-99	-99	-99	-99	-99	-99	-99
234	14	15	1	3	5	3	3	3	5	5	5	4	5	3.66667	4.75	-0.759887	2.5	4.33333	3.5	2.5	-0.751352	-1.65068
235	15	15	1	3	2	2	2	4	2	3	1	4	2	2.5	2.5	0.640173	2.5	4	3	0	-0.0965922	-1.25855
236	14	15	1	-99	-99	-99	-99	-99	-99	-99	-99	-99	-99	-99	-99	-0.525107	3	5	3.66667	5.33333	-0.751352	-1.14806
237	14	15	1	-99	-99	-99	-99	-99	-99	-99	-99	-99	-99	-99	-99	0.300722	3	4.66667	3.5	4	-0.751352	-0.0306986
238	16	15	1	4	3	2	2	4	4	4	5	4	5	3.16667	4.5	-1.20224	5	5	4	6.75	0.896387	-1.33673
239	14	15	1	3	4	1	1	1	4	3	4	3	2	2.33333	3	0.337402	4	4.66667	3.25	2	0.41788	-0.946647
240	14	15	1	4	3	3	3	4	4	2	2	2	3	3.5	2.25	1.23312	2.75	4.33333	4	5.75	0.807764	-0.926943
241	14	15	1	5	4	3	3	2	5	5	5	4	5	3.66667	4.75	-1.47139	2	4.66667	4.5	10.5	0.807764	-0.791411
242	14	15	1	5	5	5	4	5	5	4	5	4	4	4.83333	4.25	0.998881	4.25	5	4.75	13	1.58772	-0.138914
243	14	15	1	5	5	5	4	5	5	5	5	5	5	4.83333	5	1.23209	4.5	5	5	18.33	0.807764	0.666321
244	15	15	1	5	5	4	2	4	5	4	5	5	5	4.16667	4.75	-0.0957236	3.75	5	3.75	12.5	1.02684	-0.500853
245	15	15	1	4	4	4	4	4	4	3	3	3	5	4	3.5	0.080583	4.25	4.66667	4	3	0.277821	-1.42467
246	15	15	1	3	2	1	1	3	4	4	2	2	3	2.33333	2.75	-2.1393	3	4.66667	3.75	10.8333	0.277821	-1.27333
247	16	16	1	5	5	5	5	5	5	3	5	5	5	5	4.5	1.2258	5	5	4.25	12.67	-0.194943	-0.772531
248	15	16	1	4	4	1	1	5	3	4	4	3	3	3	3.5	-1.04059	3.5	5	3.75	2.75	-0.470937	-1.54207
249	13	16	1	3	4	4	5	3	4	2	4	5	2	3.83333	3.25	0.575027	3	4	3.5	5.25	-0.605056	-1.17072
250	14	16	1	4	4	4	3	3	4	3	3	3	4	3.66667	3.25	-0.916372	3	5	5	7.25	0.0280641	-1.67452
251	14	16	1	4	5	4	4	5	5	4	4	5	4	4.5	4.25	-0.810779	3	5	4.25	7	-0.361681	-1.39982
252	14	16	1	4	4	5	2	5	5	4	5	5	4	4.16667	4.5	-0.958393	3.75	4.66667	4.75	10	0.807764	-0.603039
253	14	16	1	4	5	2	4	5	4	3	4	4	4	4	3.75	-0.145101	3.75	5	4	3.75	1.58772	-0.175526
254	14	16	1	4	3	2	4	2	3	3	2	1	2	3	2	-1.68856	2.5	4	2	1	-0.361681	-1.49288
255	14	16	1	5	5	2	4	4	2	4	3	-99	4	3.66667	3.66667	1.54566	3.25	5	4.5	17.5	1.58772	-1.17501
256	15	16	1	3	2	2	2	3	3	3	2	3	2	2.5	2.5	-0.238949	2	5	3.5	6.5	-0.0965922	-0.782384
257	15	16	1	4	4	4	4	4	5	4	4	4	4	4.16667	4	0.48449	4	5	4.25	5	1.02684	-0.312068
258	14	16	1	3	4	1	4	1	4	3	1	1	1	2.83333	1.5	-2.64398	3	5	3	0.75	-99	-99
259	14	17	1	4	1	1	2	4	2	3	1	3	3	2.33333	2.5	-1.47874	2	5	3.5	1.25	0.0280641	-0.707411
260	14	17	1	5	5	2	2	5	4	5	5	5	5	3.83333	5	0.19758	4.25	5	3.5	3.25	0.0280641	-0.31264
261	14	17	1	4	4	2	3	3	3	4	2	3	3	3.16667	3	-1.28266	3	4	3.25	3	0.0280641	-0.0555239
262	-99	17	1	-99	-99	-99	-99	-99	-99	-99	-99	-99	-99	-99	-99	-99	-99	-99	-99	-99	-99	-99
263	14	17	1	4	3	3	4	3	3	3	4	3	4	3.33333	3.5	-0.790623	2.25	4.33333	3.5	3	0.0280641	-0.740992
264	14	17	1	5	5	2	5	5	4	5	3	5	4	4.33333	4.25	0.00521586	4.75	4.66667	4.75	0.5	1.58772	0.0354852
265	14	17	1	4	5	4	5	5	4	5	5	5	5	4.5	5	1.47018	4	5	4	5	-99	-99
266	14	18	0	2	3	4	3	3	3	4	4	5	4	3	4.25	0.996934	3.5	5	4	4.25	0.120529	-1.49277
267	14	18	0	4	3	1	4	4	3	3	5	4	4	3.16667	4	-0.00169877	3.25	4.33333	3.5	0	1.1993	-0.874414
268	14	18	0	4	5	5	3	3	4	4	1	1	1	4	1.75	0.0970303	4	5	5	0	1.74037	0.325507
269	15	18	0	3	3	2	2	3	3	3	2	2	2	2.66667	2.25	0.212379	3	3.33333	2.75	1	0.629774	-1.47623
270	15	18	0	3	4	3	4	2	3	3	4	3	3	3.16667	3.25	0.0276914	2.75	4.33333	3.75	3	1.16293	-0.455307
271	14	18	0	4	3	2	3	5	4	4	3	4	3	3.5	3.5	-0.456794	3.75	5	4.5	4.25	0.659338	-99
272	15	18	0	-99	-99	-99	-99	-99	-99	-99	-99	-99	-99	-99	-99	-99	-99	-99	-99	-99	-2.01769	-2.1609
273	14	18	0	4	4	5	2	4	3	4	4	4	4	3.66667	4	1.43199	4	5	4	3.5	0.659338	-1.55566
274	14	18	0	3	4	4	3	4	3	3	4	4	2	3.5	3.25	-0.230185	2	3.66667	3.25	4.5	0.120529	-0.632034
275	15	18	0	4	4	4	4	5	-99	4	3	3	4	4.2	3.5	-0.769653	4.5	4	3.5	0.625	-0.962614	-1.98221
276	14	18	0	3	4	2	3	4	3	2	1	1	2	3.16667	1.5	-1.09843	1.25	3.33333	2	1	-0.953393	-1.43812
277	14	18	0	5	4	3	1	4	4	4	3	1	3	3.5	2.75	0.055316	4.25	5	4.75	3.08333	0.659338	-0.0761048
278	14	18	0	2	1	1	2	1	1	4	2	2	1	1.33333	2.25	-1.37536	3.25	4.33333	3.75	4.25	0.120529	-1.75381
279	14	18	0	5	4	3	4	3	4	4	5	4	5	3.83333	4.5	-0.998451	4.5	5	3.75	3.83333	0.659338	-0.632835
280	14	18	0	4	3	3	3	3	3	3	2	1	2	3.16667	2	1.26245	3.25	5	4.5	4	2.2825	-0.145763
281	14	18	0	4	4	2	4	5	5	3	2	2	4	4	2.75	0.699021	4.25	4.66667	4.5	2.5	1.1993	-1.12071
282	15	18	0	3	1	1	2	1	1	1	2	2	1	1.5	1.5	3.02423	4.25	5	3.25	2	-0.433055	-1.13998
283	14	18	0	2	5	1	2	3	2	5	4	4	4	2.5	4.25	-0.446214	3.5	5	3.25	0.333333	-0.417068	-1.67067
284	14	18	0	3	2	1	1	3	4	1	1	1	1	2.33333	1	-0.177499	1.75	4.66667	3.25	0.5	0.120529	-1.86895
285	14	18	0	3	4	2	2	3	3	2	2	2	2	2.83333	2	-0.890488	2.75	4	2.5	2.41667	-0.417068	-2.26825
286	14	18	0	2	2	1	1	1	2	3	4	3	3	1.5	3.25	-0.70879	3.75	4	2.25	2	0.659338	-1.4253
287	13	18	0	3	2	3	2	3	4	4	3	3	2	2.83333	3	-0.571466	3.5	4.66667	4.25	3	-0.948145	-2.05714
288	15	19	0	5	5	4	4	5	5	4	5	4	5	4.66667	4.5	0.571655	4	5	4.5	3.85417	-0.962614	-1.95472
289	14	19	0	4	4	2	2	3	3	3	5	4	4	3	4	0.684091	3.5	4.66667	4	2	-0.417068	-1.95428
290	14	19	0	3	4	4	4	4	5	4	5	5	5	4	4.75	0.906605	4	5	5	9	0.120529	-0.951588
291	14	19	0	4	4	2	2	4	3	3	1	2	4	3.16667	2.5	0.128416	3.75	4.66667	3.75	5.33333	0.120529	-1.55174
292	14	19	0	5	4	3	4	5	3	3	2	4	4	4	3.25	0.500391	3.75	4.66667	3.75	4.5	1.1993	-0.185942
293	15	19	0	4	4	3	4	4	2	2	1	2	1	3.5	1.5	-0.301622	2.75	5	4.5	0	-0.433055	-1.06435
294	15	19	0	3	3	2	3	3	3	1	2	1	2	2.83333	1.5	0.441224	2	3.66667	2.25	0	0.0977617	-1.41304
295	14	19	0	3	3	1	3	2	2	3	4	3	3	2.33333	3.25	1.89381	2.5	5	2.5	1.75	0.659338	-0.164038
296	14	19	0	3	3	1	4	5	4	4	4	3	4	3.33333	3.75	1.00856	5	5	5	3	1.74037	-0.919983
297	14	19	0	3	4	3	2	4	4	3	2	3	3	3.33333	2.75	-1.90245	3	3.66667	2.75	1	-0.417068	-1.39723
298	14	19	0	3	5	3	4	2	5	3	3	3	3	3.66667	3	-0.808408	2.75	5	4	0.5	-0.417068	-1.3453
299	14	19	0	4	4	5	5	4	4	5	4	4	5	4.33333	4.5	0.300125	4	5	4.75	3.5	1.1993	-0.652169
300	14	19	0	2	5	1	3	3	4	3	1	1	2	3	1.75	-0.101882	3.25	4.66667	2.25	0	0.120529	-0.885846
301	13	19	0	4	4	2	2	4	3	4	3	2	2	3.16667	2.75	1.1509	3.5	5	4.25	0.5	0.704185	-0.973878
302	14	19	0	4	4	3	4	4	5	4	5	4	4	4	4.25	1.48046	4.75	5	4.25	4.5	1.74037	-0.462715
303	14	19	0	4	4	3	4	4	4	5	5	5	4	3.83333	4.75	3.53587	4.5	4.66667	4	2.5	1.74037	0.116463
304	14	20	0	2	1	3	4	1	5	1	1	2	2	2.66667	1.5	-1.78899	2	4	2.75	0	-0.953393	-2.85799
305	14	20	0	5	5	4	5	5	5	5	5	5	5	4.83333	5	0.676443	5	5	5	16	2.82565	0.772529
306	14	20	0	4	3	2	4	3	3	4	2	3	3	3.16667	3	-0.39903	3.25	4.66667	4	5	0.120529	-0.656827
307	15	20	0	4	4	3	4	3	4	5	3	3	3	3.66667	3.5	-0.376246	3.5	5	4.5	5.5	0.629774	-1.01415
308	14	20	0	4	3	5	4	4	3	5	4	4	5	3.83333	4.5	1.44444	4	4.66667	4.5	3	1.1993	0.379075
309	15	20	0	3	3	1	2	2	2	5	1	2	1	2.16667	2.25	1.22764	3.5	5	4	1	-0.433055	-2.21414
310	14	20	0	3	2	2	3	4	3	4	3	4	4	2.83333	3.75	-0.470784	3.25	4	3.25	1.5	-0.417068	-1.63216
311	14	20	0	4	3	3	3	3	4	4	3	4	4	3.33333	3.75	-0.964119	3.25	4	3.25	3	-0.417068	-2.0284
312	13	20	0	4	4	5	4	5	5	5	5	5	5	4.5	5	-0.098337	4	5	4.75	2	1.25741	-0.384773
313	14	20	0	4	4	4	4	4	4	5	5	5	5	4	5	3.3076	5	4.66667	4.5	5.35417	1.1993	0.983432
314	15	20	0	4	4	3	4	3	3	4	2	-99	3	3.5	3	-2.14542	2.75	4.66667	3.75	2	1.16293	-0.87278
315	14	20	0	3	4	3	3	4	3	5	4	4	5	3.33333	4.5	1.59363	4	5	5	1.33333	0.120529	-0.473218
316	14	20	0	4	4	3	3	3	4	3	2	3	4	3.5	3	-1.63318	4.25	4.66667	4.5	1	0.120529	-0.6628
317	14	20	0	5	5	4	4	3	3	4	5	5	3	4	4.25	0.943869	3.25	5	4.5	4	0.659338	0.327751
318	14	20	0	3	5	4	4	5	3	5	3	5	5	4	4.5	0.421442	4.75	3.66667	3.5	9.5	0.659338	-0.371025
319	15	20	0	5	3	3	4	4	5	1	1	5	5	4	3	0.139538	3.25	4.66667	4.25	2	0.629774	-0.329044
320	14	20	0	4	4	3	4	4	5	4	3	4	5	4	4	0.0720956	3.75	5	4.75	4	0.120529	-1.22239
321	14	20	0	4	5	3	3	4	4	3	3	3	4	3.83333	3.25	0.554096	4	4.66667	4.25	6.66667	1.74037	-0.0591158
322	14	20	0	4	2	2	2	4	4	5	5	5	5	3	5	0.477276	3.75	5	4	5.5	0.659338	-0.714924
323	14	20	0	5	5	1	4	5	5	4	3	4	5	4.16667	4	-1.88164	4.5	5	4.25	12.5	0.659338	-1.25598
324	14	20	0	4	4	2	3	4	4	4	5	4	3	3.5	4	1.06604	4	4.66667	4.25	4	0.120529	-0.310326
325	14	21	0	4	4	5	4	4	4	3	3	3	3	4.16667	3	1.49067	3	4.66667	3.25	2.5	0.120529	-0.323142
326	14	21	0	3	3	4	4	4	2	3	3	3	3	3.33333	3	1.13354	3.25	5	3.25	3.66667	-0.417068	-0.569438
327	14	21	0	4	4	5	5	5	4	4	4	4	4	4.5	4	-0.00138738	4.75	5	4	1.16667	-0.417068	-0.138604
328	15	21	0	3	4	3	3	3	3	4	3	4	4	3.16667	3.75	-0.115882	3.25	4	3.75	3	0.0977617	-0.629333
329	14	21	0	3	2	3	4	5	2	4	5	4	5	3.16667	4.5	0.796808	3.5	5	4.5	7	0.659338	-0.243526
330	14	21	0	4	4	2	1	3	4	4	2	3	4	3	3.25	-1.73105	2.25	-99	4.5	1.64167	-0.417068	-1.16959
331	14	21	0	4	2	2	4	4	2	3	4	4	5	3	4	0.633208	4	5	2.75	0.75	-0.417068	-1.73948
332	14	21	0	4	4	2	4	4	4	4	5	4	5	3.66667	4.5	0.295062	3.5	4.33333	4.25	4.33333	0.659338	-0.770708
333	14	21	0	4	4	3	4	3	4	3	5	4	4	3.66667	4	3.57884	3.75	4.66667	4.25	4	0.120529	-0.342732
334	14	21	0	5	4	3	5	5	4	5	4	5	4	4.33333	4.5	2.50754	5	5	4.5	3.91667	0.120529	0.158887
335	14	21	0	5	5	1	3	5	5	3	3	4	4	4	3.5	0.303522	3.5	5	5	3.5	0.120529	-0.53896
336	14	21	0	4	5	5	4	4	5	4	5	5	5	4.5	4.75	0.718332	4.5	5	5	17	0.659338	-0.594071
337	14	21	0	5	4	4	5	4	4	5	5	5	5	4.33333	5	0.830363	5	5	4.75	5.5	0.120529	-0.731528
338	14	21	0	4	4	3	4	3	4	4	4	3	3	3.66667	3.5	1.11687	2.5	5	3.5	3.5	1.1993	-0.404361
339	15	21	0	4	4	2	2	3	4	2	2	2	2	3.16667	2	-1.6942	3.5	4	2.75	3.75	0.629774	-0.0229009
340	14	21	0	2	3	1	1	2	1	3	1	1	1	1.66667	1.5	0.773735	2.75	3.66667	2.25	2.75	-0.417068	-1.94255
341	15	21	0	2	3	3	2	4	3	3	2	2	3	2.83333	2.5	-0.390806	3.5	3.66667	3.5	1	0.0977617	-0.296885
342	14	21	0	3	1	4	2	5	3	5	4	4	4	3	4.25	-1.48475	4.25	4.33333	4.25	0.666667	0.120529	-0.610002
343	14	21	0	4	3	3	2	3	4	4	2	3	3	3.16667	3	-0.0881157	3.25	4.33333	3	1.5	0.120529	-0.635437
344	15	21	0	4	3	3	4	2	3	4	4	5	4	3.16667	4.25	-0.131132	3.75	3.66667	4.75	8	0.629774	-0.0902645
345	15	22	0	2	2	1	2	5	4	3	5	5	5	2.66667	4.5	-0.0831975	5	4.66667	5	3.33333	0.0977617	-1.73951
346	15	22	0	4	4	4	4	3	4	3	2	2	3	3.83333	2.5	-1.22053	2.5	4.5	2.75	-99	-99	-99
347	15	22	0	4	3	3	3	3	3	4	2	3	3	3.16667	3	1.13829	3.5	4.33333	3	2.5	-99	-99
348	14	22	0	4	4	2	1	2	3	4	4	4	4	2.66667	4	-0.0208701	3.5	4.33333	3.5	13	0.120529	-1.17935
349	14	22	0	2	3	2	3	2	4	3	2	3	4	2.66667	3	-1.26599	1.5	3.33333	2.25	1	1.1993	-1.44258
350	14	22	0	4	4	2	2	4	5	3	1	2	2	3.5	2	-0.0998916	3.25	4	3.25	0	0.120529	-1.75269
351	15	22	0	3	3	4	3	4	3	2	3	3	3	3.33333	2.75	0.279451	2.5	4.33333	3.25	1.5	0.629774	-1.31644
352	15	22	0	3	3	3	3	2	4	4	3	3	3	3	3.25	-1.15692	1.5	4	2.25	0	0.0977617	-0.985673
353	14	22	0	2	1	1	2	1	4	2	1	1	1	1.83333	1.25	-0.78367	2.25	4.33333	2.5	0	0.120529	-1.6072
354	14	22	0	3	3	2	3	2	4	3	2	4	2	2.83333	2.75	-0.482926	2.75	3.66667	2.5	0	0.120529	-1.32484
355	14	22	0	3	3	3	4	4	4	3	4	4	4	3.5	3.75	0.894736	3.75	4.33333	3.75	1	-0.417068	-2.19473
356	15	22	0	4	2	3	4	5	3	5	3	4	4	3.5	4	1.73438	4.25	5	4.25	0	1.16293	-0.157252
357	14	22	0	3	4	2	3	1	4	4	2	3	2	2.83333	2.75	1.11877	3.5	4.33333	4.25	1	0.659338	-1.98443
358	15	22	0	4	4	1	5	5	5	5	5	4	4	4	4.5	-0.385281	5	5	4.25	5.25	1.16293	-0.994376
359	15	22	0	5	3	5	4	4	3	5	5	5	5	4	5	1.45872	4.25	5	4.5	5	-99	-99
360	15	22	0	2	2	1	1	2	2	3	3	3	3	1.66667	3	0.76161	3.25	5	4	4	-99	-99
361	15	23	0	2	1	1	2	4	4	3	1	2	4	2.33333	2.5	0.36692	1.25	5	2.25	2	-0.962614	-0.948847
362	14	23	0	4	4	3	3	2	4	3	2	2	3	3.33333	2.5	0.597181	3	5	3.5	3	0.659338	-0.819847
363	15	23	0	5	3	4	3	4	3	4	3	4	4	3.66667	3.75	2.1164	4	4.66667	4.5	16	2.23247	0.336168
364	14	23	0	2	4	2	1	4	3	3	4	4	4	2.66667	3.75	2.77127	3.5	5	4.5	4	0.659338	-0.321887
365	15	23	0	4	4	3	4	3	4	5	5	5	5	3.66667	5	-0.498184	3	5	4.75	3	0.629774	0.058268
366	15	23	0	4	3	4	5	5	5	4	5	5	5	4.33333	4.75	0.562341	4	5	5	5	0.629774	0.882951
367	14	23	0	5	4	2	4	5	5	3	3	4	5	4.16667	3.75	-0.518662	4.75	5	4.75	11.5	0.120529	-0.0676899
368	14	23	0	5	3	3	5	4	4	3	2	3	2	4	2.5	0.395654	3.75	5	4.25	4.5	-0.417068	-0.859155
369	14	23	0	2	3	3	2	2	3	3	2	3	3	2.5	2.75	-1.0288	2.25	4.66667	2.25	0	-0.417068	-1.94188
370	14	23	0	2	4	2	1	2	2	3	2	2	4	2.16667	2.75	-0.983659	1.75	2	2.75	0	-0.953393	-1.83869
371	13	23	0	3	4	2	3	3	3	3	2	2	2	3	2.25	-1.45539	3.5	4	3.75	4	-0.398651	-0.296165
372	14	23	0	4	4	2	2	5	4	5	5	5	5	3.5	5	-0.766918	4.25	5	4.5	6	1.74037	0.305046
373	14	23	0	3	2	2	4	1	2	4	3	4	4	2.33333	3.75	-0.320578	4	4.33333	4	1	-0.953393	-1.31768
374	14	23	0	3	2	1	2	2	2	3	3	3	3	2	3	-1.03908	4.25	4.66667	3.5	3	-0.417068	-1.07597
375	15	23	0	4	3	2	3	3	4	4	4	4	4	3.16667	4	0.472338	2.75	4.66667	3.5	2.25	0.0977617	-0.852627
376	15	23	0	4	5	3	2	5	4	1	1	1	1	3.83333	1	0.0962312	2.25	4	1.75	0	-99	-99
377	14	23	0	4	5	3	3	4	4	4	4	3	3	3.83333	3.5	-0.194446	3.5	5	4.25	4.33333	2.82565	0.40631
378	15	23	0	4	2	1	2	3	3	3	2	2	3	2.5	2.5	0.732384	3.25	4	2.5	0	0.629774	-0.981441
379	15	23	0	3	4	1	3	4	2	2	2	2	2	2.83333	2	0.320684	2.5	4.33333	3.5	1.75	-0.433055	-0.995305
380	14	23	0	4	3	2	3	4	4	4	4	4	2	3.33333	3.5	-0.433388	3.25	3.33333	2.75	4.5	0.659338	-1.34404
381	15	24	0	3	3	2	4	4	2	3	4	3	3	3	3.25	0.259378	2.75	5	4	4	-0.433055	-0.4043
382	14	24	0	4	4	3	2	3	4	4	4	4	3	3.33333	3.75	0.765297	2.75	5	2.75	-99	0.659338	0.247206
383	14	24	0	4	4	3	2	5	5	4	3	4	4	3.83333	3.75	1.71272	4.25	5	4	-99	-0.953393	-0.246641
384	15	24	0	4	2	1	2	2	1	2	3	3	2	2	2.5	-2.24229	2.5	3.66667	2.75	0	-0.433055	-0.245383
385	15	24	0	4	3	4	3	4	3	2	2	2	2	3.5	2	1.18976	2.5	4	3	0	-0.962614	-0.420656
386	14	24	0	3	4	2	2	4	4	3	3	3	3	3.16667	3	1.82265	3	4.66667	4	0	-0.417068	-0.815931
387	14	24	0	4	5	5	3	5	5	4	3	3	4	4.5	3.5	2.7888	2.75	4.66667	4	12	1.74037	0.197266
388	14	24	0	3	4	3	2	5	3	3	5	4	4	3.33333	4	2.65969	3.25	5	3.25	7.5	1.1993	0.847903
389	14	24	0	4	4	2	2	4	3	2	3	3	3	3.16667	2.75	0.923649	2.75	4.66667	3.25	3	0.120529	0.189236
390	14	24	0	3	5	4	3	4	3	2	4	4	4	3.66667	3.5	0.591228	3.25	5	3.75	3	0.659338	-0.219822
391	14	24	0	4	4	3	3	4	3	3	3	4	3	3.5	3.25	0.743109	4	4.66667	3	6	1.74037	0.707588
392	14	24	0	4	3	3	4	3	3	5	5	5	5	3.33333	5	-0.0191593	3.5	5	4.25	6.33333	-0.953393	-0.962347
393	14	24	0	4	5	3	4	4	5	3	2	3	3	4.16667	2.75	-1.04862	3	4.33333	3	0	-0.417068	-0.433236
394	14	24	0	4	3	2	3	5	4	3	3	3	3	3.5	3	-1.2411	2.5	4	3.5	1.25	0.120529	-0.478261
395	14	24	0	4	5	3	4	4	4	3	3	3	4	4	3.25	0.585532	4.5	5	4.25	8.5	0.659338	-0.289005
396	14	24	0	4	3	2	4	3	3	3	2	3	2	3.16667	2.5	-1.13205	4	4.66667	3.5	1	-0.953393	-0.598986
397	14	24	0	4	3	2	3	2	3	5	5	5	5	2.83333	5	0.196838	5	5	5	10	1.1993	1.79982
398	14	24	0	4	4	-99	5	-99	4	4	4	4	5	4.25	4.25	1.17244	4.5	5	4.75	9.75	2.82565	0.167787
399	15	24	0	-99	5	4	4	4	5	5	5	5	5	4.4	5	0.372308	5	5	4.75	10.25	3.30603	0.838352
400	14	24	0	4	5	3	4	5	5	4	5	5	5	4.33333	4.75	1.71911	3.5	5	4.5	6.66667	2.2825	0.791318
401	15	24	0	4	2	3	3	3	3	3	3	3	3	3	3	0.806064	3.75	5	3.25	1.16667	0.0977617	-0.437388
402	14	24	0	4	4	1	3	3	5	3	2	2	2	3.33333	2.25	0.35181	3	4	3.5	-99	1.1993	-0.893292
403	14	24	0	3	2	1	3	3	3	3	3	3	2	2.5	2.75	0.93374	3.25	3.66667	2.25	4.5	1.1993	-0.160053
404	-99	24	0	-99	-99	-99	-99	-99	-99	-99	-99	-99	-99	-99	-99	-99	-99	-99	-99	-99	-99	-99
405	14	25	0	3	3	2	2	4	2	5	4	5	5	2.66667	4.75	-0.138309	3	5	4.25	3	1.1993	-0.699507
406	14	25	0	3	2	1	4	1	3	1	4	3	1	2.33333	2.25	-0.240601	1.25	3.66667	1.25	2.41667	-99	-3.05409
407	15	25	0	4	4	2	4	4	5	3	3	2	3	3.83333	2.75	1.46845	3	5	4.25	5.66667	1.16293	0.119343
408	15	25	0	5	4	4	3	4	5	4	4	5	5	4.16667	4.5	0.624635	3.75	5	4.75	7.5	0.629774	-0.36947
409	14	25	0	4	5	2	4	3	4	5	5	3	5	3.66667	4.5	0.744117	2.75	5	4.25	4.75	0.120529	-0.762134
410	14	25	0	4	5	3	5	5	5	5	4	5	4	4.5	4.5	0.533636	3.25	5	4.25	2.5	-99	-99
411	15	25	0	5	5	1	2	2	3	5	4	5	5	3	4.75	1.37572	4.5	5	4.75	3.5	1.16293	-0.360017
412	14	25	0	4	3	2	3	3	4	3	2	4	3	3.16667	3	-0.964153	3.25	4.66667	4	2	-0.417068	-1.38747
413	15	25	0	4	4	2	3	4	4	4	3	3	3	3.5	3.25	0.200915	4.25	4.66667	3.75	5.66667	0.629774	-0.517627
414	14	25	0	4	3	2	4	4	4	1	1	1	1	3.5	1	-0.14297	1.75	3.66667	2	2	1.1993	-0.263373
415	14	25	0	1	1	3	2	3	2	2	2	1	2	2	1.75	-1.32736	1	4	1	0	-0.417068	-1.16442
416	14	25	0	4	4	2	2	2	2	5	5	4	4	2.66667	4.5	-0.453639	3.25	5	4.25	9.91667	1.74037	-0.974293
417	15	25	0	3	4	4	4	4	4	4	4	4	4	3.83333	4	-2.2777	2.75	4	3	1.25	0.0977617	-1.28515
418	16	25	0	4	3	3	5	5	1	4	3	3	3	3.5	3.25	0.875685	3.25	5	2.5	11	0.0723857	-1.27603
419	15	25	0	3	3	1	4	4	4	2	4	1	2	3.16667	2.25	1.23955	2.75	4	3.25	4	0.0977617	-1.70561
420	15	25	0	4	5	3	5	4	4	4	4	4	4	4.16667	4	-0.36032	3.25	4.33333	4	3	0.0977617	-1.73951
421	15	25	0	4	3	4	3	4	2	5	2	4	5	3.33333	4	1.75328	4.75	5	4.5	1.66667	0.0977617	-1.59826
422	14	26	1	5	5	3	4	5	5	4	5	4	5	4.5	4.5	-0.79534	4.25	5	4.5	5.75	0.0280641	0.105672
423	14	26	1	3	2	2	2	3	4	2	2	3	2	2.66667	2.25	2.85044	3.5	4.33333	4	0.5	0.0280641	0.124162
424	15	26	1	3	2	2	2	2	2	4	4	4	4	2.16667	4	-2.00041	3	4.66667	2.75	9	-99	-99
425	14	26	1	4	4	2	3	3	4	2	1	1	2	3.33333	1.5	-0.070829	1.25	4	1.75	1.5	0.807764	0.0243973
426	14	26	1	4	3	2	3	4	3	3	2	2	2	3.16667	2.25	-0.966022	2	3.66667	3	3	0.807764	0.0454484
427	14	26	1	3	-99	3	2	3	2	3	2	2	2	2.6	2.25	-0.197515	2.25	3.66667	3	0.5	-0.751352	-0.58115
428	15	26	1	2	3	2	2	3	5	4	2	3	4	2.83333	3.25	-2.66001	2.25	3.66667	2.75	2.41667	1.02684	-0.968877
429	15	26	1	4	3	2	4	4	3	5	5	4	5	3.33333	4.75	2.84743	3.75	5	4	8.16667	1.02684	0.708597
430	14	26	1	4	2	1	4	3	5	3	4	-99	-99	3.16667	-99	0.260017	3.25	5	3.5	8	0.41788	0.482556
431	15	26	1	4	4	4	5	4	5	4	4	4	4	4.33333	4	1.93045	3.66667	4.66667	4.5	10.5	1.40144	0.356522
432	14	26	1	4	4	2	5	3	5	5	4	5	5	3.83333	4.75	0.395616	3.5	5	3.5	3.75	0.807764	-0.510448
433	14	26	1	4	4	4	5	5	5	5	3	4	4	4.5	4	-1.08409	3.75	4	3.75	7.16667	0.807764	0.666016
434	15	26	1	4	4	4	3	4	4	3	3	3	3	3.83333	3	1.78867	3.75	4.33333	3.25	3.75	1.7761	0.176654
435	14	26	1	5	4	3	2	4	4	5	3	3	4	3.66667	3.75	-0.0489595	4.25	5	5	7	0.807764	0.38105
436	15	26	1	4	4	2	3	4	4	2	3	3	3	3.5	2.75	-0.333704	2.5	4.66667	4	4.5	1.7761	0.398491
437	15	26	1	4	5	1	1	3	4	4	5	4	4	3	4.25	0.946343	3	5	4.25	5	-99	-99
438	14	26	1	3	3	2	2	4	4	4	4	3	3	3	3.5	-0.727195	3	4.33333	3.5	5	-1.14094	-1.4196
439	14	26	1	4	4	2	2	4	4	3	5	3	4	3.33333	3.75	-0.138947	3.25	5	3.75	4.33333	-99	-99
440	14	26	1	3	2	4	4	2	3	3	4	3	4	3	3.5	0.534459	3	4.66667	3.25	0	0.0280641	-0.0350765
441	15	26	1	3	3	3	4	3	4	4	3	4	4	3.33333	3.75	-1.80654	3.25	4	3.75	2	0.277821	-0.48499
442	14	26	1	4	3	2	2	4	3	3	3	3	3	3	3	-0.430016	4	5	4	8	1.58772	0.928794
443	16	27	1	3	4	2	2	4	3	3	3	3	3	3	3	-0.687669	2.75	4	3	3.16667	0.168771	-1.41454
444	14	27	1	4	5	3	4	5	3	4	3	3	4	4	3.5	-0.524394	3.75	5	4	6.66667	0.41788	0.397348
445	15	27	1	5	4	4	3	3	4	4	5	4	4	3.83333	4.25	-0.588946	4	4.66667	4.75	12.8333	1.02684	0.170083
446	15	27	1	4	4	5	4	4	4	4	3	4	3	4.16667	3.5	-0.235677	3.75	4.33333	3.25	1.5	-0.470937	0.00709798
447	15	27	1	2	2	2	3	4	4	3	2	2	3	2.83333	2.5	0.154583	3.75	4.66667	3.75	3	-0.470937	-0.430058
448	14	27	1	3	4	2	3	4	2	4	3	3	3	3	3.25	-0.26833	3.75	5	4	3.5	-1.14094	-0.503046
449	14	27	1	4	4	4	4	4	4	4	5	4	5	4	4.5	0.764971	4.25	4.66667	5	4.75	0.807764	0.243326
450	15	27	1	5	5	4	4	4	4	3	4	4	5	4.33333	4	-0.353006	4.25	4.66667	4	15	1.7761	-0.0728637
451	14	27	1	3	2	2	2	3	3	4	4	4	4	2.5	4	-0.189169	3	4.66667	4.25	4.75	0.41788	0.192303
452	15	27	1	5	4	3	5	4	5	4	4	4	3	4.33333	3.75	2.02312	3.5	5	4	5.91667	1.40144	0.366048
453	14	27	1	4	2	2	3	4	4	3	2	3	4	3.16667	3	-0.578621	2.75	5	3.25	5.16667	1.19771	0.114498
454	14	27	1	4	2	3	4	3	4	4	3	4	4	3.33333	3.75	1.12502	3.75	4.66667	3.5	5.25	0.807764	0.403613
455	14	27	1	4	3	2	2	4	3	4	3	3	3	3	3.25	-0.428096	3.75	4.66667	3.5	1.83333	0.0280641	0.482022
456	14	27	1	4	4	3	2	4	3	4	3	3	3	3.33333	3.25	1.55821	4.5	4.66667	3.75	2.25	-0.361681	0.375389
457	14	27	1	4	3	4	4	4	4	4	4	4	4	3.83333	4	2.07241	4	4.33333	3.75	2.625	0.807764	-1.00876
458	15	28	1	-99	-99	-99	-99	-99	-99	-99	-99	-99	-99	-99	-99	-99	-99	-99	-99	-99	-0.470937	-1.40073
459	15	28	1	2	5	2	2	5	4	4	2	4	4	3.33333	3.5	2.43499	4	4	3.25	1.58333	-0.470937	-0.701759
460	14	28	1	3	3	2	2	2	3	4	5	5	5	2.5	4.75	-1.34176	2.5	3.66667	5	5	0.41788	1.3619
461	14	28	1	4	3	2	3	4	4	3	3	3	3	3.33333	3	-0.744053	3.75	5	4.5	6.33333	0.41788	1.19413
462	14	28	1	5	4	4	5	4	5	4	3	4	5	4.5	4	-1.51722	4	5	5	6.91667	0.0280641	-0.319884
463	14	28	1	2	4	2	4	4	2	4	4	-99	3	3	3.66667	0.925248	4	5	4	1.875	0.41788	0.528362
464	14	28	1	4	3	3	5	3	4	4	5	4	4	3.66667	4.25	-0.685578	3.25	5	3.5	4.75	0.41788	-0.357169
465	15	28	1	4	4	2	3	4	4	4	2	3	2	3.5	2.75	-0.0285071	4.75	5	5	3.33333	0.277821	1.13798
466	15	28	1	3	3	2	1	1	4	2	2	1	1	2.33333	1.5	-0.977385	1.75	5	3.25	4	-1.59353	-1.61659
467	14	28	1	5	5	5	4	5	4	4	3	3	5	4.66667	3.75	4.86988	4	5	5	11.6667	1.58772	0.961772
468	14	28	1	4	5	4	3	5	3	3	3	3	4	4	3.25	0.924907	4.5	4.66667	3.5	1.66667	-0.361681	0.000620586
469	14	28	1	4	4	4	3	4	4	5	5	5	5	3.83333	5	-0.537076	3.5	4.66667	4.25	10.25	0.807764	0.559078
470	15	28	1	4	4	3	4	3	3	3	4	3	2	3.5	3	-1.36168	1.5	4.66667	2.5	3.16667	0.652299	-0.154562
471	14	28	1	3	3	4	1	5	4	5	1	1	1	3.33333	2	-1.66373	1.5	4.33333	3.25	6.16667	0.0280641	0.849477
472	14	28	1	3	2	1	2	2	2	2	1	2	2	2	1.75	-1.771	2.25	4	2.5	0.75	0.41788	0.441197
473	15	28	1	2	4	1	2	3	3	3	1	1	1	2.5	1.5	-2.34905	1	3.66667	2.5	1.16667	-0.845211	-0.505311
474	15	28	1	4	5	2	4	4	3	4	4	3	3	3.66667	3.5	-0.0704101	3.75	5	4.25	3	1.02684	-0.11929
475	15	28	1	4	3	2	3	4	4	3	4	4	3	3.33333	3.5	1.25396	4	4.66667	4.25	8.5	1.40144	0.456071
476	14	28	1	4	3	2	3	3	4	4	5	4	4	3.16667	4.25	-1.65602	4.5	3.33333	3.5	9	0.807764	-0.0846571
477	15	28	1	4	4	1	1	1	4	3	2	2	4	2.5	2.75	2.97236	2.25	5	2.75	0	-0.470937	0.0853048
478	15	28	1	4	4	4	4	4	4	4	4	4	4	4	4	-0.575348	4.25	5	3.75	5.08333	0.277821	0.957631
479	14	28	1	3	4	3	2	3	3	3	2	2	2	3	2.25	-2.12638	3.25	4	3	0	-99	-99
480	14	28	1	4	4	5	4	3	3	5	3	3	4	3.83333	3.75	1.72068	1.75	4.33333	3.5	6.5	-99	-99
481	15	29	1	3	4	3	3	4	5	4	4	4	3	3.66667	3.75	-3.28508	3.75	4.66667	3.5	2	-0.0965922	-1.84767
482	15	29	1	4	4	2	2	4	4	4	3	4	3	3.33333	3.5	-0.932802	3	5	4.5	18.33	0.277821	-1.17788
483	15	29	1	4	4	2	3	4	4	4	3	3	4	3.5	3.5	-0.283134	3.75	5	3.25	3	-0.845211	-1.47267
484	14	29	1	4	4	3	3	4	4	4	2	4	4	3.66667	3.5	-1.63439	3.5	4.66667	3.5	4.83333	-99	-99
485	14	29	1	4	5	5	4	4	4	5	5	4	4	4.33333	4.5	-0.308079	4	4.66667	4.75	6.5	-99	-99
486	14	29	1	4	4	2	4	4	4	4	2	2	2	3.66667	2.5	-1.32695	3.5	4.66667	3.5	6.66667	-1.53046	-3.17308
487	15	29	1	3	4	2	3	4	4	4	3	4	4	3.33333	3.75	-1.97896	2.75	5	3	5	-0.470937	-3.3305
488	14	29	1	4	4	5	4	4	4	3	4	3	3	4.16667	3.25	0.632381	3.25	4.33333	4	8	0.807764	-1.55944
489	15	29	1	5	3	4	4	4	4	5	4	4	4	4	4.25	0.0759846	1.75	4.66667	3.5	5	-0.0965922	-1.35003
490	14	29	1	5	5	5	5	5	5	5	5	5	5	5	5	1.3809	5	5	5	18.3333	1.19771	-0.63941
491	14	29	1	4	4	4	4	4	4	-99	5	5	5	4	5	0.383224	3.75	5	5	5.83333	0.807764	-1.16217
492	14	29	1	4	5	5	4	4	5	5	5	5	5	4.5	5	0.702982	5	5	5	15.1667	1.58772	-0.615188
493	14	29	1	3	3	3	3	4	3	3	3	2	3	3.16667	2.75	0.794815	4	5	4.25	10.6667	1.58772	-0.227662
494	15	29	1	4	5	4	3	4	5	4	5	4	4	4.16667	4.25	-0.176372	4.5	4.66667	4.5	9.25	-99	-99
495	15	29	1	5	5	-99	5	5	5	5	5	5	5	5	5	-1.97051	3.75	4.66667	5	4	-99	-99
496	15	29	1	4	5	2	4	3	3	5	4	5	4	3.5	4.5	-1.78336	3.75	5	4.25	8	0.652299	-0.296867
497	14	29	1	4	4	4	2	3	2	4	4	4	4	3.16667	4	-1.90987	2.5	5	4.5	-99	0.0280641	-0.921282
498	14	29	1	4	4	5	4	4	4	2	1	1	2	4.16667	1.5	-0.706904	2.75	4	2.75	0.416667	-1.14094	-2.56134
499	14	29	1	5	5	5	5	5	5	4	5	5	5	5	4.75	1.31044	4	5	4.75	5.25	1.58772	-0.559419
500	-99	29	1	-99	-99	-99	-99	-99	-99	-99	-99	-99	-99	-99	-99	-99	-99	-99	-99	-99	-99	-99
501	14	30	1	4	5	4	4	5	4	5	5	5	5	4.33333	5	-0.255831	5	5	5	8	1.58772	0.232454
502	15	30	1	4	5	3	2	5	3	2	2	2	2	3.66667	2	-0.440432	2	4	2.75	4.66667	0.277821	-1.25692
503	14	30	1	3	4	2	1	4	2	3	3	4	4	2.66667	3.5	0.81697	3	4	3.75	5	0.807764	-0.678208
504	14	30	1	4	3	3	4	3	4	4	3	3	3	3.5	3.25	-1.1817	4	4.33333	4	5.33333	-0.751352	-1.67331
505	14	30	1	4	4	3	2	5	3	2	4	2	4	3.5	3	-0.794029	3	5	3.5	5.91667	-0.361681	-2.16188
506	14	30	1	4	2	2	4	2	4	3	4	3	4	3	3.5	0.491429	2.75	4.66667	3.5	4.5	0.0280641	-0.886798
507	15	30	1	3	3	2	4	3	4	4	4	3	4	3.16667	3.75	-0.235084	3.25	4.66667	2.75	-99	-0.0965922	-0.392316
508	14	30	1	4	3	4	4	4	4	4	3	3	3	3.83333	3.25	-0.402894	3	4.66667	3.5	8	-0.361681	-1.00128
509	15	30	1	5	4	4	5	5	5	2	5	5	5	4.66667	4.25	-0.0588697	5	4.66667	4.5	14	-0.470937	0.265174
510	15	30	1	4	4	2	4	4	4	5	2	3	3	3.66667	3.25	-1.32265	2.75	5	1.75	3.5	0.277821	-0.737945
511	15	30	1	2	1	1	2	4	2	3	2	2	3	2	2.5	-0.835944	2.5	4.33333	2.75	0	0.277821	-0.718948
512	14	30	1	4	2	4	1	5	5	2	3	2	3	3.5	2.5	-0.896456	1.5	4.33333	3.75	0	0.0280641	-1.13358
513	15	30	1	5	3	1	1	5	5	4	2	2	4	3.33333	3	0.0219464	3.25	4	3.5	2	-0.0965922	-0.860591
514	15	30	1	3	3	2	2	2	3	3	2	2	2	2.5	2.25	0.184559	2	4.66667	2.75	0	-0.470937	-2.21759
515	14	30	1	3	3	2	2	3	4	4	4	4	4	2.83333	4	-1.52665	2.5	5	3	11.1667	0.807764	-0.575113
516	14	30	1	4	3	3	3	3	3	4	4	4	4	3.16667	4	0.167403	3.5	4.66667	4	3.5	0.0280641	-2.03925
517	14	30	1	5	4	2	1	4	5	4	5	3	4	3.5	4	0.03433	3.75	4.66667	4.5	7.33333	0.807764	-0.186843
518	15	30	1	3	4	3	4	4	4	4	3	3	3	3.66667	3.25	-1.45949	3	5	4	3.83333	0.277821	-1.28328
519	14	31	1	2	4	2	3	4	5	2	1	2	3	3.33333	2	-3.23288	2.25	3.66667	3.75	9	-2.30921	-1.82229
520	16	31	1	3	3	1	2	1	3	3	3	4	2	2.16667	3	1.53355	2.75	4	3.75	1.33333	-0.194943	-2.61169
521	14	31	1	3	3	4	3	3	4	4	4	4	4	3.33333	4	-0.456039	3.25	4.33333	4.25	4.83333	0.0280641	-0.217933
522	14	31	1	5	5	4	4	3	5	5	5	5	5	4.33333	5	-0.780013	3.25	5	5	18.33	0.807764	-0.667336
523	15	31	1	4	4	3	5	5	5	4	5	3	4	4.33333	4	2.86287	2.75	5	4.75	12.5	1.02684	0.356522
524	14	31	1	4	3	4	3	4	2	3	1	3	3	3.33333	2.5	0.0933116	2.5	3.66667	2.75	4.5	1.58772	0.199172
525	15	31	1	4	3	3	5	3	5	4	4	5	4	3.83333	4.25	-0.502117	2	4.66667	3.5	2	0.277821	-0.971956
526	14	31	1	5	5	5	4	5	4	5	4	4	4	4.66667	4.25	0.496757	3.25	4.33333	4.25	6.25	0.807764	-0.136729
527	14	31	1	4	4	3	5	4	4	4	3	3	4	4	3.5	0.561921	4.5	4.33333	5	13.5	0.807764	0.243396
528	15	31	1	5	2	1	4	5	4	5	5	5	5	3.5	5	0.664258	2.25	4.66667	4.5	5	1.02684	-0.351852
529	14	31	1	5	3	4	3	3	3	5	5	5	5	3.5	5	1.24124	2.75	5	3.5	12	1.19771	0.794006
530	14	31	1	3	4	2	2	4	5	3	3	3	4	3.33333	3.25	0.453723	2.5	4.66667	3.75	17.67	1.58772	0.401656
531	14	31	1	3	3	3	2	5	2	3	2	2	3	3	2.5	-0.304285	2.5	4.33333	3.25	5.33333	-0.751352	0.214726
532	14	31	1	5	5	5	5	5	5	4	4	4	5	5	4.25	1.63043	4	5	5	4	-99	-99
533	14	31	1	5	4	3	3	3	4	4	4	2	3	3.66667	3.25	-0.591285	3.25	3.66667	4	6	0.807764	-0.455352
534	14	31	1	4	5	2	4	4	3	5	3	4	5	3.66667	4.25	-0.270972	3.5	4.66667	4.75	6.16667	1.9778	0.00439481
535	16	31	1	3	4	4	4	5	4	3	3	3	3	4	3	-1.79973	3.5	5	4.75	7	0.532549	-1.44022
536	15	31	1	2	3	3	4	5	4	2	2	2	3	3.5	2.25	-1.54295	2.25	-99	3.5	2.91667	-0.845211	-0.63682
537	14	31	1	-99	-99	-99	-99	-99	-99	-99	-99	-99	-99	-99	-99	-99	-99	-99	-99	-99	-0.751352	-0.80499
538	14	32	1	3	4	2	3	5	4	4	3	3	5	3.5	3.75	-1.21835	2.5	5	4.75	6.5	1.58772	0.655748
539	14	32	1	4	3	1	3	4	3	4	3	3	3	3	3.25	1.45415	1.75	4.66667	3.25	2	-0.361681	-0.100352
540	15	32	1	4	4	1	3	5	5	5	5	5	3	3.66667	4.5	-0.194918	4.5	5	4.75	1.75	-0.0965922	-0.518453
541	14	32	1	1	2	2	1	2	2	4	1	1	1	1.66667	1.75	0.846315	1	4	2.5	2.5	-0.361681	0.203245
542	14	32	1	3	4	3	4	3	5	4	4	4	3	3.66667	3.75	0.0767129	4.5	5	4.25	10	1.19771	0.459688
543	13	32	1	4	4	4	4	4	5	4	3	4	4	4.16667	3.75	0.616153	3.5	4.66667	3.75	3.5	-0.192911	0.851785
544	14	32	1	4	4	3	4	3	3	4	4	4	4	3.5	4	-0.314158	3.25	4.33333	4.25	7.125	-0.751352	-1.56917
545	14	32	1	5	5	5	5	5	5	5	5	5	5	5	5	-0.559004	4.75	5	4.5	7.5	1.19771	0.191325
546	14	32	1	4	5	5	5	5	5	5	5	5	5	4.83333	5	1.18624	4.25	5	4.75	15	1.58772	0.83227
547	14	32	1	3	2	2	2	1	3	3	3	3	2	2.16667	2.75	0.28178	1.75	4.66667	2.75	11	-0.361681	-0.211973
548	15	32	1	4	3	2	3	4	3	4	2	4	2	3.16667	3	-0.489025	3	5	4.25	3	-0.845211	-1.83807
549	13	32	1	3	4	4	4	4	4	4	3	3	4	3.83333	3.5	-0.865606	2	4.33333	3.5	2.25	1.04398	-0.736425
550	15	32	1	3	3	1	3	2	4	3	4	4	2	2.66667	3.25	-0.750661	2.25	4	3.5	2	-0.470937	-1.28267
551	14	32	1	4	4	2	4	3	4	5	2	4	5	3.5	4	0.507055	3.25	4.33333	4	11.5	1.19771	0.0385797
552	14	32	1	4	4	3	4	4	5	5	5	4	5	4	4.75	-1.21647	3.75	5	4.5	8.06667	1.19771	0.106346
553	14	32	1	5	5	3	3	5	5	4	5	5	5	4.33333	4.75	0.0828854	4.25	5	5	10.75	0.0280641	1.22674
554	14	32	1	4	4	1	3	5	3	5	5	5	5	3.33333	5	-0.957411	3	5	5	15.2917	1.9778	0.617789
555	14	32	1	4	4	4	3	3	4	5	5	4	5	3.66667	4.75	-2.21223	3	5	4.75	8.5	1.19771	-0.486671
556	14	32	1	5	4	4	5	5	5	5	4	5	5	4.66667	4.75	-0.567425	4.25	5	4	5.16667	0.0280641	-0.426149
557	15	32	1	4	4	3	4	3	4	4	4	4	4	3.66667	4	-0.550952	3.75	5	4.25	4.83333	0.652299	-0.0934181
558	14	32	1	4	2	2	3	3	4	2	2	3	4	3	2.75	-0.306358	3	4.33333	3.75	7.375	1.19771	0.255551
559	14	32	1	4	5	4	1	5	4	3	5	4	3	3.83333	3.75	-1.10607	2	4.66667	3.5	3.5	0.807764	0.310183
560	15	33	1	4	4	3	3	3	3	2	2	2	4	3.33333	2.5	0.0182431	2.75	4.33333	3	1.5	-0.845211	-0.741615
561	14	33	1	4	4	3	3	4	4	5	5	4	4	3.66667	4.5	-0.570928	4.5	5	4.5	6.5	0.0280641	-0.457239
562	14	33	1	4	4	4	3	4	4	4	3	4	4	3.83333	3.75	1.92615	4.5	4.66667	4.25	7.75	0.0280641	0.65477
563	14	33	1	4	4	3	4	4	4	5	5	5	4	3.83333	4.75	1.23231	3.5	5	3.75	9.66667	0.807764	0.430859
564	14	33	1	4	2	2	4	3	4	4	3	4	3	3.16667	3.5	-0.593003	2	4.66667	4	2.75	0.41788	0.095029
565	14	33	1	4	4	3	3	3	4	3	4	4	3	3.5	3.5	3.53194	3.75	5	4.25	1.5	-1.14094	0.121671
566	14	33	1	4	4	5	5	4	5	4	4	5	3	4.5	4	1.75564	3	5	5	4.58333	0.41788	-0.462824
567	14	33	1	3	3	3	3	3	4	4	4	3	3	3.16667	3.5	0.783276	3.25	4.66667	3.5	3	0.0280641	0.558474
568	15	33	1	4	3	4	3	4	4	3	2	4	2	3.66667	2.75	0.518956	2.25	4.33333	2.25	5.16667	-0.0965922	-1.40091
569	15	33	1	3	3	1	1	1	3	5	1	1	1	2	2	-0.85116	1.5	4.33333	3.25	1.5	0.277821	0.0974263
570	14	33	1	4	4	3	2	2	4	4	4	4	3	3.16667	3.75	0.180054	3	4.66667	4.25	2.66667	-99	-99
571	16	33	1	4	5	3	3	4	5	2	5	4	4	4	3.75	-1.21176	3.5	5	4.75	6.5	1.26028	-0.739315
572	16	33	1	5	3	3	5	4	3	4	5	4	3	3.83333	4	-2.56669	4.25	5	4.25	2	0.168771	-1.42285
573	13	33	1	5	5	5	4	5	5	5	5	5	5	4.83333	5	0.150133	5	5	5	17	-99	-99
574	14	33	1	5	4	4	5	5	5	5	3	3	4	4.66667	3.75	-1.7333	3.5	5	3.25	1	-99	-99
575	14	33	1	4	4	1	4	4	4	2	2	2	2	3.5	2	-0.542012	1.75	3.33333	1.25	1	-99	-99
576	14	34	0	4	4	3	4	4	5	3	4	4	2	4	3.25	-1.33851	3	4.66667	4.25	6	-0.417068	0.612624
577	14	34	0	4	3	2	3	3	4	3	3	2	3	3.16667	2.75	-1.99317	3.25	5	4.25	4	0.659338	-0.0324256
578	14	34	0	2	4	2	2	3	4	5	5	5	3	2.83333	4.5	1.63842	3.25	5	3.75	2.5	0.120529	0.314203
579	14	34	0	4	5	4	4	4	4	4	5	5	5	4.16667	4.75	-1.00031	3.25	4	4.25	3	1.1993	-0.0215379
580	14	34	0	4	5	2	4	5	4	5	5	4	3	4	4.25	2.05824	4.75	4.66667	4	2.5	-0.417068	0.507701
581	13	34	0	3	4	2	5	3	4	4	5	5	5	3.5	4.75	1.96585	5	5	4.5	3.16667	1.81176	0.181627
582	14	34	0	3	4	4	5	4	3	3	1	2	2	3.83333	2	0.471917	3.75	4.66667	3.75	2	-0.417068	0.133581
583	15	34	0	3	3	1	2	4	2	2	3	3	3	2.5	2.75	-2.89308	2	4	3.5	0	-0.433055	-0.387073
584	14	34	0	3	4	3	5	4	4	4	3	5	3	3.83333	3.75	-1.07848	2.75	4.66667	2.75	8.16667	-0.953393	-0.885589
585	15	34	0	4	3	2	4	3	5	4	4	4	4	3.5	4	1.20692	3.75	4.33333	3	0	0.629774	0.174266
586	14	34	0	3	3	3	3	4	4	5	5	5	5	3.33333	5	0.866086	3.25	4.66667	4.5	4.83333	0.659338	0.133581
587	14	34	0	-99	-99	-99	-99	-99	-99	-99	-99	-99	-99	-99	-99	-99	-99	-99	-99	-99	0.120529	-0.152349
588	14	34	0	4	4	1	3	4	3	4	3	4	5	3.16667	4	-0.535326	2.75	4	3.5	4.5	1.1993	-0.511597
589	14	34	0	3	5	2	2	4	3	4	2	3	3	3.16667	3	0.646039	2.5	5	4	2	1.74037	0.662692
590	14	34	0	3	4	3	4	4	3	4	3	4	4	3.5	3.75	-1.72116	4.5	4.66667	4.25	2.33333	1.1993	-0.0499589
591	14	34	0	5	2	4	3	5	4	5	2	5	4	3.83333	4	0.438217	4	4.66667	4.75	4.83333	1.1993	0.50253
592	14	34	0	3	4	2	2	3	3	4	2	3	3	2.83333	3	-0.202534	4	5	3.75	3	0.659338	-0.450641
593	14	34	0	4	5	3	3	4	-99	4	4	4	4	3.8	4	-0.390904	4	5	4.5	7.625	0.659338	-0.439753
594	14	34	0	4	4	5	3	4	4	4	4	4	5	4	4.25	0.0553055	4.25	5	4.75	5	0.120529	-0.402758
595	15	34	0	3	2	2	3	4	4	5	4	4	4	3	4.25	0.0396288	4	5	4.33333	11.5	-0.962614	-0.768907
596	15	34	0	2	4	2	2	2	3	3	2	2	2	2.5	2.25	0.392171	4	4	3.75	2.5	-0.433055	-0.643514
597	14	35	0	4	3	1	2	4	4	4	4	4	4	3	4	0.239118	3.25	4.66667	4.5	6	-0.417068	-0.338876
598	14	35	0	4	3	4	2	4	4	4	2	2	3	3.5	2.75	1.19967	2.5	3.66667	2.75	4	1.1993	0.415595
599	14	35	0	3	3	2	1	3	1	4	5	2	3	2.16667	3.5	-0.516859	2.75	3.66667	3.75	2	-0.953393	-0.885589
600	14	35	0	5	5	5	4	5	5	5	4	4	4	4.83333	4.25	0.444297	5	5	5	12.25	1.1993	0.144212
601	15	35	0	3	3	1	1	3	4	2	1	1	1	2.5	1.25	0.0719162	1.75	3	1.25	0	-2.01769	-0.899085
602	15	35	0	3	2	1	1	2	3	3	1	3	2	2	2.25	0.282349	2.5	5	2.75	0	-2.01769	-0.706586
603	14	35	0	2	1	1	3	2	4	4	2	3	3	2.16667	3	-0.317367	1.5	4.66667	3.25	2	0.120529	-0.153279
604	14	35	0	4	5	4	4	5	5	4	5	4	5	4.5	4.5	-0.402494	3.25	5	4	3.5	-0.417068	-0.322143
605	15	35	0	3	3	3	3	4	4	3	4	4	5	3.33333	4	-2.18624	3.25	4.66667	3.75	2	-0.433055	-1.0317
606	14	35	0	3	2	1	2	3	3	4	3	3	2	2.33333	3	0.663468	3	5	3.75	3.83333	-0.417068	-0.919854
607	14	35	0	4	4	3	4	4	3	4	1	3	5	3.66667	3.25	-0.196107	4	5	4.25	13.6667	-0.953393	-0.255215
608	14	35	0	1	4	2	5	5	5	1	1	1	1	3.66667	1	0.25943	2	5	4.5	1	-0.417068	-1.06409
609	14	35	0	4	4	5	2	5	5	3	3	4	4	4.16667	3.5	0.921674	3.5	4.66667	3.75	5	0.659338	0.0541623
610	14	35	0	4	3	2	3	3	3	3	2	2	3	3	2.5	0.808087	4	4	3.5	2	0.120529	-0.997414
611	-99	35	0	5	5	5	5	5	5	4	3	3	3	5	3.25	-0.73815	3.75	5	3.75	5	-99	-99
612	14	35	0	3	4	1	5	3	4	4	4	4	4	3.33333	4	-0.0849664	2.75	4.66667	4	4.5	-0.417068	0.0998598
613	14	35	0	4	3	4	3	4	2	4	5	5	5	3.33333	4.75	-0.485818	3.5	4.66667	4.5	6.20833	-99	-99
614	14	35	0	4	4	3	4	3	4	4	3	3	5	3.66667	3.75	-0.59657	3	4	3.5	4	-99	-99
615	14	35	0	4	4	4	3	4	5	5	5	4	5	4	4.75	-0.769658	4.25	5	4.75	4.33333	-99	-99
616	14	36	0	5	3	4	4	4	5	4	4	3	4	4.16667	3.75	2.20015	4.5	5	4	4.56667	1.1993	-0.798457
617	14	36	0	4	4	4	4	5	5	4	5	4	5	4.33333	4.5	1.75607	5	5	4	13.5	1.1993	0.524177
618	14	36	0	4	4	4	3	4	4	4	3	3	3	3.83333	3.25	-0.940984	4	3.66667	3.75	12.67	-0.417068	-99
619	14	36	0	3	4	3	2	3	3	5	3	3	4	3	3.75	-1.36795	3.5	5	3.5	0	-0.417068	-1.13911
620	15	36	0	3	5	3	2	4	5	4	3	3	4	3.66667	3.5	-2.03606	2.25	4.66667	3.25	3.33333	-0.433055	-2.21452
621	14	36	0	5	5	5	5	5	5	5	5	5	5	5	5	0.419965	5	5	5	12.67	-0.417068	-0.688619
622	14	36	0	4	5	1	5	4	2	4	4	4	4	3.5	4	-0.247425	2.75	5	3.75	2.5	-0.417068	-1.29057
623	14	36	0	4	4	3	4	4	5	4	3	3	3	4	3.25	-1.35304	4	4.33333	4.5	5.16667	0.120529	-0.699122
624	14	36	0	3	4	3	3	4	3	4	4	4	4	3.33333	4	0.713791	3	5	3.75	-99	-0.417068	-0.327187
625	14	36	0	3	3	5	4	5	4	3	4	4	5	4	4	0.376861	3	5	4.5	1.5	0.120529	-1.03798
626	14	36	0	4	4	3	4	3	4	3	3	3	4	3.66667	3.25	-0.0812977	3.5	4.66667	4	11.875	0.120529	-1.54397
627	14	36	0	4	4	4	4	4	3	5	3	5	5	3.83333	4.5	-99	-99	-99	-99	-99	0.659338	-0.413102
628	13	36	0	2	5	3	3	4	5	1	1	1	1	3.66667	1	-0.781937	3.5	4	3.25	0	-0.398651	-1.83573
629	14	36	0	2	4	2	3	5	3	4	5	3	1	3.16667	3.25	-1.21298	2.75	4	3.25	1.33333	-0.953393	-2.03011
630	14	36	0	5	4	5	4	3	4	5	5	5	5	4.16667	5	-1.59492	3.5	4.66667	4	1.5	1.1993	-0.302682
631	14	36	0	4	4	3	3	5	4	5	4	5	5	3.83333	4.75	0.761759	4	4.66667	4.5	3	0.659338	-1.27788
632	14	36	0	2	3	4	5	2	1	1	3	2	2	2.83333	2	-0.703151	4	3.66667	4	2	0.120529	-0.232767
633	14	36	0	3	4	2	3	4	3	5	5	5	3	3.16667	4.5	-0.028009	4.25	5	4.25	1	0.659338	-0.694533
634	13	36	0	5	4	3	4	5	5	3	2	2	5	4.33333	3	0.246002	4.5	5	4	4.5	-0.398651	-1.61895
635	14	37	0	4	4	2	3	4	4	3	3	3	4	3.5	3.25	-2.70303	3.25	5	4	-99	0.120529	-0.402758
636	14	37	0	4	4	2	4	2	4	2	4	2	5	3.33333	3.25	3.11817	3.75	4	3.75	2	0.659338	-1.12617
637	14	37	0	4	4	3	4	-99	5	5	3	5	-99	4	4.33333	1.21597	5	4.66667	3.5	0	0.120529	-0.128774
638	14	37	0	4	4	2	2	2	2	2	4	3	3	2.66667	3	-0.388949	3.66667	4.33333	3.5	0	0.120529	-0.478389
639	14	37	0	5	3	3	3	2	5	3	1	2	4	3.5	2.5	-2.28834	2	4.66667	4.25	5.5	-0.417068	-0.728126
640	14	37	0	4	4	1	1	4	4	3	3	2	4	3	3	0.222193	3	5	4.25	0	0.120529	-0.701435
641	14	37	0	-99	-99	-99	-99	-99	-99	-99	-99	-99	-99	-99	-99	-99	-99	-99	-99	-99	-0.417068	-0.827876
642	14	37	0	3	3	1	4	3	4	2	2	2	2	3	2	0.6181	3.5	4.66667	2.25	2.33333	-0.417068	-1.5467
643	14	37	0	3	3	3	2	4	3	4	2	3	4	3	3.25	1.72008	4	4.33333	3.5	1.16667	1.1993	-0.44984
644	14	37	0	4	3	4	4	3	3	5	4	4	4	3.5	4.25	1.25023	4	5	3.75	17.17	0.120529	-0.974876
645	14	37	0	2	2	1	4	1	3	5	5	5	5	2.16667	5	-0.737186	1.5	5	4.5	5	1.1993	-0.302553
646	14	37	0	4	4	4	4	4	4	5	5	5	4	4	4.75	4.2829	4.5	5	4.75	-99	1.74037	0.57823
647	14	37	0	4	4	4	3	4	4	4	4	4	4	3.83333	4	-0.280966	3.75	5	4.5	5.16667	1.1993	-0.574481
648	14	37	0	2	4	2	4	1	2	2	1	2	3	2.5	2	0.229061	3.75	3.66667	3.25	1	-0.417068	-1.31575
649	14	37	0	3	3	3	3	3	3	4	2	3	3	3	3	-1.21149	3.25	4.66667	4.25	1.5	0.120529	-1.62699
650	14	37	0	4	2	1	4	3	3	3	2	2	2	2.83333	2.25	-2.56774	3.5	5	3.75	2.5	-0.953393	-2.75008
651	14	37	0	4	4	4	4	4	4	3	3	3	3	4	3	0.622189	4.25	4.33333	3.5	2	-0.417068	-0.932799
652	14	37	0	5	4	5	4	4	4	4	5	5	5	4.33333	4.75	2.67577	4.5	5	4.5	6.5	0.120529	-1.47691
653	13	37	0	4	4	2	4	5	3	3	4	5	3	3.66667	3.75	-1.30053	4	5	4.25	6.5	-99	-1.21599
654	14	37	0	4	3	3	3	3	-99	4	4	5	5	3.2	4.5	1.70698	3.5	5	4.5	1.33333	1.1993	-0.401631
655	15	37	0	4	4	2	3	5	-99	3	-99	3	3	3.6	3	0.525838	3.75	5	4	1	-99	-99
656	14	37	0	3	2	3	4	2	3	1	2	4	2	2.83333	2.25	1.64252	2.5	4.33333	3.25	1.5	-99	-99
657	14	38	0	3	4	5	2	4	5	4	2	3	5	3.83333	3.5	0.437405	3.25	4	2.75	0	1.1993	-0.323527
658	14	38	0	4	4	2	3	4	4	4	5	4	4	3.5	4.25	-1.18243	3.75	4.66667	4.5	-99	0.120529	0.223571
659	14	38	0	1	2	1	1	1	1	4	4	5	5	1.16667	4.5	1.04769	1.75	4	4.25	-99	0.120529	-0.290736
660	13	38	0	5	5	5	5	5	5	5	5	5	5	5	5	1.43432	5	5	3.5	17	2.36721	0.933645
661	14	38	0	3	3	4	3	4	4	4	3	3	3	3.5	3.25	-0.149121	3.5	4.66667	4.25	4	0.120529	0.467265
662	14	38	0	3	3	1	1	4	2	4	2	1	1	2.33333	2	1.4354	2	4	3	1	-0.953393	-1.04209
663	14	38	0	5	4	4	5	4	5	3	3	3	3	4.5	3	-0.641704	3.25	5	3.75	5.33333	1.74037	0.302861
664	14	38	0	4	3	2	5	4	4	4	4	4	3	3.66667	3.75	-0.45603	3.75	4.33333	3.5	7.16667	-0.417068	-0.464644
665	14	38	0	4	4	3	3	4	4	3	3	3	4	3.66667	3.25	1.27739	3.25	4.33333	4.25	5.5	-0.417068	0.775387
666	14	38	0	4	3	2	3	1	3	3	3	3	3	2.66667	3	0.195309	3.5	5	3.25	2.08333	1.1993	-0.0974949
667	14	38	0	3	2	2	4	4	5	4	5	5	5	3.33333	4.75	1.01129	4.25	4.66667	3.25	0.666667	0.120529	-0.193586
668	14	38	0	3	4	3	4	4	4	3	2	4	4	3.66667	3.25	-1.09851	3.75	5	4.5	3.5	-0.417068	-0.242982
669	15	38	0	4	5	5	4	4	5	5	5	5	5	4.5	5	0.602896	3.5	5	4.25	4.5	1.16293	-0.124223
670	14	38	0	4	2	4	4	2	4	3	5	3	4	3.33333	3.75	0.895959	4	5	4	5	-0.417068	-1.02044
671	14	38	0	4	3	2	4	2	3	5	4	3	4	3	4	0.289293	4	5	3.75	9	2.2825	0.275627
672	14	38	0	4	3	3	4	4	3	4	3	3	5	3.5	3.75	0.5364	4.75	5	4.25	3.33333	1.74037	0.352
673	14	38	0	2	4	1	3	4	4	3	2	3	3	3	2.75	-0.303695	4	4.66667	4.5	6.16667	0.120529	-0.848594
674	14	38	0	-99	-99	-99	-99	-99	-99	-99	-99	-99	-99	-99	-99	-99	-99	-99	-99	-99	0.120529	-0.492007
675	14	38	0	3	3	2	3	3	4	3	2	2	2	3	2.25	-0.877316	2.5	5	3.75	1	-0.417068	-2.02734
676	14	38	0	4	3	1	2	3	3	2	3	1	3	2.66667	2.25	0.592047	3.75	4.33333	2.25	6.25	-0.417068	-0.786639
677	14	38	0	4	4	2	3	4	5	5	5	4	5	3.66667	4.75	1.36815	4	5	4.25	3.25	-99	-99
678	15	38	0	3	3	2	3	3	4	2	1	1	1	3	1.25	-0.582436	1.75	4	2	2	-99	-99
679	14	38	0	4	4	3	4	4	4	4	4	4	4	3.83333	4	0.0118895	3.5	5	4	1.5	-99	-99
680	14	38	0	5	5	4	4	5	5	5	4	5	5	4.66667	4.75	-0.648292	4	5	4.5	12.67	-99	-99
681	14	39	0	5	5	4	4	5	4	5	5	5	5	4.5	5	0.583246	4	5	4	7.33333	0.659338	0.67711
682	14	39	0	3	4	2	3	5	4	4	3	2	4	3.5	3.25	0.378094	4	4.66667	3.75	2.5	0.659338	-0.222809
683	14	39	0	5	4	4	5	4	4	4	5	3	3	4.33333	3.75	0.534017	4	5	3.25	9.58333	0.659338	-0.181443
684	14	39	0	4	4	3	3	4	5	4	5	5	4	3.83333	4.5	0.490824	3.75	4.33333	4.5	7	0.659338	-1.23806
685	14	39	0	4	3	4	2	4	3	3	2	2	2	3.33333	2.25	0.760101	3.25	5	4	6.75	-0.417068	-1.23613
686	14	39	0	4	4	2	4	4	4	4	5	4	4	3.66667	4.25	-0.123258	3.33333	4.66667	3.75	1.70833	-0.417068	-1.72892
687	14	39	0	5	3	1	1	2	3	5	2	2	2	2.5	2.75	-0.581953	1.25	5	4	1.33333	1.74037	-0.619377
688	14	39	0	5	5	4	5	5	4	5	5	4	5	4.66667	4.75	1.27214	4	5	4.5	2.5	-0.417068	-0.229909
689	14	39	0	3	4	3	3	5	3	5	4	4	5	3.5	4.5	-0.506252	4.25	5	4.75	5.33333	1.1993	-99
690	13	39	0	4	5	4	4	5	4	5	5	5	5	4.33333	5	-0.980956	4.5	5	4	8.25	0.704185	-0.835234
691	14	39	0	4	2	1	2	5	4	2	2	2	2	3	2	0.342998	3.5	4.33333	3.75	6.25	0.659338	-0.272075
692	13	39	0	5	5	4	4	4	4	4	4	4	4	4.33333	4	-0.665711	4.75	5	5	8	1.25741	0.797036
693	15	39	0	3	3	4	4	4	4	4	5	4	4	3.66667	4.25	1.73454	4	5	4.75	5	1.16293	-0.0194198
694	14	39	0	3	3	2	2	5	3	5	5	5	5	3	5	2.75825	3.25	5	3.75	4.5	1.1993	-0.417434
695	14	39	0	4	3	2	-99	-99	4	3	-99	3	3	3.25	3	1.2505	-99	5	4	5.58333	0.659338	-0.896477
696	14	39	0	5	4	3	4	4	4	4	3	2	2	4	2.75	1.05385	3.75	5	4.5	4.33333	1.74037	-0.14432
697	14	39	0	5	3	5	3	5	5	5	3	5	5	4.33333	4.5	1.91386	3	5	3.5	8.83333	1.74037	-0.23071
698	14	39	0	3	4	4	4	4	5	2	4	3	5	4	3.5	-0.171511	4.25	5	4.25	7	1.1993	-0.194516
699	14	39	0	4	3	4	3	3	4	4	5	5	5	3.5	4.75	-0.0309085	3	4.66667	4.25	10.3333	1.74037	0.496814
700	14	39	0	5	3	4	4	4	4	3	1	3	4	4	2.75	-1.32269	4	4.66667	4	1	0.120529	-1.04781
701	14	40	0	3	4	3	2	3	3	3	2	2	2	3	2.25	-1.61168	3.25	5	3.5	0	0.120529	-0.0866073
702	14	40	0	3	4	4	3	5	3	5	5	5	5	3.66667	5	0.829538	4.25	5	4	4	0.120529	0.621326
703	15	40	0	1	2	1	1	3	3	1	1	1	1	1.83333	1	-0.36767	2.25	3	1.25	0.25	0.0977617	-0.739734
704	14	40	0	3	5	2	2	2	3	4	3	3	2	2.83333	3	-0.387643	3.75	5	3.5	0.416667	-99	-99
705	15	40	0	4	2	2	1	3	3	2	1	1	1	2.5	1.25	0.282349	2.5	4.33333	2.75	1.33333	0.0977617	-0.385392
706	14	40	0	5	3	5	3	5	5	5	4	4	5	4.33333	4.5	0.477847	5	4.66667	4	3.16667	1.74037	1.41938
707	14	40	0	3	2	1	1	2	2	4	2	3	2	1.83333	2.75	-0.880291	3.25	5	4	1.875	-0.417068	-0.482375
708	14	40	0	3	2	3	3	3	3	4	4	3	2	2.83333	3.25	0.485944	3.5	5	3.25	0	-0.417068	-0.23688
709	14	40	0	4	4	4	2	3	3	4	2	2	3	3.33333	2.75	2.06333	3	4.33333	4.5	5	0.659338	0.590848
710	13	40	0	3	2	2	2	2	2	5	3	3	2	2.16667	3.25	-1.66713	1.5	4	3.5	5	0.152147	-0.271689
711	15	40	0	3	3	1	3	2	2	3	1	1	1	2.33333	1.5	-0.686061	3.25	4.66667	3	2	-0.433055	-0.640093
712	14	40	0	3	4	2	1	4	4	4	4	4	4	3	4	-0.533646	2.75	4.33333	2.75	3.16667	0.659338	-0.589028
713	14	40	0	4	4	2	4	4	4	5	5	5	5	3.66667	5	0.142163	4.25	4.66667	4.25	3	1.74037	0.764045
714	14	40	0	4	3	5	4	4	3	4	4	4	4	3.83333	4	-1.22295	4.75	5	4.75	7.04167	1.1993	-0.182956
715	14	40	0	5	3	2	3	3	4	5	3	5	5	3.33333	4.5	-0.786089	3.75	4.33333	5	3	0.120529	-0.310652
716	14	40	0	5	5	3	2	4	4	5	4	4	4	3.83333	4.25	0.603486	5	5	4.5	4.16667	1.74037	0.727306
717	14	40	0	4	3	2	2	3	4	4	5	5	5	3	4.75	-1.91985	3	4.66667	4.5	2	0.120529	0.4259
718	15	40	0	2	3	-99	1	-99	2	2	2	2	2	2	2	-0.640851	2.66667	5	-99	-99	-0.433055	0.227508
719	14	40	0	3	3	1	1	5	1	1	1	1	1	2.33333	1	-2.0651	1.75	5	4.25	1.75	-2.02195	-1.23193
720	14	40	0	2	2	1	1	1	1	3	1	1	1	1.33333	1.5	-0.739339	2.75	3.66667	2.5	1.5	1.1993	0.258093
721	14	40	0	2	2	1	1	1	1	1	1	1	1	1.33333	1	-0.728752	2.25	5	3	1	-0.417068	-0.507809
722	15	41	0	3	2	2	4	3	3	4	5	3	4	2.83333	4	-0.976508	3.5	4.66667	2.5	2.91667	-0.433055	-0.367295
723	14	41	0	3	5	5	3	5	5	5	4	5	4	4.33333	4.5	-0.645586	4.75	5	4.5	2.16667	-0.417068	-0.904506
724	14	41	0	4	4	5	5	5	5	4	3	4	3	4.66667	3.5	-2.07753	4	5	4.5	2	-0.417068	-1.77327
725	13	41	0	5	4	3	5	5	5	3	4	4	4	4.5	3.75	0.379988	4.5	4.33333	3.75	6	0.152147	-1.34731
726	14	41	0	4	3	3	3	5	4	5	5	5	5	3.66667	5	0.694354	3.25	4.66667	4	3	0.120529	-0.12293
727	14	41	0	3	4	3	2	4	4	4	4	4	5	3.33333	4.25	-1.57726	4.25	4.66667	4	13.75	0.659338	-0.7982
728	14	41	0	4	3	2	1	3	4	4	4	3	5	2.83333	4	0.583408	4.25	5	4.66667	3.25	1.1993	-0.395114
729	14	41	0	2	2	2	2	3	3	1	1	1	1	2.33333	1	-0.307734	3	4	2	0	-0.417068	-1.8774
730	14	41	0	5	4	4	3	4	4	5	5	5	5	4	5	0.135115	3.75	5	5	-99	2.2825	0.0125991
731	14	41	0	3	4	3	2	4	3	4	5	5	5	3.16667	4.75	-0.276576	4.5	4.66667	4.25	4.5	2.2825	0.66908
732	13	41	0	5	5	3	5	3	5	5	5	5	5	4.33333	5	1.26139	4.75	5	4	10	0.152147	-0.325135
733	14	41	0	4	5	3	4	4	4	4	4	4	4	4	4	1.18505	4.5	5	4	4.5	1.74037	-0.37141
734	14	42	1	3	4	4	4	4	3	3	3	3	2	3.66667	2.75	0.855451	3.5	4.66667	4.25	2.5	1.19771	0.350328
735	14	42	1	5	3	3	3	3	5	4	5	5	5	3.66667	4.75	-0.856914	3.5	4.33333	4.25	7	1.9778	0.426177
736	14	42	1	5	5	4	4	5	5	5	4	5	4	4.66667	4.5	0.0480486	3.5	5	3.75	5.75	-99	-99
737	14	42	1	4	4	4	4	4	4	4	4	4	4	4	4	1.00444	4	5	4.75	5	-99	0.226553
738	14	42	1	3	2	3	3	4	3	4	4	4	4	3	4	-1.0344	3.25	3.66667	3	0	-0.751352	-1.57635
739	15	42	1	4	5	4	5	4	5	4	5	4	5	4.5	4.5	-0.793055	3.75	4.66667	4	3.33333	0.277821	-0.658592
740	14	42	1	5	5	3	5	4	5	3	4	4	4	4.5	3.75	-0.073384	4.25	5	3.5	3	0.807764	1.39231
741	14	42	1	3	2	5	2	3	5	2	3	2	2	3.33333	2.25	-0.688956	2.75	4.66667	3.75	6.33333	-0.751352	-2.31456
742	14	42	1	3	2	5	2	4	2	4	1	1	1	3	1.75	0.0774833	1.75	3.5	3	3	-0.751352	-2.19819
743	14	42	1	3	4	4	3	4	4	4	4	3	4	3.66667	3.75	1.64894	3.75	4	4	6.58333	0.807764	0.257737
744	14	42	1	5	5	5	5	5	5	4	2	3	3	5	3	0.0458688	4.5	5	4.75	17.5	0.807764	0.350633
745	14	42	1	4	5	1	3	3	4	3	3	1	5	3.33333	3	-0.478881	4.75	5	4.75	12	0.0280641	0.814917
746	15	42	1	5	3	3	4	3	5	3	3	3	3	3.83333	3	-1.67136	2.75	4	4	7.66667	0.652299	0.587885
747	14	42	1	3	4	2	3	4	4	4	4	3	3	3.33333	3.5	-0.501769	3	4	4	10.8333	0.41788	-1.26753
748	14	42	1	2	2	1	3	3	2	3	1	1	1	2.16667	1.5	-1.758	3.5	4	3	0	-1.14094	-2.97588
749	14	42	1	4	2	2	4	4	3	4	1	3	3	3.16667	2.75	-0.352453	2.5	4	3	5.5	0.41788	0.0253759
750	14	42	1	4	3	3	4	3	5	4	4	4	2	3.66667	3.5	0.0141818	2.25	4.66667	4	5.16667	-0.361681	-0.382833
751	14	42	1	3	4	3	2	4	5	1	1	2	2	3.5	1.5	1.75964	2.25	5	2.5	5.25	-0.751352	0.193815
752	15	42	1	4	4	3	4	3	4	4	3	3	3	3.66667	3.25	-1.86008	3.75	4.33333	4.75	0.875	0.277821	-1.01217
753	14	42	1	5	3	5	5	4	3	4	5	3	5	4.16667	4.25	-0.670022	2.75	5	4.25	1	-0.751352	-1.20134
754	14	42	1	4	3	1	5	2	3	3	2	3	4	3	3	-1.72505	2.5	4.66667	3.5	4.625	-0.751352	-1.72697
755	13	42	1	4	4	5	4	4	5	5	4	4	5	4.33333	4.5	-0.0324644	3	5	4.75	6	-99	-99
756	14	42	1	5	5	4	5	2	5	5	5	5	5	4.33333	5	0.312186	3.5	5	5	7.16667	0.807764	-0.604926
757	14	42	1	-99	-99	-99	-99	-99	-99	-99	-99	-99	-99	-99	-99	-99	-99	-99	-99	-99	0.41788	0.148683
758	13	43	1	4	1	1	1	1	1	4	4	4	4	1.5	4	-1.56828	3.75	4.33333	3	4.75	-0.192911	0.246525
759	14	43	1	4	4	3	3	4	4	3	5	5	4	3.66667	4.25	-1.10556	4.25	5	4	12.3333	-1.53046	-0.161484
760	14	43	1	5	-99	2	3	5	1	4	3	2	2	3.2	2.75	-0.113224	2.5	5	3.25	5.16667	0.0280641	0.205297
761	14	43	1	4	1	3	2	4	3	4	4	4	4	2.83333	4	0.676064	2.75	5	3.25	6	0.41788	1.35035
762	14	43	1	5	4	5	4	5	4	5	5	5	5	4.5	5	-1.05492	3.75	5	4	8.25	0.41788	0.593567
763	14	43	1	4	5	4	2	3	4	4	4	3	3	3.66667	3.5	0.871989	3	5	4.25	11	-0.361681	1.02199
764	14	43	1	4	5	4	4	4	4	4	4	4	4	4.16667	4	0.568103	4	4.66667	3.75	5	0.41788	0.897475
765	14	43	1	4	3	2	3	3	3	4	3	4	3	3	3.5	3.431	3.25	4	3.25	4.5	1.19771	0.548136
766	14	43	1	4	3	3	2	3	3	4	2	3	2	3	2.75	0.872231	3	4	3.75	4.5	0.807764	0.314561
767	14	43	1	5	5	5	5	4	4	5	5	5	5	4.66667	5	-0.709024	4	5	4.5	15.67	0.0280641	-0.165862
768	14	43	1	3	2	1	2	4	3	4	5	3	5	2.5	4.25	-0.825523	4	4.66667	4.5	16	0.807764	-0.685222
769	14	43	1	4	4	1	1	2	5	4	2	3	3	2.83333	3	-1.05007	2.75	5	3	10	0.0280641	-0.0388507
770	14	43	1	5	4	2	5	4	4	4	3	3	4	4	3.5	-0.551724	3.5	5	4	9.58333	0.0280641	-0.459355
771	15	43	1	-99	5	5	3	5	5	3	5	4	4	4.6	4	-0.249549	3.25	5	3.5	3	0.277821	-0.0766594
772	14	43	1	4	5	4	5	5	4	4	4	5	4	4.5	4.25	1.94466	3.75	5	4.75	18.33	1.58772	0.488592
773	14	43	1	5	4	3	4	5	4	4	3	3	3	4.16667	3.25	1.25971	3.75	5	3.5	4.5	0.0280641	-0.284117
774	14	43	1	5	4	4	3	5	5	5	5	5	5	4.33333	5	1.31293	3.25	5	4.5	7.5	1.58772	0.830986
775	15	43	1	4	5	4	3	5	4	4	4	4	4	4.16667	4	-0.978469	4.33333	5	5	5.5	0.277821	0.210243
776	15	43	1	4	5	5	5	5	5	5	5	5	5	4.83333	5	1.20844	3.75	5	4.75	12.3333	2.15081	0.766786
777	15	44	1	4	4	3	3	5	3	2	2	2	3	3.66667	2.25	0.0646375	2.75	4.33333	2.75	-99	-0.845211	-0.767791
778	14	44	1	2	5	5	5	4	2	3	2	1	1	3.83333	1.75	0.149143	2.25	5	3.75	4.5	-0.751352	-1.83595
779	14	44	1	-99	-99	-99	-99	-99	-99	-99	-99	-99	-99	-99	-99	-99	-99	-99	-99	-99	0.0280641	-1.00347
780	14	44	1	4	3	2	5	5	4	4	5	4	2	3.83333	3.75	-0.565598	3.25	4.66667	4.5	4.375	0.0280641	0.235619
781	14	44	1	5	4	3	4	3	4	4	4	4	4	3.83333	4	-0.244762	3.5	5	4	6	-0.361681	-0.72998
782	15	44	1	5	4	5	4	4	5	4	5	5	5	4.5	4.75	-0.923307	4.5	4.66667	4.75	7.5	0.652299	-0.0991474
783	14	44	1	4	3	2	4	5	3	2	2	1	4	3.5	2.25	2.39969	3	3.66667	4.25	3	0.807764	0.324899
784	14	45	1	3	2	1	2	2	2	3	2	2	3	2	2.5	0.321205	3.75	3.66667	3.25	1	0.41788	-1.34813
785	14	45	1	5	4	4	5	5	5	5	5	4	4	4.66667	4.5	0.43226	3.25	5	3.5	6	0.41788	-1.16662
786	15	45	1	5	4	3	3	4	4	5	5	5	5	3.83333	5	1.2226	2.75	5	4.25	6.5	1.7761	0.252443
787	14	45	1	4	4	3	4	3	4	5	5	5	5	3.66667	5	0.475049	4	5	4	7	1.58772	-0.728767
788	14	45	1	3	2	3	2	3	3	1	2	1	1	2.66667	1.25	-1.5743	1	3.66667	2.75	1.33333	-0.361681	-1.20383
789	15	45	1	4	4	2	4	5	4	3	1	2	3	3.83333	2.25	0.261853	2.75	5	3.75	1	-0.470937	-2.52818
790	15	45	1	4	3	2	1	3	5	4	3	3	4	3	3.5	0.0402129	3.25	5	4	0	-0.0965922	-0.14287
791	14	45	1	3	2	1	4	2	2	2	1	2	1	2.33333	1.5	-0.32517	3	3.66667	2	0	-0.751352	-1.85081
792	14	45	1	5	5	2	3	3	3	4	4	5	4	3.5	4.25	-0.813997	3.75	5	4.75	6	1.19771	0.670769
793	15	45	1	5	5	2	2	4	4	4	4	4	3	3.66667	3.75	2.60704	3.75	5	4.25	9.5	1.02684	-0.778767
794	14	45	1	4	4	3	2	3	3	3	2	2	2	3.16667	2.25	0.258297	4	4.33333	4.25	6.25	0.41788	-1.03449
795	14	45	1	-99	-99	-99	-99	-99	-99	-99	-99	-99	-99	-99	-99	-99	-99	-99	-99	-99	1.19771	-0.476028
796	14	45	1	5	5	5	4	4	4	5	5	4	5	4.5	4.75	0.412122	3.25	5	4	3.5	0.807764	0.201967
797	15	45	1	4	4	4	4	4	4	4	3	4	4	4	3.75	-0.522299	3	4.66667	4.5	7	-0.0965922	-0.689889
798	14	45	1	4	3	2	2	3	4	3	2	2	2	3	2.25	-0.27107	3.25	4	3	0	-0.751352	-1.56789
799	14	45	1	5	4	5	5	5	4	3	5	4	4	4.66667	4	1.14674	4.75	4	3.75	7	0.807764	0.633789
800	14	45	1	4	2	2	4	2	3	3	2	2	3	2.83333	2.5	0.181942	3.25	5	3.25	0	-0.361681	-0.742809
801	15	45	1	4	1	2	5	5	5	3	3	3	3	3.66667	3	-2.59456	1.75	5	4.25	0	-0.845211	-1.7524
802	14	46	1	3	3	2	4	4	3	4	4	4	3	3.16667	3.75	1.7875	2.5	4.66667	3.25	11.25	-0.751352	-0.892155
803	14	46	1	3	4	2	4	4	5	4	3	3	3	3.66667	3.25	0.474962	3.5	4.66667	4	7	0.41788	0.106651
804	14	46	1	4	4	2	2	4	4	4	3	3	3	3.33333	3.25	-0.369714	2.75	4.66667	3.75	5.91667	1.19771	-1.54684
805	14	46	1	4	3	3	2	3	4	4	4	4	4	3.16667	4	-0.449534	3.5	4.66667	4.25	3	0.807764	-0.742879
806	14	46	1	5	3	2	2	3	5	4	4	4	4	3.33333	4	0.521972	4.5	4.66667	3.5	4.25	1.58772	-0.317927
807	14	46	1	5	5	3	4	4	4	5	5	5	5	4.16667	5	1.43384	3.5	4.66667	4	-99	0.0280641	-1.74788
808	14	46	1	3	2	2	3	2	2	1	1	1	1	2.33333	1	-1.88347	-99	3.66667	2	-99	-0.751352	-1.72312
809	14	46	1	3	3	3	4	3	4	4	4	4	4	3.33333	4	0.825018	2.75	4.33333	4	3	1.19771	-1.75852
810	14	46	1	4	3	3	4	3	4	4	5	4	4	3.5	4.25	0.907607	2.75	4.66667	4.25	6.25	1.19771	-0.789594
811	14	46	1	5	4	3	3	5	5	4	5	4	4	4.16667	4.25	-0.129799	4	5	4	7.5	1.19771	0.10062
812	15	46	1	4	3	3	5	4	5	5	5	5	5	4	5	0.207998	4.25	5	4.5	8	0.652299	-0.779787
813	15	46	1	5	4	3	2	4	5	4	5	5	5	3.83333	4.75	-0.52627	3.25	5	3.25	6.5	0.652299	-0.468894
814	15	46	1	5	5	1	4	5	3	3	2	3	3	3.83333	2.75	-3.08427	3.25	5	3.5	0	-0.0965922	-2.25045
815	14	46	1	4	3	4	3	2	3	4	3	4	3	3.16667	3.5	-0.732486	3.25	4.66667	4.75	5	-99	-99
816	16	46	1	3	3	2	4	3	3	3	3	3	3	3	3	-0.40837	3.25	3.66667	3.75	12.25	-99	-99
817	14	46	1	3	3	2	3	2	4	5	4	4	4	2.83333	4.25	0.0399497	3.25	4.66667	4.75	2.25	-99	-99
818	14	46	1	4	4	1	1	3	5	4	1	1	4	3	2.5	-1.34319	2	5	3.75	6	-99	-99
819	15	46	1	5	5	3	3	4	5	5	5	5	5	4.16667	5	-0.557121	2.75	4.66667	4	5.5	-99	-99
820	14	47	1	4	3	2	2	3	4	3	1	2	3	3	2.25	1.86665	2.5	4.33333	2.75	1.66667	-0.361681	-0.0887362
821	14	47	1	3	4	5	3	4	5	4	4	4	4	4	4	-0.882368	3.75	4.33333	3.5	3	0.0280641	-0.276873
822	14	47	1	4	3	2	3	3	4	4	4	4	4	3.16667	4	4.14789	2.75	4.33333	3.5	12.67	0.0280641	1.08319
823	14	47	1	4	4	3	4	5	4	4	4	4	4	4	4	2.3338	3.25	5	3.75	4.16667	0.41788	0.127632
824	13	47	1	4	5	3	3	4	4	5	5	4	3	3.83333	4.25	0.246593	3	3.66667	3.5	6	-0.192911	-0.135477
825	14	47	1	5	5	2	5	5	5	4	4	4	4	4.5	4	-0.776781	3.25	5	4.5	12	-0.751352	-1.61558
826	15	47	1	5	4	4	4	4	4	4	3	4	3	4.16667	3.5	0.657052	3.75	5	4	4	-0.470937	-0.519062
827	14	47	1	4	4	3	4	4	5	5	4	5	4	4	4.5	-3.13737	3	4.33333	4.25	18.33	0.807764	-0.437465
828	14	47	1	2	4	-99	1	4	3	3	2	3	2	2.8	2.5	-0.353849	3.25	5	3	0	0.0280641	-0.11379
829	14	47	1	5	5	5	5	5	5	5	5	5	5	5	5	0.52276	5	5	5	9.08333	-1.14094	-1.40458
830	14	47	1	3	2	3	3	2	4	4	4	4	4	2.83333	4	-3.16983	2.5	4.33333	5	9	0.41788	-0.333698
831	15	47	1	3	4	2	3	3	4	3	2	2	2	3.16667	2.25	1.28586	2.5	4.33333	3.75	-99	0.277821	0.023194
832	15	47	1	4	4	4	3	4	4	5	2	2	4	3.83333	3.25	-2.39229	4	4.66667	4	4	-0.0965922	-2.00317
833	14	47	1	3	3	2	2	4	3	3	1	2	2	2.83333	2	1.96288	2.25	4.66667	3	4	0.41788	-0.423957
834	14	47	1	4	4	3	3	2	3	4	2	4	3	3.16667	3.25	-1.83881	2.5	4.66667	3	8.5	-0.751352	-0.11975
835	14	47	1	4	4	2	3	4	4	3	2	3	2	3.5	2.5	0.334773	3.25	4.66667	3.5	0	-1.14094	-2.56949
836	14	47	1	5	4	5	4	4	5	4	3	3	3	4.5	3.25	2.86141	3.25	5	3.5	11	0.41788	-0.567946
837	14	47	1	4	3	2	4	4	4	3	2	2	3	3.5	2.5	-0.777851	3	4	2.75	4.33333	-0.751352	-1.74131
838	14	47	1	4	3	3	4	3	4	3	3	3	4	3.5	3.25	-2.97942	2.75	4.66667	3.25	1.66667	-0.751352	-1.37975
839	14	48	1	3	4	3	2	4	4	2	1	3	2	3.33333	2	-1.89179	2.75	4.33333	3.5	3	0.0280641	-1.17568
840	15	48	1	4	5	3	5	5	4	4	3	4	4	4.33333	3.75	-1.24327	4	5	4.25	8.5	0.652299	0.219463
841	15	48	1	4	4	4	3	4	4	4	5	4	4	3.83333	4.25	2.37265	3.75	5	4.25	-99	1.7761	-0.438205
842	15	48	1	5	5	5	4	5	4	3	5	4	4	4.66667	4	0.0951676	3.5	5	4.25	15.25	1.7761	0.239302
843	14	48	1	5	5	3	3	5	5	5	5	5	5	4.33333	5	0.850349	4.25	5	5	4.66667	-0.361681	0.0717859
844	15	48	1	3	3	2	3	2	3	4	3	4	4	2.66667	3.75	-0.121824	3	5	4.5	1.75	-0.0965922	-0.328343
845	14	48	1	4	4	2	4	4	4	4	3	4	5	3.66667	4	0.972764	3.25	4	3.25	7	0.41788	0.0181322
846	14	48	1	4	2	2	3	2	3	3	2	3	2	2.66667	2.5	1.03447	2.75	5	4.75	4.5	1.58772	-0.0344728
847	14	48	1	3	3	2	2	2	4	4	2	2	3	2.66667	2.75	-0.199093	2.25	4.33333	4	4.75	1.58772	-0.00436101
848	14	48	1	4	4	3	4	4	3	3	3	4	5	3.66667	3.75	0.158716	3.25	5	3.5	4	0.0280641	0.0997118
849	14	48	1	4	4	3	4	3	4	4	3	3	4	3.66667	3.5	-1.73715	3	4	4.25	5	0.41788	-0.0140954
850	14	48	1	3	2	1	3	2	3	4	4	4	5	2.33333	4.25	1.01411	3.75	4.5	4.25	-99	0.807764	0.28755
851	14	48	1	5	4	5	4	4	5	5	5	5	5	4.5	5	0.651663	3.25	5	4.5	5.25	0.41788	-1.10633
852	14	48	1	-99	-99	-99	-99	-99	-99	-99	-99	-99	-99	-99	-99	-99	-99	-99	-99	-99	1.19771	-0.55912
853	15	48	1	3	3	2	4	3	4	5	5	5	5	3.16667	5	0.540392	3.5	5	4.5	5.875	1.40144	0.438221
854	14	48	1	4	4	3	4	3	4	4	1	3	3	3.66667	2.75	-0.461731	3.5	4.66667	3.75	6	0.0280641	-0.729072
855	14	48	1	5	4	3	5	4	4	5	4	5	4	4.16667	4.5	-1.05256	4.25	4.66667	4.75	18.33	-99	-99
856	14	48	1	5	4	3	4	4	3	4	4	3	2	3.83333	3.25	1.27353	2.5	4	3.5	16.3333	1.58772	0.605494
857	14	48	1	4	3	1	3	2	3	3	2	3	2	2.66667	2.5	1.37783	2.75	4.66667	3.75	5.58333	0.41788	-0.0194519
858	14	48	1	4	4	5	5	3	2	4	4	4	2	3.83333	3.5	-0.833738	3	5	4.75	8.33333	1.9778	1.09006
859	15	48	1	5	4	3	4	5	5	4	3	4	4	4.33333	3.75	-1.89458	3.75	5	4	10.5	1.40144	0.921696
860	15	48	1	3	4	2	5	3	4	3	5	4	5	3.5	4.25	0.176611	2.5	5	3.25	11.5	1.02684	-0.299517
