# Supplementary material for: Physical Activity-Related Health Competence, Physical Activity, and Physical Fitness: Analysis of Control Competence for the Self-Directed Exercise of Adolescents
Source: Int J Environ Res Public Health. 2019 Dec 19;17(1):39. doi: 10.3390/ijerph17010039 (PMC6981936; doi:10.3390/ijerph17010039)
Supplement: Supplementary file 1 [file ijerph-17-00039-s001.zip › Supplementary Material_PAHCO/Supplemetary Material_File S3.xlsx]

## Sheet: Supplemetary Material_File S3
Laufnr	gender	school	Alter	SKT1	SKT2	SKT3	SKT4	SKT5	SKT6	BR1	BR2	BR3	BR4	SKT	BR
1	2	14	14	5	5	4	5	5	4	5	4	4	4	4.66667	4.25
2	2	14	14	5	5	5	5	5	5	5	5	5	5	5	5
3	1	14	14	5	4	4	3	3	4	4	4	4	5	3.83333	4.25
4	1	14	14	5	4	4	4	4	5	4	4	4	5	4.33333	4.25
5	2	14	14	4	4	3	4	4	5	4	5	5	5	4	4.75
6	2	14	14	4	5	5	5	4	5	4	4	5	5	4.66667	4.5
7	2	14	15	4	4	3	3	5	5	3	5	3	4	4	3.75
8	2	14	14	4	4	2	3	3	4	4	4	3	4	3.33333	3.75
9	1	14	15	3	5	4	3	4	3	5	5	5	5	3.66667	5
10	1	14	14	4	4	4	3	4	3	4	5	5	5	3.66667	4.75
11	1	14	14	3	4	3	4	2	3	4	3	3	3	3.16667	3.25
12	1	14	14	4	5	1	2	5	5	4	3	3	3	3.66667	3.25
13	2	14	14	5	4	2	1	5	3	5	5	2	5	3.33333	4.25
14	2	14	15	5	5	5	4	4	5	5	5	5	5	4.66667	5
15	2	14	14	4	4	2	5	4	3	3	3	2	1	3.66667	2.25
16	2	14	14	4	5	3	5	5	5	5	5	5	5	4.5	5
17	2	14	14	5	5	5	4	5	4	4	4	4	5	4.66667	4.25
18	2	14	14	5	4	2	3	4	4	4	4	4	3	3.66667	3.75
19	2	14	14	4	4	4	4	4	4	3	2	2	4	4	2.75
20	2	14	14	4	4	2	4	3	4	3	4	2	3	3.5	3
21	2	14	15	4	5	5	4	5	5	3	3	3	5	4.66667	3.5
22	2	14	14	5	5	3	5	5	5	5	5	5	5	4.66667	5
23	2	3	14	3	4	3	3	4	4	4	4	4	4	3.5	4
24	2	3	13	3	3	2	4	3	2	3	2	2	3	2.83333	2.5
25	2	3	14	3	3	2	4	4	3	4	4	3	4	3.16667	3.75
26	2	3	14	3	2	2	2	2	3	2	1	2	2	2.33333	1.75
27	2	3	14	3	2	1	2	1	3	2	1	1	2	2	1.5
28	2	3	14	5	5	5	4	5	5	4	3	4	4	4.83333	3.75
29	2	3	14	4	4	4	4	4	4	4	4	4	4	4	4
30	2	3	14	5	5	5	4	5	5	3	3	4	4	4.83333	3.5
31	2	3	15	1	1	1	1	1	1	1	1	1	1	1	1
32	2	3	15	5	5	4	4	1	-99	5	3	4	4	3.8	4
33	2	3	14	3	3	2	4	3	4	4	2	3	3	3.16667	3
34	2	3	13	3	3	4	2	3	4	1	5	3	3	3.16667	3
35	2	3	14	3	2	1	2	2	2	4	2	1	3	2	2.5
36	2	3	14	3	3	2	3	3	3	4	4	3	4	2.83333	3.75
37	2	3	14	5	3	4	4	5	4	1	1	1	1	4.16667	1
38	2	3	14	4	3	4	3	4	3	3	3	2	2	3.5	2.5
39	2	3	14	4	3	5	2	5	4	4	3	4	5	3.83333	4
40	2	3	14	5	4	3	3	5	5	3	4	4	4	4.16667	3.75
41	2	3	14	4	5	4	4	4	5	5	5	5	5	4.33333	5
42	2	3	14	4	4	2	3	3	3	2	3	3	3	3.16667	2.75
43	2	3	14	5	4	3	4	5	4	4	5	5	5	4.16667	4.75
44	2	3	14	4	2	2	2	2	2	2	4	4	3	2.33333	3.25
45	1	3	14	3	5	3	2	3	4	4	5	4	5	3.33333	4.5
46	1	3	14	2	2	3	1	4	3	3	5	5	4	2.5	4.25
47	1	3	16	5	4	3	5	4	3	1	1	1	4	4	1.75
48	1	3	14	3	5	4	3	4	3	4	2	2	2	3.66667	2.5
49	1	3	14	5	5	3	2	3	5	5	5	4	1	3.83333	3.75
50	1	3	14	5	5	4	5	5	3	3	5	5	5	4.5	4.5
51	1	3	14	5	4	3	5	4	5	4	4	4	3	4.33333	3.75
52	1	3	14	2	4	5	4	5	4	1	2	1	1	4	1.25
53	1	3	14	4	3	4	3	2	4	4	3	3	4	3.33333	3.5
54	1	3	15	2	3	2	2	3	4	3	2	2	2	2.66667	2.25
55	1	3	14	5	3	3	4	3	3	5	5	5	5	3.5	5
56	1	3	14	4	3	2	4	2	4	4	3	3	4	3.16667	3.5
57	1	3	14	4	4	2	1	4	3	3	4	4	3	3	3.5
58	1	3	14	4	-99	3	4	4	5	4	1	4	4	4	3.25
59	1	3	14	5	4	2	5	5	5	2	2	2	4	4.33333	2.5
60	1	3	14	4	4	5	4	4	5	3	5	1	2	4.33333	2.75
61	1	3	14	4	4	3	2	4	4	5	5	5	5	3.5	5
62	1	3	14	4	3	5	5	5	4	4	2	3	2	4.33333	2.75
63	1	3	15	4	4	2	2	2	1	3	5	3	4	2.5	3.75
64	1	3	14	2	2	1	2	1	3	3	4	4	4	1.83333	3.75
65	1	3	14	4	4	2	2	1	3	5	4	4	4	2.66667	4.25
66	1	3	14	1	4	5	2	5	1	5	5	5	4	3	4.75
67	1	3	15	4	4	3	3	3	3	3	3	3	2	3.33333	2.75
68	1	3	14	4	3	2	2	2	4	4	3	3	4	2.83333	3.5
69	1	3	14	4	3	2	2	3	4	3	4	4	4	3	3.75
70	1	3	15	4	3	2	2	2	3	4	5	5	4	2.66667	4.5
71	1	5	15	4	3	2	4	4	4	4	4	3	3	3.5	3.5
72	1	5	15	3	4	4	3	4	4	4	3	3	4	3.66667	3.5
73	1	5	14	4	4	3	4	5	4	5	3	4	4	4	4
74	2	5	14	4	3	3	2	4	4	3	3	3	3	3.33333	3
75	2	5	15	4	5	5	2	1	4	3	1	1	4	3.5	2.25
76	1	5	15	4	4	2	2	4	4	3	3	2	3	3.33333	2.75
77	1	5	14	4	3	2	2	3	4	3	2	3	3	3	2.75
78	1	5	14	5	5	5	5	5	5	5	5	5	5	5	5
79	1	5	14	1	3	1	1	3	2	3	2	2	1	1.83333	2
80	2	5	15	5	4	5	5	4	4	3	4	2	2	4.5	2.75
81	2	5	15	3	3	1	2	4	4	3	3	2	3	2.83333	2.75
82	2	5	15	3	4	3	4	3	4	4	2	2	3	3.5	2.75
83	2	5	15	5	5	4	5	3	4	5	5	5	5	4.33333	5
84	2	5	14	5	4	3	3	5	5	4	4	5	4	4.16667	4.25
85	1	5	15	1	1	1	1	1	3	1	2	1	1	1.33333	1.25
86	1	5	15	4	3	2	2	5	4	3	5	4	5	3.33333	4.25
87	1	5	15	4	3	2	3	3	5	3	2	4	3	3.33333	3
88	1	5	15	3	4	1	1	4	3	3	4	1	3	2.66667	2.75
89	2	5	15	4	3	4	5	3	5	4	3	4	3	4	3.5
90	2	5	14	4	4	4	3	5	4	4	5	4	5	4	4.5
91	1	5	14	4	5	3	4	4	5	5	5	5	5	4.16667	5
92	2	5	15	3	3	2	4	2	4	2	3	2	3	3	2.5
93	2	5	14	3	3	4	4	2	4	4	3	3	3	3.33333	3.25
94	2	5	15	5	4	3	3	3	3	5	1	4	4	3.5	3.5
95	1	5	15	3	4	3	3	3	3	4	4	3	4	3.16667	3.75
96	2	5	14	4	4	5	4	4	4	4	5	4	4	4.16667	4.25
97	2	5	15	4	4	3	3	4	4	4	4	4	4	3.66667	4
98	2	21	14	4	4	3	3	4	5	4	4	3	3	3.83333	3.5
99	1	21	14	3	4	3	4	3	4	4	2	2	3	3.5	2.75
100	1	21	15	3	3	3	3	3	4	2	2	2	2	3.16667	2
101	1	21	14	4	5	3	3	3	3	4	1	2	3	3.5	2.5
102	2	21	15	4	3	3	3	2	4	2	4	3	4	3.16667	3.25
103	2	21	15	4	4	3	3	4	4	4	3	3	3	3.66667	3.25
104	2	21	14	4	4	2	4	3	5	3	4	4	4	3.66667	3.75
105	2	21	14	2	3	1	1	1	3	1	2	1	2	1.83333	1.5
106	2	21	14	3	4	2	5	3	4	2	4	4	4	3.5	3.5
107	2	21	14	4	4	4	4	4	5	5	3	4	4	4.16667	4
108	2	21	14	4	4	1	1	4	2	2	4	3	2	2.66667	2.75
109	2	21	14	4	4	2	4	4	3	3	4	4	4	3.5	3.75
110	2	21	15	4	5	4	4	5	4	4	4	3	4	4.33333	3.75
111	2	21	14	5	5	3	2	4	4	3	2	3	3	3.83333	2.75
112	2	21	15	4	4	2	5	4	4	3	3	3	4	3.83333	3.25
113	2	21	15	4	4	3	2	2	2	4	3	3	3	2.83333	3.25
114	2	21	14	3	4	2	3	4	2	3	4	5	5	3	4.25
115	1	21	15	4	4	2	3	3	4	5	2	2	2	3.33333	2.75
116	1	21	15	4	4	2	4	5	3	5	3	2	3	3.66667	3.25
117	1	21	14	4	4	3	4	4	4	3	4	3	4	3.83333	3.5
118	1	21	14	4	4	2	1	3	3	3	3	3	3	2.83333	3
119	1	21	14	5	2	5	4	5	5	5	5	5	5	4.33333	5
120	2	21	16	4	4	4	4	4	3	4	4	5	4	3.83333	4.25
121	2	21	15	5	4	4	5	5	5	5	5	5	5	4.66667	5
122	1	21	14	1	1	1	1	1	1	1	2	2	1	1	1.5
123	1	21	14	5	4	5	4	2	5	4	5	5	5	4.16667	4.75
124	1	21	14	5	4	3	4	3	3	3	3	3	3	3.66667	3
125	1	21	15	4	3	2	2	3	3	4	3	4	3	2.83333	3.5
126	1	21	14	4	4	3	5	5	4	5	3	3	5	4.16667	4
127	1	21	14	4	3	3	3	4	4	4	4	4	5	3.5	4.25
128	2	21	15	4	3	4	4	4	3	2	3	2	1	3.66667	2
129	2	21	15	2	2	3	2	3	2	1	1	1	1	2.33333	1
130	2	21	14	3	3	3	3	2	4	4	4	4	4	3	4
131	1	21	15	3	4	3	2	4	4	5	4	5	4	3.33333	4.5
132	1	21	14	5	3	1	4	3	5	5	5	5	5	3.5	5
133	2	21	14	4	4	3	4	4	4	4	3	3	3	3.83333	3.25
134	2	21	15	4	3	2	3	4	5	4	5	5	4	3.5	4.5
135	2	21	15	3	2	4	1	2	2	3	3	3	1	2.33333	2.5
136	2	21	14	4	4	2	4	1	5	5	4	4	5	3.33333	4.5
137	2	21	14	4	5	4	2	5	4	4	3	4	5	4	4
138	2	21	14	5	4	4	3	2	3	5	3	4	4	3.5	4
139	2	21	14	4	4	4	4	4	4	3	2	5	3	4	3.25
140	2	21	14	4	4	3	4	4	3	3	3	3	4	3.66667	3.25
141	2	21	15	4	5	1	1	4	4	2	1	2	3	3.16667	2
142	2	21	14	4	4	2	2	2	4	3	4	3	3	3	3.25
143	2	21	14	2	4	3	4	4	3	3	4	4	3	3.33333	3.5
144	2	21	15	3	4	1	2	4	3	3	2	3	4	2.83333	3
145	2	21	15	4	5	4	5	4	3	5	5	5	4	4.16667	4.75
146	2	21	13	4	4	2	3	4	3	2	3	3	2	3.33333	2.5
147	2	21	14	5	3	1	4	5	4	5	5	4	5	3.66667	4.75
148	1	21	15	5	5	4	3	5	5	5	5	5	5	4.5	5
149	1	21	16	4	5	3	2	4	5	3	3	3	4	3.83333	3.25
150	1	21	15	5	4	3	3	4	5	4	2	4	4	4	3.5
151	2	21	14	4	5	3	2	3	3	4	4	4	3	3.33333	3.75
152	1	21	14	5	5	4	5	5	5	4	3	2	2	4.83333	2.75
153	1	21	14	4	4	4	4	4	3	4	2	3	3	3.83333	3
154	1	21	14	3	1	1	1	4	3	1	1	1	1	2.16667	1
155	1	21	14	3	4	3	3	4	3	2	2	2	4	3.33333	2.5
156	1	21	15	5	5	4	3	5	4	5	5	5	5	4.33333	5
157	1	21	15	4	4	5	2	5	5	5	4	4	4	4.16667	4.25
158	1	21	14	3	4	4	3	3	4	4	4	4	4	3.5	4
159	1	21	14	3	2	2	2	3	3	3	3	3	1	2.5	2.5
160	2	21	15	3	5	3	4	4	3	3	2	3	3	3.66667	2.75
161	2	21	14	5	4	4	4	4	4	4	5	5	5	4.16667	4.75
162	2	21	15	3	4	4	3	3	4	4	2	2	3	3.5	2.75
163	2	21	14	4	4	4	3	4	5	4	4	4	4	4	4
164	2	21	14	5	4	3	3	4	4	3	4	4	3	3.83333	3.5
165	2	7	14	2	3	1	2	1	2	1	1	1	1	1.83333	1
166	2	7	14	5	3	2	2	3	3	5	1	5	5	3	4
167	2	7	14	3	3	2	4	5	4	2	3	3	3	3.5	2.75
168	1	7	14	3	3	2	3	5	4	3	5	4	5	3.33333	4.25
169	1	7	14	3	4	4	3	5	4	4	4	4	5	3.83333	4.25
170	1	7	14	4	4	5	5	1	1	5	5	3	3	3.33333	4
171	1	7	15	4	4	3	3	3	4	5	5	3	2	3.5	3.75
172	1	7	14	4	3	2	3	5	3	5	5	5	5	3.33333	5
173	1	7	14	3	4	3	3	2	4	4	4	4	4	3.16667	4
174	1	7	15	4	4	1	3	2	4	2	3	3	3	3	2.75
175	1	7	14	4	4	4	3	3	4	4	4	3	4	3.66667	3.75
176	1	7	14	5	5	4	5	4	4	4	3	4	5	4.5	4
177	1	7	14	4	5	4	3	4	4	5	1	1	3	4	2.5
178	1	7	14	4	4	4	3	5	4	3	2	5	3	4	3.25
179	2	7	14	4	3	1	1	2	1	2	2	3	3	2	2.5
180	2	7	15	5	3	2	2	5	3	1	5	4	5	3.33333	3.75
181	2	7	14	5	5	1	5	5	5	1	2	2	1	4.33333	1.5
182	2	7	14	4	3	3	3	4	3	5	5	5	4	3.33333	4.75
183	2	7	14	4	4	3	3	3	3	4	5	3	3	3.33333	3.75
184	2	7	14	4	5	2	2	4	4	4	5	5	5	3.5	4.75
185	1	22	14	2	2	1	1	-99	2	1	1	4	2	1.6	2
186	2	22	15	3	4	4	3	3	4	4	2	1	1	3.5	2
187	1	22	14	4	4	3	4	4	4	3	3	3	3	3.83333	3
188	1	22	14	4	4	2	4	2	3	5	5	5	4	3.16667	4.75
189	2	22	15	4	3	1	5	1	1	3	4	2	5	2.5	3.5
190	2	22	14	4	4	3	4	1	3	2	1	5	5	3.16667	3.25
191	2	22	14	4	4	3	3	2	3	4	-99	5	5	3.16667	4.66667
192	2	22	15	3	3	2	3	3	4	3	4	3	3	3	3.25
193	2	22	15	4	5	3	2	4	4	3	3	3	4	3.66667	3.25
194	1	22	14	4	3	4	5	3	4	4	5	5	5	3.83333	4.75
195	1	22	14	4	4	4	3	4	4	4	3	4	4	3.83333	3.75
196	1	22	16	4	4	3	3	4	4	4	5	4	4	3.66667	4.25
197	1	22	14	4	4	2	5	4	4	4	5	5	5	3.83333	4.75
198	1	22	14	2	4	1	2	1	3	1	2	3	3	2.16667	2.25
199	1	22	14	4	4	3	3	3	4	5	5	5	5	3.5	5
200	1	22	15	3	3	2	3	1	3	2	2	2	2	2.5	2
201	1	22	14	3	4	3	4	4	4	4	4	2	2	3.66667	3
202	1	22	14	3	3	5	2	2	3	4	5	5	5	3	4.75
203	1	22	14	4	4	2	1	3	3	2	2	2	3	2.83333	2.25
204	1	22	14	3	4	1	1	2	3	1	4	1	1	2.33333	1.75
205	2	22	15	4	4	3	3	3	2	4	4	3	4	3.16667	3.75
206	2	22	14	4	4	4	2	2	4	3	2	3	3	3.33333	2.75
207	1	22	14	3	3	3	3	4	4	4	5	5	5	3.33333	4.75
208	2	22	14	5	2	5	1	5	5	5	1	1	1	3.83333	2
209	2	22	14	4	4	3	3	4	3	4	3	4	3	3.5	3.5
210	2	22	14	3	3	3	3	3	3	3	3	3	3	3	3
211	2	22	14	5	2	1	5	4	4	1	1	1	1	3.5	1
212	2	7	14	3	3	4	4	3	3	4	3	3	1	3.33333	2.75
213	2	7	14	4	5	4	4	3	5	4	5	5	4	4.16667	4.5
214	2	7	14	5	5	4	4	5	5	5	4	4	5	4.66667	4.5
215	2	7	14	3	5	3	2	3	4	4	4	2	3	3.33333	3.25
216	1	7	14	5	4	1	3	1	1	1	3	1	4	2.5	2.25
217	1	7	14	2	2	1	2	4	3	4	1	1	1	2.33333	1.75
218	1	7	15	5	5	5	5	5	5	5	5	5	5	5	5
219	1	7	14	3	5	2	3	4	4	5	5	4	5	3.5	4.75
220	1	7	14	4	4	3	4	5	3	2	3	3	4	3.83333	3
221	1	7	15	4	3	4	4	3	4	4	4	5	3	3.66667	4
222	1	7	14	4	5	3	4	3	5	5	4	4	5	4	4.5
223	1	7	14	2	2	2	1	2	2	2	2	2	2	1.83333	2
224	1	7	14	4	5	4	3	5	4	4	5	4	4	4.16667	4.25
225	1	7	14	4	3	2	2	2	3	5	5	5	5	2.66667	5
226	1	7	14	3	2	1	1	3	3	3	4	3	2	2.16667	3
227	1	7	14	4	3	4	2	5	3	5	5	5	4	3.5	4.75
228	1	7	14	3	3	3	4	3	3	4	2	1	1	3.16667	2
229	1	7	14	5	5	5	5	5	5	5	5	5	5	5	5
230	1	7	14	3	5	1	4	5	5	2	3	2	4	3.83333	2.75
231	1	7	14	4	4	1	3	4	4	4	4	4	4	3.33333	4
232	1	7	14	4	3	1	2	3	3	5	4	3	5	2.66667	4.25
233	2	11	14	5	5	4	4	3	4	3	5	5	2	4.16667	3.75
234	2	11	14	3	4	2	3	5	1	5	3	5	5	3	4.5
235	2	11	15	3	4	2	4	3	3	3	2	2	2	3.16667	2.25
236	2	11	14	4	4	3	4	3	5	5	3	3	3	3.83333	3.5
237	2	11	14	5	5	5	4	5	5	5	5	5	5	4.83333	5
238	2	11	14	5	4	4	3	4	4	4	5	4	5	4	4.5
239	2	11	14	4	3	4	2	3	3	4	4	4	4	3.16667	4
240	1	11	14	5	5	4	-99	5	5	5	5	5	5	4.8	5
241	1	11	15	5	5	4	2	5	3	3	4	3	4	4	3.5
242	2	11	14	5	5	2	3	4	4	3	2	2	2	3.83333	2.25
243	1	11	14	5	4	1	4	5	4	2	2	2	2	3.83333	2
244	1	11	14	5	5	5	5	4	5	4	3	5	3	4.83333	3.75
245	1	11	14	3	4	3	2	3	4	4	4	4	4	3.16667	4
246	1	11	13	4	4	4	4	3	5	5	5	4	5	4	4.75
247	1	11	15	3	5	1	2	4	4	4	1	3	3	3.16667	2.75
248	1	11	14	3	4	3	2	5	4	3	3	3	3	3.5	3
249	2	11	15	5	5	5	5	5	5	4	5	5	5	5	4.75
250	2	11	14	5	5	4	4	5	4	4	5	5	5	4.5	4.75
251	2	11	15	5	5	4	5	5	5	5	5	-99	4	4.83333	4.66667
252	2	11	13	5	4	5	3	5	5	4	4	4	4	4.5	4
253	2	11	15	4	4	4	4	4	5	5	5	4	5	4.16667	4.75
254	2	11	15	4	4	1	4	1	4	4	2	5	3	3	3.5
255	1	11	14	4	3	2	4	5	3	3	4	4	3	3.5	3.5
256	1	11	15	5	5	1	1	5	5	5	5	5	5	3.66667	5
257	1	11	14	5	4	4	5	5	3	4	4	4	4	4.33333	4
258	1	11	14	3	2	2	1	2	4	1	1	1	1	2.33333	1
259	1	11	14	4	5	4	4	5	4	5	5	5	5	4.33333	5
260	2	11	14	4	3	3	4	3	3	4	5	5	4	3.33333	4.5
261	1	11	14	4	4	2	5	4	5	3	3	5	3	4	3.5
262	2	11	13	5	5	5	4	5	5	4	1	4	5	4.83333	3.5
263	2	11	15	4	5	4	5	5	5	2	2	2	2	4.66667	2
264	2	11	14	4	5	4	3	4	5	4	3	3	4	4.16667	3.5
265	2	11	15	4	3	1	2	4	4	5	2	4	3	3	3.5
266	2	11	13	5	4	4	4	5	5	4	4	4	2	4.5	3.5
267	1	9	15	4	4	4	5	3	4	4	5	4	5	4	4.5
268	1	9	15	3	4	2	1	4	3	3	4	4	3	2.83333	3.5
269	1	9	14	2	3	2	4	3	4	3	2	3	3	3	2.75
270	1	9	15	4	2	2	2	3	1	3	2	2	2	2.33333	2.25
271	1	9	15	4	3	3	2	2	3	4	2	3	3	2.83333	3
272	2	9	14	3	5	4	5	4	4	1	4	1	5	4.16667	2.75
273	2	9	14	4	5	4	2	4	5	4	4	5	5	4	4.5
274	2	9	14	3	4	4	4	4	2	4	4	3	2	3.5	3.25
275	1	9	14	5	5	3	4	5	3	5	4	4	4	4.16667	4.25
276	1	9	14	4	4	2	4	3	3	3	2	1	5	3.33333	2.75
277	1	9	16	4	3	5	5	3	3	3	4	4	2	3.83333	3.25
278	1	9	15	2	3	3	4	3	3	2	3	4	4	3	3.25
279	1	9	14	2	5	1	2	3	4	2	1	2	4	2.83333	2.25
280	1	9	13	4	4	1	2	3	5	4	4	5	3	3.16667	4
281	1	9	14	4	4	3	3	4	4	2	4	4	4	3.66667	3.5
282	2	9	14	4	4	2	2	4	4	3	4	4	3	3.33333	3.5
283	2	9	14	4	4	3	2	5	4	3	3	3	3	3.66667	3
284	2	9	14	3	3	2	4	4	3	4	5	2	2	3.16667	3.25
285	2	9	14	4	3	3	2	3	3	4	3	3	3	3	3.25
286	2	9	14	5	4	4	5	4	4	3	5	4	5	4.33333	4.25
287	1	9	15	3	3	2	4	3	4	4	4	5	5	3.16667	4.5
288	1	9	14	3	4	3	5	4	4	3	5	5	3	3.83333	4
289	1	9	14	3	2	2	2	1	5	1	1	2	2	2.5	1.5
290	1	9	15	5	5	5	5	2	3	5	2	2	2	4.16667	2.75
291	1	9	14	4	4	2	3	2	3	4	4	3	4	3	3.75
292	1	9	14	3	3	3	3	3	3	3	3	3	3	3	3
293	2	9	14	5	5	5	5	5	2	5	5	5	5	4.5	5
294	1	9	14	4	5	2	5	4	4	3	5	5	3	4	4
295	1	9	15	4	5	4	4	3	5	5	5	5	5	4.16667	5
296	1	9	14	3	4	1	4	4	5	1	1	1	2	3.5	1.25
297	2	9	14	3	2	3	2	4	3	2	3	4	3	2.83333	3
298	1	9	15	4	3	2	4	3	2	3	2	3	2	3	2.5
299	1	9	14	4	4	3	1	1	3	3	3	3	3	2.66667	3
300	1	9	14	3	4	3	2	3	2	5	5	5	5	2.83333	5
301	1	9	14	4	4	3	3	4	3	4	4	3	3	3.5	3.5
302	2	9	14	4	4	2	3	4	4	5	5	5	5	3.5	5
303	2	9	14	5	5	4	4	5	5	4	4	4	4	4.66667	4
304	2	9	15	2	3	3	3	3	2	1	2	5	3	2.66667	2.75
305	2	9	14	5	5	4	3	5	4	4	3	3	4	4.33333	3.5
306	2	9	14	4	5	3	4	3	4	3	2	3	3	3.83333	2.75
307	1	9	14	4	4	3	4	4	5	4	3	3	3	4	3.25
308	1	9	14	3	5	1	4	3	3	2	3	4	3	3.16667	3
309	1	9	14	2	4	3	2	3	4	4	3	4	4	3	3.75
310	2	9	14	4	4	3	5	4	5	5	4	4	5	4.16667	4.5
311	2	9	14	5	5	5	5	5	5	5	5	5	5	5	5
312	1	19	14	2	4	2	3	3	4	4	5	3	3	3	3.75
313	1	19	15	4	4	3	3	4	4	4	4	4	4	3.66667	4
314	1	19	14	4	4	2	4	3	4	4	5	4	4	3.5	4.25
315	2	19	15	4	4	4	3	4	4	4	4	3	4	3.83333	3.75
316	2	19	15	4	3	4	3	4	4	4	4	3	4	3.66667	3.75
317	2	19	14	5	5	3	4	3	4	4	4	3	3	4	3.5
318	2	19	14	3	5	1	4	5	2	5	-99	5	5	3.33333	5
319	2	19	15	4	4	4	4	5	5	4	5	5	5	4.33333	4.75
320	2	19	14	4	5	3	3	4	4	5	5	4	4	3.83333	4.5
321	1	19	13	4	4	2	2	2	4	3	2	2	3	3	2.5
322	1	19	15	3	4	2	3	5	2	4	4	4	3	3.16667	3.75
323	1	19	14	3	4	2	3	4	3	4	4	4	4	3.16667	4
324	1	19	14	4	4	3	3	4	4	4	5	5	4	3.66667	4.5
325	2	19	14	4	-99	-99	-99	4	4	-99	-99	3	4	-99	-99
326	2	19	15	4	5	3	4	5	4	4	4	4	4	4.16667	4
327	2	19	14	4	4	4	5	4	5	5	5	4	3	4.33333	4.25
328	2	19	14	4	5	4	3	4	4	4	4	3	3	4	3.5
329	2	19	14	5	5	3	5	5	5	5	3	4	5	4.66667	4.25
330	2	19	15	4	4	4	4	4	4	4	4	5	4	4	4.25
331	2	19	13	4	4	4	4	4	4	4	5	4	4	4	4.25
332	2	19	15	5	4	5	4	5	5	4	4	3	5	4.66667	4
333	2	19	15	4	4	3	3	3	4	3	4	3	3	3.5	3.25
334	2	19	14	4	3	3	4	4	3	5	3	4	4	3.5	4
335	2	19	15	4	3	1	3	2	2	3	2	3	2	2.5	2.5
336	2	4	15	4	4	4	3	4	4	4	4	3	4	3.83333	3.75
337	2	4	14	3	4	3	3	4	4	4	4	4	5	3.5	4.25
338	1	4	14	3	4	2	4	4	4	1	1	1	1	3.5	1
339	1	4	14	5	4	3	3	2	3	3	2	5	5	3.33333	3.75
340	1	4	14	3	4	1	1	2	1	2	1	2	1	2	1.5
341	1	4	14	4	5	2	4	2	4	3	3	4	3	3.5	3.25
342	1	4	15	3	3	2	2	3	3	2	2	2	2	2.66667	2
343	1	4	14	5	3	1	4	4	4	4	5	5	5	3.5	4.75
344	1	4	14	3	4	2	2	4	3	3	3	3	3	3	3
345	1	4	15	4	3	2	4	5	3	5	5	5	5	3.5	5
346	2	4	14	4	4	3	4	2	4	5	4	3	4	3.5	4
347	2	4	15	3	2	4	4	3	3	2	2	2	2	3.16667	2
348	2	4	15	4	4	3	3	4	4	3	4	4	5	3.66667	4
349	2	4	14	5	4	2	3	4	5	5	5	5	5	3.83333	5
350	2	4	14	4	4	4	3	2	2	5	5	5	5	3.16667	5
351	2	4	15	2	1	2	3	3	4	2	1	3	3	2.5	2.25
352	2	4	14	4	4	1	2	2	1	5	3	1	1	2.33333	2.5
353	1	4	15	3	4	3	3	3	3	5	5	4	4	3.16667	4.5
354	1	4	14	3	4	1	4	4	3	4	5	4	4	3.16667	4.25
355	1	4	15	3	5	2	5	1	3	1	1	1	2	3.16667	1.25
356	1	4	14	3	3	2	4	3	4	4	4	3	4	3.16667	3.75
357	1	4	14	4	4	2	3	4	2	5	4	5	4	3.16667	4.5
358	1	4	14	4	4	4	3	2	4	5	3	3	3	3.5	3.5
359	2	4	14	3	2	2	1	3	3	3	2	4	4	2.33333	3.25
360	2	4	14	5	5	4	4	4	5	4	4	4	5	4.5	4.25
361	1	4	14	4	4	3	5	5	4	5	5	5	5	4.16667	5
362	1	4	14	4	3	2	4	3	3	5	4	5	5	3.16667	4.75
363	1	4	14	3	4	3	3	3	3	4	5	4	4	3.16667	4.25
364	1	4	14	5	5	4	5	5	4	5	4	3	5	4.66667	4.25
365	1	4	15	4	3	1	1	2	4	5	4	4	4	2.5	4.25
366	2	4	14	3	4	2	3	2	4	5	5	4	3	3	4.25
367	2	4	14	5	3	1	3	4	4	4	5	5	3	3.33333	4.25
368	1	6	15	3	4	2	4	4	3	5	5	4	4	3.33333	4.5
369	1	6	14	2	3	3	2	-99	3	3	4	-99	4	2.6	3.66667
370	1	6	14	3	2	2	2	1	3	2	3	2	4	2.16667	2.75
371	1	6	14	4	3	4	5	3	3	5	4	5	5	3.66667	4.75
372	1	6	14	4	5	3	4	4	4	3	5	5	4	4	4.25
373	1	6	15	3	2	2	2	3	4	2	4	3	3	2.66667	3
374	1	6	14	5	4	5	4	5	5	5	5	5	5	4.66667	5
375	1	6	14	5	4	3	2	2	5	4	4	5	5	3.5	4.5
376	1	6	14	3	2	3	2	2	3	2	2	2	3	2.5	2.25
377	1	6	15	2	4	2	1	3	2	5	4	3	4	2.33333	4
378	1	6	15	4	5	2	4	5	5	3	5	5	5	4.16667	4.5
379	1	6	14	2	2	2	2	3	2	4	5	5	5	2.16667	4.75
380	2	6	14	5	4	3	4	5	4	4	5	5	4	4.16667	4.5
381	2	6	14	4	4	2	2	3	4	4	4	4	4	3.16667	4
382	2	6	14	5	5	3	4	3	4	4	5	5	5	4	4.75
383	2	6	14	5	5	4	5	5	5	4	3	4	5	4.83333	4
384	2	6	14	2	3	2	2	3	3	3	2	3	4	2.5	3
385	2	6	14	4	4	3	4	5	4	4	4	3	5	4	4
386	2	6	15	5	5	4	4	4	5	1	5	3	5	4.5	3.5
387	2	6	14	5	5	4	4	3	4	5	-99	4	5	4.16667	4.66667
388	2	6	14	5	5	5	5	5	5	5	5	5	5	5	5
389	2	6	14	4	4	3	2	5	5	4	4	4	4	3.83333	4
390	2	6	14	4	3	4	3	3	4	3	2	3	4	3.5	3
391	2	6	14	4	5	3	4	4	3	5	4	4	5	3.83333	4.5
392	2	6	14	4	5	5	4	5	3	5	4	3	3	4.33333	3.75
393	2	6	15	2	3	1	-99	1	2	3	1	2	4	1.8	2.5
394	2	6	14	2	4	1	2	4	4	3	3	2	3	2.83333	2.75
395	2	6	14	3	2	2	3	4	3	1	2	1	2	2.83333	1.5
396	2	6	14	2	1	1	5	4	4	5	5	5	5	2.83333	5
397	1	6	14	5	5	5	3	5	5	5	5	5	5	4.66667	5
398	1	6	14	5	5	3	2	5	3	4	4	4	3	3.83333	3.75
399	1	6	14	4	4	4	5	4	5	5	4	4	5	4.33333	4.5
400	1	6	13	4	4	3	4	4	4	4	4	5	4	3.83333	4.25
401	2	6	14	4	5	2	2	3	4	5	4	5	5	3.33333	4.75
402	2	6	14	3	4	4	5	4	4	1	1	1	5	4	2
403	2	6	14	3	2	2	3	2	5	4	5	4	5	2.83333	4.5
404	2	6	15	4	5	4	4	4	4	4	3	3	3	4.16667	3.25
405	2	6	14	5	5	5	4	5	5	5	5	5	5	4.83333	5
406	2	6	14	4	4	2	3	3	4	4	2	2	-99	3.33333	2.66667
407	1	6	13	4	5	3	4	5	4	5	5	5	4	4.16667	4.75
408	1	6	14	4	4	4	4	5	4	3	5	5	4	4.16667	4.25
409	1	6	14	5	5	4	4	4	5	5	5	5	5	4.5	5
410	1	6	14	5	5	3	4	5	5	4	4	5	5	4.5	4.5
411	2	6	14	2	2	1	2	3	5	1	1	4	2	2.5	2
412	2	6	15	5	4	3	4	4	5	4	4	4	5	4.16667	4.25
413	2	6	14	4	2	2	2	3	3	3	2	3	3	2.66667	2.75
414	2	6	15	4	3	1	2	2	3	3	2	2	2	2.5	2.25
415	2	6	14	4	4	3	3	3	4	4	4	4	4	3.5	4
416	2	6	14	4	4	4	5	5	5	4	4	4	5	4.5	4.25
417	2	10	15	5	4	4	3	4	4	4	4	5	5	4	4.5
418	2	10	15	2	4	5	5	3	4	3	3	3	3	3.83333	3
419	1	10	14	5	5	2	2	5	5	2	3	3	5	4	3.25
420	1	10	15	5	5	1	3	4	5	3	2	4	5	3.83333	3.5
421	1	10	15	4	4	5	2	5	2	4	5	5	5	3.66667	4.75
422	2	10	14	4	3	3	5	4	3	4	2	5	4	3.66667	3.75
423	2	10	14	3	4	3	2	3	3	4	4	4	4	3	4
424	1	10	15	2	2	2	3	2	3	2	1	2	1	2.33333	1.5
425	1	10	14	5	4	4	4	5	4	5	4	5	5	4.33333	4.75
426	1	10	14	5	4	4	4	5	4	5	5	5	5	4.33333	5
427	1	10	14	4	4	3	4	5	4	4	5	5	5	4	4.75
428	2	10	15	3	4	2	4	3	5	3	4	3	5	3.5	3.75
429	2	10	14	3	4	4	3	3	4	4	3	3	4	3.5	3.5
430	2	10	15	2	4	1	4	2	3	1	1	1	1	2.66667	1
431	2	10	14	3	2	5	2	2	2	2	1	1	2	2.66667	1.5
432	2	10	14	3	3	2	2	3	4	4	3	3	4	2.83333	3.5
433	1	10	15	3	4	3	3	4	3	3	2	1	4	3.33333	2.5
434	1	10	14	4	4	5	4	3	3	3	3	3	2	3.83333	2.75
435	1	10	14	4	3	3	4	4	4	4	4	4	2	3.66667	3.5
436	1	10	14	4	3	2	4	4	4	3	4	3	2	3.5	3
437	1	10	15	4	4	2	2	3	3	5	4	5	5	3	4.75
438	1	10	14	5	4	4	2	2	5	3	4	4	5	3.66667	4
439	1	10	14	2	2	4	2	2	3	3	2	2	2	2.5	2.25
440	1	10	14	4	4	3	3	4	4	2	2	2	4	3.66667	2.5
441	1	10	14	4	5	2	5	4	4	-99	2	3	3	4	2.66667
442	1	10	15	4	5	3	5	3	4	5	5	5	5	4	5
443	1	10	14	3	2	1	1	2	4	1	-99	3	3	2.16667	2.33333
444	1	10	14	3	2	1	2	4	4	1	1	1	2	2.66667	1.25
445	1	10	14	4	3	2	4	1	5	4	3	4	3	3.16667	3.5
446	1	10	14	4	3	2	3	4	3	3	4	3	5	3.16667	3.75
447	1	10	14	4	4	2	3	3	4	2	2	3	3	3.33333	2.5
448	1	10	14	3	2	2	3	3	3	3	3	4	3	2.66667	3.25
449	1	10	14	4	3	1	2	5	1	4	2	3	1	2.66667	2.5
450	1	16	14	4	4	1	3	3	5	3	5	5	5	3.33333	4.5
451	1	16	15	5	4	1	3	4	4	3	3	3	2	3.5	2.75
452	2	16	14	5	5	1	5	5	5	5	5	4	5	4.33333	4.75
453	1	16	14	4	4	3	5	4	5	4	3	4	4	4.16667	3.75
454	1	16	15	4	4	2	3	2	3	3	2	4	4	3	3.25
455	2	16	15	2	2	2	3	2	3	3	2	2	1	2.33333	2
456	1	16	14	4	5	5	5	5	4	5	5	5	5	4.66667	5
457	1	16	15	4	3	2	1	3	3	4	2	4	3	2.66667	3.25
458	1	16	15	3	4	2	4	4	4	4	4	4	4	3.5	4
459	2	16	14	5	3	3	1	4	4	5	5	4	5	3.33333	4.75
460	2	16	14	4	4	3	3	3	4	-99	5	5	5	3.5	5
461	2	16	15	3	3	2	4	3	5	4	5	2	5	3.33333	4
462	2	16	16	3	3	3	3	3	3	3	3	3	3	3	3
463	2	16	14	3	4	5	3	3	4	4	4	3	2	3.66667	3.25
464	2	16	15	5	5	5	3	5	4	3	5	5	5	4.5	4.5
465	2	16	15	4	4	3	4	5	4	4	5	4	5	4	4.5
466	2	16	14	3	4	3	4	5	4	4	3	4	4	3.83333	3.75
467	2	16	14	5	5	3	5	4	5	4	5	4	4	4.5	4.25
468	2	16	15	4	3	3	1	5	4	4	3	3	2	3.33333	3
469	2	16	15	4	4	4	3	2	4	5	5	5	5	3.5	5
470	1	16	14	4	4	3	3	3	4	5	5	5	5	3.5	5
471	1	16	14	3	3	2	2	4	3	4	4	5	5	2.83333	4.5
472	1	16	15	4	3	2	2	3	3	3	4	3	3	2.83333	3.25
473	1	16	14	4	4	3	3	4	4	3	-99	3	3	3.66667	3
474	2	16	14	4	4	3	4	5	4	5	5	5	5	4	5
475	2	16	14	5	4	3	2	5	5	4	4	3	2	4	3.25
476	2	1	14	4	4	2	3	4	3	3	3	2	2	3.33333	2.5
477	2	1	14	3	3	2	2	3	1	2	2	2	3	2.33333	2.25
478	2	1	14	4	4	1	4	2	4	1	1	1	1	3.16667	1
479	2	1	14	3	3	2	4	2	3	4	4	4	4	2.83333	4
480	2	1	14	3	5	1	1	4	5	3	1	2	1	3.16667	1.75
481	2	1	14	4	4	2	4	2	3	3	2	2	2	3.16667	2.25
482	1	1	14	1	1	1	1	1	1	1	1	1	1	1	1
483	1	1	14	3	4	2	2	4	3	3	3	3	2	3	2.75
484	1	1	14	4	3	2	3	4	4	2	3	4	3	3.33333	3
485	1	1	14	4	4	3	2	4	4	4	4	3	5	3.5	4
486	1	1	14	2	2	4	3	4	4	3	3	3	3	3.16667	3
487	1	1	15	3	3	2	3	4	3	4	5	5	4	3	4.5
488	2	1	16	4	4	3	5	4	4	3	3	3	3	4	3
489	1	1	14	4	4	2	1	4	4	1	3	1	2	3.16667	1.75
490	2	1	15	5	5	5	5	5	5	5	5	5	5	5	5
491	2	1	14	3	3	4	4	4	3	4	3	3	3	3.5	3.25
492	1	1	14	4	2	1	1	3	2	1	1	1	1	2.16667	1
493	1	1	14	3	3	3	2	3	4	4	2	4	5	3	3.75
494	1	1	14	5	5	5	5	5	5	5	5	5	5	5	5
495	1	1	14	3	2	5	4	5	4	3	2	3	3	3.83333	2.75
496	1	1	14	1	3	3	1	4	3	4	5	5	5	2.5	4.75
497	1	1	14	5	5	1	3	5	4	3	2	3	2	3.83333	2.5
498	1	15	14	4	2	4	3	3	3	5	5	4	5	3.16667	4.75
499	1	15	14	5	4	3	4	5	4	5	5	4	4	4.16667	4.5
500	1	15	14	3	4	1	2	2	3	3	5	4	5	2.5	4.25
501	1	15	14	3	4	2	3	3	4	4	5	4	4	3.16667	4.25
502	1	15	14	5	4	3	4	4	4	4	5	5	5	4	4.75
503	1	15	14	3	4	4	3	4	3	3	4	3	2	3.5	3
504	2	15	14	3	4	3	3	4	4	2	4	3	3	3.5	3
505	2	15	15	3	4	1	3	3	3	3	2	3	2	2.83333	2.5
506	2	15	15	4	4	4	5	5	4	4	5	5	5	4.33333	4.75
507	2	15	15	4	4	2	2	4	4	3	4	4	3	3.33333	3.5
508	2	15	13	4	4	4	5	5	4	2	5	5	4	4.33333	4
509	1	15	14	3	4	2	3	4	4	3	4	2	3	3.33333	3
510	1	15	14	4	4	2	4	3	5	3	3	3	3	3.66667	3
511	2	15	14	4	4	2	3	2	5	4	5	5	5	3.33333	4.75
512	2	15	14	5	3	1	2	5	4	3	3	3	3	3.33333	3
513	2	15	14	4	4	3	4	4	5	3	3	4	1	4	2.75
514	2	15	14	5	4	1	4	5	5	4	4	4	4	4	4
515	2	15	15	4	4	4	4	4	4	4	4	3	3	4	3.5
516	2	15	14	4	3	3	4	5	3	2	1	2	2	3.66667	1.75
517	2	15	14	5	4	4	4	5	3	2	5	5	5	4.16667	4.25
518	1	15	14	4	3	3	4	5	4	4	5	5	5	3.83333	4.75
519	1	15	14	4	4	3	3	4	4	4	2	3	3	3.66667	3
520	1	15	-99	3	3	4	2	2	4	3	1	1	4	3	2.25
521	1	15	14	3	5	5	5	4	3	3	4	3	4	4.16667	3.5
522	1	15	14	4	5	1	2	2	3	3	4	4	3	2.83333	3.5
523	1	15	14	4	3	3	3	5	4	2	3	3	2	3.66667	2.5
524	1	22	14	5	4	2	2	5	5	5	4	5	5	3.83333	4.75
525	1	22	14	5	5	4	4	5	3	5	5	4	3	4.33333	4.25
526	1	22	15	3	4	2	4	3	2	2	5	3	3	3	3.25
527	1	22	14	3	3	1	1	3	3	3	2	3	3	2.33333	2.75
528	2	22	15	4	4	5	4	5	5	5	5	4	4	4.5	4.5
529	2	22	14	4	3	3	3	5	3	3	4	3	4	3.5	3.5
530	2	22	14	4	5	4	3	2	4	2	1	2	5	3.66667	2.5
531	2	22	14	4	4	2	3	4	4	3	2	3	4	3.5	3
532	1	22	14	3	4	4	4	3	4	3	4	3	4	3.66667	3.5
533	1	22	14	3	3	3	2	3	4	4	4	4	4	3	4
534	1	22	15	3	3	4	4	4	4	4	2	2	3	3.66667	2.75
535	1	22	14	4	3	2	3	3	4	2	1	2	3	3.16667	2
536	1	22	14	3	3	3	4	3	4	5	5	5	5	3.33333	5
537	2	22	14	4	4	4	4	5	5	5	2	4	3	4.33333	3.5
538	2	22	15	5	5	5	4	3	5	4	5	4	4	4.5	4.25
539	2	22	14	4	3	4	3	3	4	4	4	3	4	3.5	3.75
540	2	22	15	5	4	4	5	5	4	5	5	5	5	4.5	5
541	2	22	14	1	2	-99	5	3	1	3	4	2	1	2.4	2.5
542	2	22	14	3	3	5	5	4	5	5	5	-99	5	4.16667	5
543	2	22	14	4	4	4	3	4	3	4	3	5	5	3.66667	4.25
544	2	22	14	3	3	3	3	3	3	3	3	3	3	3	3
545	2	22	15	5	4	3	4	4	4	4	5	4	3	4	4
546	2	22	14	4	2	2	4	2	4	4	4	3	5	3	4
547	2	8	14	4	3	4	4	3	3	3	4	4	3	3.5	3.5
548	2	8	14	4	4	3	3	5	4	4	4	3	4	3.83333	3.75
549	2	8	14	3	3	2	2	2	3	3	2	2	2	2.5	2.25
550	2	8	14	4	3	3	4	4	4	3	5	4	3	3.66667	3.75
551	2	8	14	5	5	5	5	5	4	5	5	5	4	4.83333	4.75
552	1	8	14	3	3	3	3	3	2	3	3	4	4	2.83333	3.5
553	1	8	15	3	4	3	3	3	4	2	3	3	3	3.33333	2.75
554	1	8	14	3	4	1	1	5	4	2	2	3	4	3	2.75
555	1	8	15	3	4	4	3	3	2	4	1	3	1	3.16667	2.25
556	1	8	14	5	4	4	4	5	5	5	5	5	5	4.5	5
557	1	8	14	2	3	4	3	4	5	1	1	1	1	3.5	1
558	1	8	15	2	2	2	1	2	1	2	1	1	1	1.66667	1.25
559	1	8	14	4	5	1	2	3	3	3	4	5	5	3	4.25
560	1	8	14	4	4	2	3	4	4	3	4	3	5	3.5	3.75
561	1	8	14	3	3	2	3	3	3	2	1	1	3	2.83333	1.75
562	1	8	14	3	3	3	3	3	3	3	3	3	3	3	3
563	2	8	15	4	4	2	4	4	4	4	3	3	3	3.66667	3.25
564	2	8	14	5	5	4	4	4	5	5	5	5	5	4.5	5
565	1	8	14	5	5	3	3	3	4	4	5	4	5	3.83333	4.5
566	2	8	14	3	3	2	2	2	3	4	2	3	3	2.5	3
567	2	8	14	5	4	5	5	4	5	3	1	4	2	4.66667	2.5
568	1	8	15	4	4	1	3	4	3	5	5	5	5	3.16667	5
569	1	8	14	3	2	1	-99	3	3	1	5	2	1	2.4	2.25
570	1	8	14	3	3	2	2	2	2	4	1	3	3	2.33333	2.75
571	1	8	14	5	5	1	1	5	5	1	5	5	5	3.66667	4
572	1	8	14	4	3	3	4	4	3	4	3	4	4	3.5	3.75
573	1	8	14	4	3	4	5	2	3	4	5	5	5	3.5	4.75
574	1	8	15	5	5	3	2	5	3	5	5	5	4	3.83333	4.75
575	1	8	14	5	4	5	5	5	4	3	5	4	4	4.66667	4
576	1	8	14	5	5	5	5	5	5	5	5	5	3	5	4.5
577	1	8	14	5	5	5	5	5	5	5	5	5	5	5	5
578	2	8	14	4	3	2	5	5	5	5	5	5	5	4	5
579	2	8	14	5	4	4	4	-99	5	3	5	4	5	4.4	4.25
580	2	8	14	2	3	3	2	1	2	2	1	3	2	2.16667	2
581	2	8	14	2	3	3	3	1	2	2	3	3	2	2.33333	2.5
582	2	8	14	3	4	2	2	3	4	2	2	2	3	3	2.25
583	2	8	15	4	4	2	3	4	3	4	4	4	4	3.33333	4
584	2	8	15	3	2	2	4	1	3	4	2	5	2	2.5	3.25
585	2	8	14	4	4	3	4	4	3	3	2	2	2	3.66667	2.25
586	2	8	14	4	4	3	3	3	3	3	4	3	4	3.33333	3.5
587	2	2	14	4	5	4	5	4	4	3	3	5	4	4.33333	3.75
588	2	2	13	4	4	3	4	4	5	3	1	3	5	4	3
589	2	2	14	5	4	2	4	5	5	4	4	3	3	4.16667	3.5
590	2	2	15	3	4	5	2	2	4	2	4	3	5	3.33333	3.5
591	2	2	14	4	4	3	5	4	5	4	4	4	2	4.16667	3.5
592	2	2	14	4	4	5	5	5	5	1	2	2	1	4.66667	1.5
593	2	2	14	5	5	3	4	5	5	5	5	5	5	4.5	5
594	2	2	16	4	3	2	3	4	4	4	2	3	3	3.33333	3
595	2	2	14	3	4	4	4	4	4	3	4	3	3	3.83333	3.25
596	2	2	14	2	3	3	1	5	5	5	1	1	1	3.16667	2
597	2	2	14	5	5	4	5	4	4	5	5	5	5	4.5	5
598	2	2	14	5	5	3	5	5	4	4	2	3	2	4.5	2.75
599	2	2	14	5	5	4	5	3	5	4	1	3	4	4.5	3
600	2	2	14	3	4	3	5	3	4	3	1	1	1	3.66667	1.5
601	2	2	15	4	4	4	4	5	4	3	5	4	5	4.16667	4.25
602	2	2	14	4	4	4	2	4	4	4	4	4	4	3.66667	4
603	2	2	15	3	3	2	5	5	3	4	3	5	5	3.5	4.25
604	2	2	14	3	3	3	2	2	3	3	3	2	2	2.66667	2.5
605	2	2	14	5	4	2	3	2	4	4	5	4	5	3.33333	4.5
606	2	2	13	2	1	5	2	5	2	2	1	1	3	2.83333	1.75
607	2	2	15	5	5	5	4	5	5	4	3	3	4	4.83333	3.5
608	2	2	14	5	4	3	5	5	5	4	4	4	4	4.5	4
609	2	2	14	5	4	2	3	3	4	3	4	3	5	3.5	3.75
610	1	2	14	4	3	4	2	4	4	-99	4	3	4	3.5	3.66667
611	1	2	13	4	4	3	2	5	4	3	3	4	3	3.66667	3.25
612	1	2	14	3	3	3	4	4	5	3	5	4	5	3.66667	4.25
613	1	2	14	4	4	4	4	4	5	4	1	2	2	4.16667	2.25
614	1	2	14	3	3	1	2	2	2	4	3	3	4	2.16667	3.5
615	1	2	15	2	5	1	2	3	5	3	2	5	5	3	3.75
616	1	2	14	3	4	4	3	4	4	2	3	3	4	3.66667	3
617	1	2	14	4	5	2	5	4	5	5	5	5	4	4.16667	4.75
618	1	2	14	3	2	1	2	1	2	3	3	2	3	1.83333	2.75
619	1	2	14	4	4	5	3	4	3	3	3	5	4	3.83333	3.75
620	1	2	14	3	3	2	1	2	2	2	1	1	1	2.16667	1.25
621	1	2	14	4	5	2	4	4	5	3	1	5	3	4	3
622	1	2	14	5	5	3	2	4	5	4	3	2	3	4	3
623	1	2	14	5	4	5	4	2	2	4	4	3	4	3.66667	3.75
624	1	2	14	3	2	2	4	2	3	1	3	2	4	2.66667	2.5
625	1	20	15	4	4	3	3	-99	3	3	1	2	4	3.4	2.5
626	1	20	14	4	5	4	3	4	5	4	5	5	4	4.16667	4.5
627	2	20	14	5	5	5	3	5	5	3	4	4	4	4.66667	3.75
628	2	20	15	5	5	5	5	5	5	5	3	5	2	5	3.75
629	2	20	14	4	4	2	3	5	5	5	5	4	4	3.83333	4.5
630	2	20	15	5	5	4	4	5	4	4	5	5	5	4.5	4.75
631	1	20	15	3	3	3	3	3	3	3	3	3	3	3	3
632	1	20	14	3	4	4	3	2	4	2	4	3	4	3.33333	3.25
633	1	20	14	3	3	2	2	2	3	4	1	1	1	2.5	1.75
634	1	20	14	4	3	3	3	3	4	3	2	3	3	3.33333	2.75
635	2	20	15	2	2	2	3	4	1	4	2	2	4	2.33333	3
636	2	20	14	2	2	2	2	2	2	2	2	2	2	2	2
637	2	20	15	5	5	3	3	3	4	4	5	4	5	3.83333	4.5
638	2	20	14	3	4	2	2	4	3	5	4	4	3	3	4
639	1	20	14	3	4	3	1	3	3	4	2	4	4	2.83333	3.5
640	1	20	14	2	2	3	1	3	4	2	3	4	3	2.5	3
641	1	20	15	3	3	2	4	2	4	4	3	3	3	3	3.25
642	1	20	14	4	5	3	2	4	4	4	3	4	4	3.66667	3.75
643	2	20	15	4	3	4	4	4	3	3	3	3	3	3.66667	3
644	2	20	15	3	3	2	2	1	3	1	1	3	2	2.33333	1.75
645	1	20	15	4	5	4	3	3	5	3	4	4	4	4	3.75
646	1	20	14	3	4	4	3	5	5	4	4	4	4	4	4
647	2	20	15	4	5	2	3	2	1	3	3	3	4	2.83333	3.25
648	2	20	14	4	3	3	4	4	4	3	3	2	3	3.66667	2.75
649	2	20	14	3	2	1	1	4	2	2	2	2	5	2.16667	2.75
650	2	20	14	4	4	3	3	4	4	3	4	3	3	3.66667	3.25
651	1	13	14	5	5	4	5	4	5	5	3	5	5	4.66667	4.5
652	1	13	13	3	4	2	3	4	3	3	2	3	3	3.16667	2.75
653	1	13	14	4	3	4	4	4	4	3	3	3	4	3.83333	3.25
654	1	13	14	3	4	2	3	3	4	4	2	2	4	3.16667	3
655	1	13	15	4	4	1	2	2	2	4	5	5	5	2.5	4.75
656	1	13	14	2	3	2	2	2	3	2	3	2	3	2.33333	2.5
657	1	13	14	3	1	2	2	4	1	2	1	1	1	2.16667	1.25
658	1	13	15	3	4	1	1	1	1	1	1	3	1	1.83333	1.5
659	1	13	14	3	4	5	4	5	5	2	1	2	2	4.33333	1.75
660	2	13	14	2	4	1	1	3	4	3	1	1	2	2.5	1.75
661	2	13	14	5	4	3	4	4	4	4	2	2	1	4	2.25
662	2	13	14	5	5	3	4	2	-99	5	5	-99	5	3.8	5
663	1	13	14	2	4	1	5	5	4	1	2	5	1	3.5	2.25
664	1	13	14	4	4	2	2	1	4	3	2	1	3	2.83333	2.25
665	1	13	15	4	3	1	1	4	3	2	1	2	2	2.66667	1.75
666	1	13	14	3	2	2	1	1	3	1	1	2	1	2	1.25
667	2	13	14	4	2	1	2	3	5	2	4	4	5	2.83333	3.75
668	2	13	14	3	3	2	4	2	4	4	2	2	4	3	3
669	1	13	15	5	4	2	3	2	3	5	5	5	5	3.16667	5
670	1	13	14	4	4	5	2	5	5	3	2	3	3	4.16667	2.75
671	1	13	14	3	3	2	2	3	3	2	2	2	2	2.66667	2
672	2	13	15	4	4	5	3	4	4	4	4	4	4	4	4
673	1	13	14	4	3	2	3	4	4	4	2	3	3	3.33333	3
674	2	13	15	4	5	2	4	5	4	5	5	5	2	4	4.25
675	2	13	15	3	4	2	4	4	2	4	3	3	3	3.16667	3.25
676	2	13	14	4	4	4	5	3	4	3	2	3	4	4	3
677	2	13	14	4	2	1	2	1	5	1	1	1	1	2.5	1
678	2	13	14	3	4	1	1	1	3	4	4	5	4	2.16667	4.25
679	1	13	15	3	4	4	4	4	3	4	4	3	4	3.66667	3.75
680	1	13	14	3	3	2	4	4	4	2	2	2	3	3.33333	2.25
681	1	13	14	5	5	3	2	4	4	3	3	2	3	3.83333	2.75
682	1	13	15	3	3	4	3	3	3	3	2	2	3	3.16667	2.5
683	1	13	14	3	2	3	1	2	2	5	3	3	4	2.16667	3.75
684	2	13	15	1	3	4	3	4	2	3	2	2	3	2.83333	2.5
685	2	13	14	1	3	4	3	2	3	5	3	5	2	2.66667	3.75
686	2	13	14	3	3	2	4	2	3	2	2	2	2	2.83333	2
687	2	13	14	4	4	4	4	3	4	5	4	4	4	3.83333	4.25
688	1	13	14	3	3	2	2	3	3	4	3	2	3	2.66667	3
689	1	13	14	4	5	3	4	5	5	3	2	2	2	4.33333	2.25
690	1	13	14	3	4	3	2	4	3	4	4	4	4	3.16667	4
691	1	13	15	5	3	3	4	4	4	4	5	4	4	3.83333	4.25
692	1	13	14	5	4	2	1	5	5	3	3	3	4	3.66667	3.25
693	1	13	14	4	4	3	3	5	5	5	4	4	4	4	4.25
694	2	13	15	5	5	5	5	5	5	5	5	5	3	5	4.5
695	2	13	14	5	5	1	4	5	3	1	2	5	4	3.83333	3
696	2	13	14	5	4	4	5	5	5	5	5	5	5	4.66667	5
697	1	13	14	5	5	4	5	5	5	4	4	4	5	4.83333	4.25
698	2	13	14	4	4	4	4	3	4	3	2	2	3	3.83333	2.5
699	2	13	16	5	4	3	3	3	5	3	3	3	3	3.83333	3
700	2	13	14	5	5	4	5	5	-99	4	5	3	5	4.8	4.25
701	2	13	14	4	5	4	4	4	5	5	4	4	5	4.33333	4.5
702	2	13	14	4	5	2	4	5	4	3	2	4	4	4	3.25
703	2	13	14	5	5	3	5	5	5	4	3	4	3	4.66667	3.5
704	2	13	14	4	1	3	3	4	4	4	2	4	2	3.16667	3
705	1	13	15	5	5	4	5	5	5	5	5	5	5	4.83333	5
706	1	13	16	2	3	4	3	3	3	3	2	3	3	3	2.75
707	1	13	16	1	2	1	2	4	2	3	3	3	3	2	3
708	1	13	14	3	4	5	5	4	4	4	2	2	3	4.16667	2.75
709	1	13	14	2	5	3	4	5	5	4	4	3	4	4	3.75
710	1	13	15	3	4	2	4	5	4	2	2	1	2	3.66667	1.75
711	1	13	16	5	3	1	3	5	3	2	3	3	4	3.33333	3
712	2	17	14	4	3	2	5	5	3	1	2	5	2	3.66667	2.5
713	2	17	13	3	4	4	1	4	3	4	4	3	4	3.16667	3.75
714	1	17	15	4	4	4	5	5	4	5	5	5	4	4.33333	4.75
715	1	17	14	4	5	4	5	3	4	3	4	4	4	4.16667	3.75
716	1	17	14	3	2	2	2	3	3	4	3	4	4	2.5	3.75
717	1	17	14	4	5	3	4	5	4	5	5	5	4	4.16667	4.75
718	2	17	14	5	5	5	5	5	5	5	5	5	5	5	5
719	2	17	14	4	5	5	5	4	5	5	3	5	4	4.66667	4.25
720	2	17	14	4	5	1	3	2	5	3	4	5	2	3.33333	3.5
721	2	17	15	4	4	3	4	5	5	3	5	4	5	4.16667	4.25
722	2	17	15	4	4	3	4	3	4	4	4	4	4	3.66667	4
723	2	17	15	5	4	2	4	5	4	5	1	1	4	4	2.75
724	2	17	14	3	4	2	3	4	4	3	4	5	5	3.33333	4.25
725	2	17	14	4	4	3	4	2	3	5	4	5	4	3.33333	4.5
726	1	17	14	4	5	3	4	4	4	3	5	4	4	4	4
727	1	17	15	4	4	4	4	4	4	5	5	3	4	4	4.25
728	1	17	14	4	4	3	4	5	4	5	5	5	5	4	5
729	1	17	14	4	3	2	4	3	4	4	4	4	3	3.33333	3.75
730	2	17	15	4	3	1	3	3	5	5	4	2	5	3.16667	4
731	2	17	14	4	3	2	4	2	4	3	4	3	3	3.16667	3.25
732	1	17	14	3	3	2	2	3	3	4	4	4	4	2.66667	4
733	1	17	14	4	4	1	1	2	4	3	2	3	5	2.66667	3.25
734	1	17	15	4	4	5	5	4	5	5	4	5	5	4.5	4.75
735	2	20	14	5	5	4	3	5	5	4	5	5	5	4.5	4.75
736	2	20	14	4	4	5	3	5	4	4	4	4	4	4.16667	4
737	2	20	14	4	4	3	4	4	4	5	5	4	5	3.83333	4.75
738	2	20	15	5	4	5	5	5	5	5	5	5	5	4.83333	5
739	2	20	14	3	3	1	2	3	3	4	4	4	4	2.5	4
740	2	20	14	4	3	3	3	4	4	4	4	4	3	3.5	3.75
741	2	20	14	3	3	1	3	4	3	4	5	5	4	2.83333	4.5
742	2	20	15	5	3	1	3	5	4	3	5	5	5	3.5	4.5
743	1	20	15	3	4	2	3	3	4	3	4	2	5	3.16667	3.5
744	1	20	14	3	4	5	1	4	4	3	2	3	2	3.5	2.5
745	1	20	14	4	3	3	2	4	3	2	3	3	3	3.16667	2.75
746	1	20	15	4	4	2	2	3	4	2	3	4	3	3.16667	3
747	1	20	14	5	4	3	5	3	5	3	5	5	5	4.16667	4.5
748	1	20	14	3	3	3	3	2	3	3	4	4	4	2.83333	3.75
749	1	20	15	5	4	3	4	2	4	4	3	5	3	3.66667	3.75
750	1	20	15	4	3	2	2	3	3	3	3	2	3	2.83333	2.75
751	1	20	14	2	3	3	2	4	4	3	1	2	4	3	2.5
752	1	20	15	3	2	2	2	2	2	3	3	3	2	2.16667	2.75
753	1	20	14	4	4	4	3	4	5	4	5	5	5	4	4.75
754	1	20	14	4	3	2	2	3	3	4	3	3	3	2.83333	3.25
755	1	20	15	5	3	5	2	5	4	5	5	5	3	4	4.5
756	1	20	14	5	4	4	2	4	5	5	4	4	3	4	4
757	2	20	16	3	2	1	3	4	3	3	2	2	4	2.66667	2.75
758	2	20	15	3	1	1	1	1	1	1	1	3	1	1.33333	1.5
759	2	20	14	3	1	2	3	3	5	2	1	2	3	2.83333	2
760	2	20	14	4	3	2	3	2	3	4	3	3	3	2.83333	3.25
761	2	20	15	3	5	5	4	5	4	4	5	4	5	4.33333	4.5
762	2	20	14	4	2	4	3	2	4	4	5	3	4	3.16667	4
763	2	12	14	5	4	2	3	4	2	5	5	5	3	3.33333	4.5
764	2	12	14	4	4	1	4	3	4	4	5	5	5	3.33333	4.75
765	2	12	14	3	2	2	1	4	1	2	2	2	3	2.16667	2.25
766	2	12	14	3	3	3	2	3	4	4	4	3	4	3	3.75
767	2	12	14	2	3	1	2	3	2	2	1	1	3	2.16667	1.75
768	2	12	14	4	4	2	2	3	4	5	4	5	5	3.16667	4.75
769	2	12	12	5	1	1	5	5	5	5	1	1	1	3.66667	2
770	1	12	14	3	4	4	4	4	4	5	4	5	4	3.83333	4.5
771	1	12	14	3	3	2	1	4	5	3	3	3	5	3	3.5
772	1	12	14	4	3	4	2	3	3	4	4	4	3	3.16667	3.75
773	1	12	13	4	4	3	4	4	4	4	4	5	5	3.83333	4.5
774	1	12	14	4	2	1	5	3	5	2	1	1	5	3.33333	2.25
775	1	12	14	4	3	3	2	5	4	4	4	4	4	3.5	4
776	1	12	15	3	4	1	2	5	4	2	2	2	2	3.16667	2
777	1	12	14	3	3	2	3	3	4	4	4	4	4	3	4
778	1	12	14	3	4	4	3	4	5	5	5	4	4	3.83333	4.5
779	1	12	14	4	4	1	2	3	4	4	1	1	4	3	2.5
780	2	18	14	4	4	4	3	3	4	5	4	4	4	3.66667	4.25
781	2	18	14	5	5	4	5	4	4	4	5	5	5	4.5	4.75
782	2	18	15	4	4	3	5	5	4	2	3	3	3	4.16667	2.75
783	2	18	14	5	5	5	4	4	4	-99	5	5	5	4.5	5
784	1	18	14	4	3	2	1	3	3	4	5	5	5	2.66667	4.75
785	2	18	15	4	4	4	3	3	4	4	5	5	5	3.66667	4.75
786	2	18	15	4	4	4	5	4	5	4	4	4	4	4.33333	4
787	1	18	14	4	5	4	3	5	5	5	5	4	5	4.33333	4.75
788	1	18	14	5	5	3	4	4	4	4	5	5	5	4.16667	4.75
789	1	18	16	-99	5	5	5	5	5	4	3	4	5	5	4
790	1	18	14	5	5	3	3	5	5	4	3	3	3	4.33333	3.25
791	2	18	14	4	4	5	5	5	4	3	3	5	5	4.5	4
792	1	18	13	4	4	5	3	5	4	5	3	5	5	4.16667	4.5
793	1	18	14	3	3	2	2	3	3	4	3	3	5	2.66667	3.75
794	1	18	14	4	3	3	4	5	4	4	4	4	4	3.83333	4
